# Supplementary material for: National, regional, and worldwide epidemiology of psoriasis: systematic analysis and modelling study
Source: PubMed Central journal article supplement — BMJ. 2020 May 28;369:m1590. doi: 10.1136/bmj.m1590 (PMC7254147; doi:10.1136/bmj.m1590), 2020-05-28
Supplement: parr052230.ww1.pdf [file parr052230.ww1.pdf]

# National, regional and worldwide epidemiology of psoriasis: systematic analysis and modelling study

Rosa Parisi, PhD<sup>†</sup>; Ireny YK Iskandar, PhD<sup>†</sup>; Prof Evangelos Kontopantelis, PhD; Prof Matthias Augustin, MD; Prof Christopher EM Griffiths, MD; Prof Darren M Ashcroft, MD; on behalf of the Global Psoriasis Atlas

<sup>†</sup> Joint first author

## Text 1: Definitions and analytic framework

We performed a systematic review and meta-analysis of the incidence and prevalence of psoriasis. Incidence data were summarised descriptively, whereas using prevalence data we generated global, regional and country-specific estimates of the prevalence of the disease for 2017.

The study was carried out according to the following main steps:

- Systematic review of the incidence and prevalence of psoriasis;
- Descriptive summary of incidence data;
- Development of a hierarchical model to estimate the global, regional and country-specific prevalence of psoriasis

## Text 2: Systematic review of the incidence and prevalence of psoriasis

A systematic review of population-based epidemiologic studies was conducted to examine the incidence and prevalence of psoriasis. Eligible studies reported on the prevalence and/or incidence of psoriasis from cross-sectional surveys or cohorts of representative (general) populations of a country or area of a country. Studies were excluded if they:

- were not on human beings.
- were not carried out on the general population (i.e. people were identified from specific populations such as dermatology clinics, or specific subgroups of the population).
- focused only on psoriatic arthritis.

Six electronic (MEDLINE, EMBASE, Web of Science, SciELO, Korean Journal Databases and Russian Science Citation Index) and five regional (WPRIM, SaudiMedLit, Informit, IndMed, and HERDIN) databases were systematically searched by the authors (R.P and I.Y.K.I) from their respective inception dates to October 7<sup>th</sup>, 2019 (MEDLINE and EMBASE) and October 15<sup>th</sup>, 2019 (Web of Science, SciELO, Korean Journal Databases and Russian Science Citation Index). Studies from any country in the world and/or in any language were included if they met the inclusion criteria. No restriction on the type of population regarding age, gender, and severity of psoriasis or regarding type of diagnosis (self-reported, physician diagnosis or dermatologist diagnosis) was applied. In addition, the reference list of all eligible studies and of relevant review articles were screened to identify other eligible studies not identified from the systematic search of the electronic and regional databases. When necessary, authors from published studies were contacted to retrieve additional information not reported in the published papers. The methodology for this systematic review is described in eFigure 1 as a PRISMA (Preferred Reporting Items for Systematic Reviews and Meta-Analyses) flowchart with a PRISMA checklist in eTable 12.

The search strategy for the systematic review is described in the following sections:

- 2.1 Developing the search strategy.
- 2.2 Final search strategy.
- 2.3 Results and discussions.
- 2.4 Data extraction.

**Text 2.1 Developing the search strategy**

The search strategy was required to capture epidemiological studies of psoriasis. The search excluded animal studies. Several approaches to capture the search concepts were developed and tested out in Ovid MEDLINE. The objective was to achieve a focused strategy that would identify epidemiological studies of psoriasis. To achieve this, various indexing options were used. The strategy had to take account of the variability in the way authors describe their research and indexers index research with Medical Subject Headings (MeSH). After several iterations, checking the impact of changes at each stage, a strategy with the following elements was agreed for Ovid MEDLINE:

1. Searching for the occurrence of a MeSH psoriasis term expressed as a text word in the title, original title, abstract or subject heading of a record, e.g.  
(psoriasis.mp.) or (exp psoriasis/)
2. Searching for the occurrence of MeSH terms synonyms to psoriasis expressed as a text word in the title, original title, abstract or subject heading of a record, e.g.  
(psoriatic skin.mp.) / or (pustulosis.mp.) /or (pustulo\*.mp. AND palm\*.mp.)
3. Searching for the occurrence of a MeSH psoriasis term along with the occurrence of an epidemiological MeSH term or study design MeSH term in the same record expressed as a text word in the title, original title, abstract or subject heading of a record, e.g.  
exp psoriasis/ AND (epidemiology / or incidence/ or prevalence/ or cohort study/ or follow-up study/ or prospective study/ or longitudinal study / or cross-sectional study).mp.
4. Removing studies about animals by limiting studies to humans.

Once agreed, the MEDLINE strategy was adapted for use in EMBASE, Web of Science, SciELO, Korean Journal databases, and Russian Science Citation Index. The search strategy was limited to using the keyword "psoriasis" when searching the regional databases as they do not use MeSH for indexing.

The following databases were searched:

- Ovid MEDLINE (R) 1946 to 2019 October 07;
- Ovid Embase 1974 to 2019 October 07;
- Web of Science Inception to 2019 October 15;
- Web of Science - SciELO Inception to 2019 October 15;
- Web of Science - KCI Korean Journal Database Inception to 2019 October 15;
- Web of Science - Russian Science Citation Index Inception to 2019 October 15;
- Western Pacific Region Index Medicus (WPRIM);
- Saudi Medical Literature (SaudiMedLit);
- Informit;
- Indian Medlars Centre (IndMed);
- Health Research and Development Information Network (HERDIN)

Records identified from each electronic and regional database were downloaded into a separate Endnote bibliographic database, which were then combined to generate a single large Endnote bibliography containing all the records identified from all the databases in which duplicate records were removed.

**Text 2.2 Final search strategy**

The final search strategies and results are shown below.

Box 1

|      |                                                                                                                                             |
|------|---------------------------------------------------------------------------------------------------------------------------------------------|
| Exp  | Explodes a MeSH to capture more specific MeSH.                                                                                              |
| /    | Indicates that the search term is a Medical Subject Heading (MeSH).                                                                         |
| AND  | Achieves a Boolean AND Combination.                                                                                                         |
| OR   | Achieves a Boolean OR Combination.                                                                                                          |
| .mp. | Searches for the term expressed in the title, original title, abstract, and subject heading.                                                |
| *    | Truncation operator, searches for words beginning with the stem, e.g. epidemiol* retrieves epidemiology, epidemiological and epidemiologic. |

### 2.2.1 Medline search

Database: Ovid MEDLINE (R) 1946 to Present. Searched 07/10/2019

|    |                                                                                                                                                                                                                                                                                                                 |         |
|----|-----------------------------------------------------------------------------------------------------------------------------------------------------------------------------------------------------------------------------------------------------------------------------------------------------------------|---------|
| 1  | psoriasis.mp. [mp=title, abstract, original title, name of substance word, subject heading word, floating sub-heading word, keyword heading word, organism supplementary concept word, protocol supplementary concept word, rare disease supplementary concept word, unique identifier, synonyms]               | 41387   |
| 2  | exp Psoriasis/                                                                                                                                                                                                                                                                                                  | 38323   |
| 3  | psoria*.mp. [mp=title, abstract, original title, name of substance word, subject heading word, floating sub-heading word, keyword heading word, organism supplementary concept word, protocol supplementary concept word, rare disease supplementary concept word, unique identifier, synonyms]                 | 46587   |
| 4  | pustulo*.mp. [mp=title, abstract, original title, name of substance word, subject heading word, floating sub-heading word, keyword heading word, organism supplementary concept word, protocol supplementary concept word, rare disease supplementary concept word, unique identifier, synonyms]                | 2524    |
| 5  | palm*.mp. [mp=title, abstract, original title, name of substance word, subject heading word, floating sub-heading word, keyword heading word, organism supplementary concept word, protocol supplementary concept word, rare disease supplementary concept word, unique identifier, synonyms]                   | 75678   |
| 6  | 4 and 5                                                                                                                                                                                                                                                                                                         | 777     |
| 7  | pustulosis.mp. [mp=title, abstract, original title, name of substance word, subject heading word, floating sub-heading word, keyword heading word, organism supplementary concept word, protocol supplementary concept word, rare disease supplementary concept word, unique identifier, synonyms]              | 1989    |
| 8  | 1 or 2 or 3 or 6 or 7                                                                                                                                                                                                                                                                                           | 47851   |
| 9  | (incidence or incident).mp. [mp=title, abstract, original title, name of substance word, subject heading word, floating sub-heading word, keyword heading word, organism supplementary concept word, protocol supplementary concept word, rare disease supplementary concept word, unique identifier, synonyms] | 765711  |
| 10 | exp Incidence/                                                                                                                                                                                                                                                                                                  | 248731  |
| 11 | incidence stud*.mp. [mp=title, abstract, original title, name of substance word, subject heading word, floating sub-heading word, keyword heading word, organism supplementary concept word, protocol supplementary concept word, rare disease supplementary concept word, unique identifier, synonyms]         | 1435    |
| 12 | cohort stud*.mp. [mp=title, abstract, original title, name of substance word, subject heading word, floating sub-heading word, keyword heading word, organism supplementary concept word, protocol supplementary concept word, rare disease supplementary concept word, unique identifier, synonyms]            | 331045  |
| 13 | exp Cohort Studies/                                                                                                                                                                                                                                                                                             | 1902813 |

|    |                                                                                                                                                                                                                                                                                                                   |         |
|----|-------------------------------------------------------------------------------------------------------------------------------------------------------------------------------------------------------------------------------------------------------------------------------------------------------------------|---------|
| 14 | exp Follow-Up Studies/                                                                                                                                                                                                                                                                                            | 622943  |
| 15 | follow-up stud*.mp. [mp=title, abstract, original title, name of substance word, subject heading word, floating sub-heading word, keyword heading word, organism supplementary concept word, protocol supplementary concept word, rare disease supplementary concept word, unique identifier, synonyms]           | 640176  |
| 16 | prospective stud*.mp. [mp=title, abstract, original title, name of substance word, subject heading word, floating sub-heading word, keyword heading word, organism supplementary concept word, protocol supplementary concept word, rare disease supplementary concept word, unique identifier, synonyms]         | 564483  |
| 17 | exp Prospective Studies/                                                                                                                                                                                                                                                                                          | 514719  |
| 18 | longitudinal stud*.mp. [mp=title, abstract, original title, name of substance word, subject heading word, floating sub-heading word, keyword heading word, organism supplementary concept word, protocol supplementary concept word, rare disease supplementary concept word, unique identifier, synonyms]        | 151981  |
| 19 | exp Longitudinal Studies/                                                                                                                                                                                                                                                                                         | 127011  |
| 20 | (epidemiol* adj stud*).mp. [mp=title, abstract, original title, name of substance word, subject heading word, floating sub-heading word, keyword heading word, organism supplementary concept word, protocol supplementary concept word, rare disease supplementary concept word, unique identifier, synonyms]    | 80932   |
| 21 | exp Epidemiologic Studies/                                                                                                                                                                                                                                                                                        | 2368113 |
| 22 | exp Epidemiology/                                                                                                                                                                                                                                                                                                 | 26087   |
| 23 | (prevalence or prevalent).mp. [mp=title, abstract, original title, name of substance word, subject heading word, floating sub-heading word, keyword heading word, organism supplementary concept word, protocol supplementary concept word, rare disease supplementary concept word, unique identifier, synonyms] | 678455  |
| 24 | exp Prevalence/                                                                                                                                                                                                                                                                                                   | 275313  |
| 25 | prevalence stud*.mp. [mp=title, abstract, original title, name of substance word, subject heading word, floating sub-heading word, keyword heading word, organism supplementary concept word, protocol supplementary concept word, rare disease supplementary concept word, unique identifier, synonyms]          | 4476    |
| 26 | exp Cross-Sectional Studies/                                                                                                                                                                                                                                                                                      | 304821  |
| 27 | cross-sectional stud*.mp. [mp=title, abstract, original title, name of substance word, subject heading word, floating sub-heading word, keyword heading word, organism supplementary concept word, protocol supplementary concept word, rare disease supplementary concept word, unique identifier, synonyms]     | 321665  |
| 28 | 9 or 10 or 11 or 12 or 13 or 14 or 15 or 16 or 17 or 18 or 19 or 20 or 21 or 22 or 23 or 24 or 25 or 26 or 27                                                                                                                                                                                                     | 3384172 |

|    |                                |      |
|----|--------------------------------|------|
| 29 | 8 and 28                       | 9185 |
| 30 | limit 29 to humans             | 9152 |
| 31 | limit 30 to yr="2011 -Current" | 4987 |
| 32 | limit 30 to yr="1902 - 2000"   | 1660 |
| 33 | limit 30 to yr="2001 - 2005"   | 963  |
| 34 | limit 30 to yr="2006 - 2010"   | 1542 |
| 35 | limit 30 to yr="2011 - 2013"   | 1462 |
| 36 | limit 30 to yr="2014 - 2015"   | 1236 |
| 37 | limit 30 to yr="2016 -Current" | 2289 |
| 38 | limit 30 to yr="2017 - 2019"   | 1580 |

### 2.2.2 EMBASE search

Database: EMBASE Ovid SP 1974 to Present. Searched 07/10/2019

|    |                                                                                                                                                                                                                    |         |
|----|--------------------------------------------------------------------------------------------------------------------------------------------------------------------------------------------------------------------|---------|
| 1  | psoriasis.mp. [mp=title, abstract, heading word, drug trade name, original title, device manufacturer, drug manufacturer, device trade name, keyword, floating subheading word, candidate term word]               | 76843   |
| 2  | exp Psoriasis/                                                                                                                                                                                                     | 84003   |
| 3  | psoria*.mp. [mp=title, abstract, heading word, drug trade name, original title, device manufacturer, drug manufacturer, device trade name, keyword, floating subheading word, candidate term word]                 | 91087   |
| 4  | pustulo*.mp. [mp=title, abstract, heading word, drug trade name, original title, device manufacturer, drug manufacturer, device trade name, keyword, floating subheading word, candidate term word]                | 5523    |
| 5  | palm*.mp. [mp=title, abstract, heading word, drug trade name, original title, device manufacturer, drug manufacturer, device trade name, keyword, floating subheading word, candidate term word]                   | 114045  |
| 6  | 4 and 5                                                                                                                                                                                                            | 2292    |
| 7  | pustulosis.mp. [mp=title, abstract, heading word, drug trade name, original title, device manufacturer, drug manufacturer, device trade name, keyword, floating subheading word, candidate term word]              | 4896    |
| 8  | 1 or 2 or 3 or 6 or 7                                                                                                                                                                                              | 94462   |
| 9  | (incidence or incident).mp. [mp=title, abstract, heading word, drug trade name, original title, device manufacturer, drug manufacturer, device trade name, keyword, floating subheading word, candidate term word] | 1226577 |
| 10 | exp Incidence/                                                                                                                                                                                                     | 448654  |
| 11 | incidence stud*.mp. [mp=title, abstract, heading word, drug trade name, original title, device manufacturer, drug manufacturer, device trade name, keyword, floating subheading word, candidate term word]         | 2082    |
| 12 | cohort stud*.mp. [mp=title, abstract, heading word, drug trade name, original title, device manufacturer, drug manufacturer, device trade name, keyword, floating subheading word, candidate term word]            | 280908  |
| 13 | exp Cohort Studies/                                                                                                                                                                                                | 516485  |

|    |                                                                                                                                                                                                                      |         |
|----|----------------------------------------------------------------------------------------------------------------------------------------------------------------------------------------------------------------------|---------|
| 14 | exp Follow-Up Studies/                                                                                                                                                                                               | 1466518 |
| 15 | follow-up stud*.mp. [mp=title, abstract, heading word, drug trade name, original title, device manufacturer, drug manufacturer, device trade name, keyword, floating subheading word, candidate term word]           | 64830   |
| 16 | prospective stud*.mp. [mp=title, abstract, heading word, drug trade name, original title, device manufacturer, drug manufacturer, device trade name, keyword, floating subheading word, candidate term word]         | 646951  |
| 17 | exp Prospective Studies/                                                                                                                                                                                             | 557139  |
| 18 | longitudinal stud*.mp. [mp=title, abstract, heading word, drug trade name, original title, device manufacturer, drug manufacturer, device trade name, keyword, floating subheading word, candidate term word]        | 165376  |
| 19 | exp Longitudinal Studies/                                                                                                                                                                                            | 131777  |
| 20 | (epidemiol* adj stud*).mp. [mp=title, abstract, heading word, drug trade name, original title, device manufacturer, drug manufacturer, device trade name, keyword, floating subheading word, candidate term word]    | 112075  |
| 21 | exp Epidemiologic Studies/                                                                                                                                                                                           | 3246761 |
| 22 | exp Epidemiology/                                                                                                                                                                                                    | 3246761 |
| 23 | (prevalence or prevalent).mp. [mp=title, abstract, heading word, drug trade name, original title, device manufacturer, drug manufacturer, device trade name, keyword, floating subheading word, candidate term word] | 1155371 |
| 24 | exp Prevalence/                                                                                                                                                                                                      | 704953  |
| 25 | prevalence stud*.mp. [mp=title, abstract, heading word, drug trade name, original title, device manufacturer, drug manufacturer, device trade name, keyword, floating subheading word, candidate term word]          | 7099    |
| 26 | exp Cross-Sectional Studies/                                                                                                                                                                                         | 320307  |
| 27 | cross-sectional stud*.mp. [mp=title, abstract, heading word, drug trade name, original title, device manufacturer, drug manufacturer, device trade name, keyword, floating subheading word, candidate term word]     | 364681  |
| 28 | 9 or 10 or 11 or 12 or 13 or 14 or 15 or 16 or 17 or 18 or 19 or 20 or 21 or 22 or 23 or 24 or 25 or 26 or 27                                                                                                        | 5852834 |

|    |                                 |       |
|----|---------------------------------|-------|
| 29 | 8 and 28                        | 23423 |
| 30 | limit 29 to humans              | 22049 |
| 31 | limit 30 to yr="2011 - Current" | 17013 |
| 32 | limit 30 to yr="1902 - 2000"    | 1152  |
| 33 | limit 30 to yr="2001 - 2005"    | 1280  |
| 34 | limit 30 to yr="2006 - 2010"    | 2592  |
| 35 | limit 30 to yr="2011 - 2013"    | 4005  |
| 36 | limit 30 to yr="2014 - 2015"    | 3577  |
| 37 | limit 30 to yr="2016 - Current" | 9431  |
| 38 | limit 30 to yr="2017"           | 2368  |
| 39 | limit 30 to yr="2018"           | 2465  |
| 40 | limit 30 to yr="2019"           | 2461  |
| 41 | 38 or 39 or 40                  | 7294  |



### 2.2.3 Web of Science search

Database: Web of Science Inception to Present. Searched 15/10/2019

|      |             |                                                                                                                                                                                                                               |
|------|-------------|-------------------------------------------------------------------------------------------------------------------------------------------------------------------------------------------------------------------------------|
| # 20 | (2457)      | #18<br>Indexes=SCI-EXPANDED, SSCI, A&HCI, CPCI-S, CPCI-SSH, BKCI-S, BKCI-SSH, ESCI, CCR-EXPANDED, IC Timespan=1900-2010                                                                                                       |
| #19  | (5,950)     | #18<br>Indexes=SCI-EXPANDED, SSCI, A&HCI, CPCI-S, CPCI-SSH, BKCI-S, BKCI-SSH, ESCI, CCR-EXPANDED, IC Timespan=2011-2019                                                                                                       |
| #18  | (8,407)     | #17 AND #5<br>Indexes=SCI-EXPANDED, SSCI, A&HCI, CPCI-S, CPCI-SSH, BKCI-S, BKCI-SSH, ESCI, CCR-EXPANDED, IC Timespan=All years                                                                                                |
| #17  | (3,590,542) | #16 OR #15 OR #14 OR #13 OR #12 OR #11 OR #10 OR #9 OR #8 OR #7 OR #6<br>Indexes=SCI-EXPANDED, SSCI, A&HCI, CPCI-S, CPCI-SSH, BKCI-S, BKCI-SSH, ESCI, CCR-EXPANDED, IC Timespan=All years                                     |
| #16  | (306,143)   | TS=(cross-sectional study OR cross-sectional studies OR cross sectional study OR cross sectional studies)<br>Indexes=SCI-EXPANDED, SSCI, A&HCI, CPCI-S, CPCI-SSH, BKCI-S, BKCI-SSH, ESCI, CCR-EXPANDED, IC Timespan=All years |
| #15  | (554,136)   | TS=(prevalence study or prevalence studies)<br>Indexes=SCI-EXPANDED, SSCI, A&HCI, CPCI-S, CPCI-SSH, BKCI-S, BKCI-SSH, ESCI, CCR-EXPANDED, IC Timespan=All years                                                               |
| #14  | (990,959)   | TS=(prevalence OR prevalent)<br>Indexes=SCI-EXPANDED, SSCI, A&HCI, CPCI-S, CPCI-SSH, BKCI-S, BKCI-SSH, ESCI, CCR-EXPANDED, IC Timespan=All years                                                                              |
| #13  | (340,908)   | TS=(epidemiology)<br>Indexes=SCI-EXPANDED, SSCI, A&HCI, CPCI-S, CPCI-SSH, BKCI-S, BKCI-SSH, ESCI, CCR-EXPANDED, IC Timespan=All years                                                                                         |
| #12  | (335,154)   | TS=(epidemiolo* study or epidemiolo* studies)<br>Indexes=SCI-EXPANDED, SSCI, A&HCI, CPCI-S, CPCI-SSH, BKCI-S, BKCI-SSH, ESCI, CCR-EXPANDED, IC Timespan=All years                                                             |
| #11  | (273,094)   | TS=(longitudinal study or longitudinal studies)<br>Indexes=SCI-EXPANDED, SSCI, A&HCI, CPCI-S, CPCI-SSH, BKCI-S, BKCI-SSH, ESCI, CCR-EXPANDED, IC Timespan=All years                                                           |
| #10  | (496,164)   | TS=(prospective study or prospective studies)<br>Indexes=SCI-EXPANDED, SSCI, A&HCI, CPCI-S, CPCI-SSH, BKCI-S, BKCI-SSH, ESCI, CCR-EXPANDED, IC Timespan=All years                                                             |
| #9   | (796,061)   | TS=(follow-up study or follow-up studies or follow up study or follow up studies)<br>Indexes=SCI-EXPANDED, SSCI, A&HCI, CPCI-S, CPCI-SSH, BKCI-S, BKCI-SSH, ESCI, CCR-EXPANDED, IC Timespan=All years                         |

|    |           |                                                                                                                                                               |
|----|-----------|---------------------------------------------------------------------------------------------------------------------------------------------------------------|
| #8 | (519,474) | TS=(cohort study or cohort studies)<br>Indexes=SCI-EXPANDED, SSCI, A&HCI, CPCI-S, CPCI-SSH, BKCI-S, BKCI-SSH, ESCI, CCR-EXPANDED, IC Timespan=All years       |
| #7 | (419,556) | TS=(incidence study or incidence studies)<br>Indexes=SCI-EXPANDED, SSCI, A&HCI, CPCI-S, CPCI-SSH, BKCI-S, BKCI-SSH, ESCI, CCR-EXPANDED, IC Timespan=All years |
| #6 | (925,072) | TS=(incidence OR incident)<br>Indexes=SCI-EXPANDED, SSCI, A&HCI, CPCI-S, CPCI-SSH, BKCI-S, BKCI-SSH, ESCI, CCR-EXPANDED, IC Timespan=All years                |
| #5 | (55,453)  | #4 OR #3 OR #2 OR #1<br>Indexes=SCI-EXPANDED, SSCI, A&HCI, CPCI-S, CPCI-SSH, BKCI-S, BKCI-SSH, ESCI, CCR-EXPANDED, IC Timespan=All years                      |
| #4 | (951)     | TS=(pustulo* AND palm*)<br>Indexes=SCI-EXPANDED, SSCI, A&HCI, CPCI-S, CPCI-SSH, BKCI-S, BKCI-SSH, ESCI, CCR-EXPANDED, IC Timespan=All years                   |
| #3 | (2,611)   | TS=(pustulosis)<br>Indexes=SCI-EXPANDED, SSCI, A&HCI, CPCI-S, CPCI-SSH, BKCI-S, BKCI-SSH, ESCI, CCR-EXPANDED, IC Timespan=All years                           |
| #2 | (7,039)   | TS=(psoriatic skin)<br>Indexes=SCI-EXPANDED, SSCI, A&HCI, CPCI-S, CPCI-SSH, BKCI-S, BKCI-SSH, ESCI, CCR-EXPANDED, IC Timespan=All years                       |
| #1 | (51,367)  | TS=(psoriasis)<br>Indexes=SCI-EXPANDED, SSCI, A&HCI, CPCI-S, CPCI-SSH, BKCI-S, BKCI-SSH, ESCI, CCR-EXPANDED, IC Timespan=All years                            |

#### 2.2.4 SciELO search

Database: Web of Science SciELO Inception to Present. Searched 15/10/2019

|      |          |                                                                                                                                                |
|------|----------|------------------------------------------------------------------------------------------------------------------------------------------------|
| # 20 | (17)     | #18<br>Indexes=SCIELO Timespan=1997-2010                                                                                                       |
| # 19 | (101)    | #18<br>Indexes=SCIELO Timespan=2011-2019                                                                                                       |
| # 18 | (118)    | #17 AND #5<br>Indexes=SCIELO Timespan=All years                                                                                                |
| # 17 | (89,084) | #16 OR #15 OR #14 OR #13 OR #12 OR #11 OR #10 OR #9 OR #8 OR #7 OR #6<br>Indexes=SCIELO Timespan=All years                                     |
| # 16 | (22,483) | TS=(cross-sectional study OR cross-sectional studies OR cross sectional study OR cross sectional studies)<br>Indexes=SCIELO Timespan=All years |
| # 15 | (20,691) | TS=(prevalence study or prevalence studies)<br>Indexes=SCIELO Timespan=All years                                                               |
| # 14 | (30,467) | TS=(prevalence OR prevalent)<br>Indexes=SCIELO Timespan=All years                                                                              |
| # 13 | (8,586)  | TS=(epidemiology)<br>Indexes=SCIELO Timespan=All years                                                                                         |
| # 12 | (13,770) | TS=(epidemiolo* study or epidemiolo* studies)<br>Indexes=SCIELO Timespan=All years                                                             |
| # 11 | (5,094)  | TS=(longitudinal study or longitudinal studies)<br>Indexes=SCIELO Timespan=All years                                                           |
| # 10 | (9,697)  | TS=(prospective study or prospective studies)                                                                                                  |

|     |          |                                                                                                                        |
|-----|----------|------------------------------------------------------------------------------------------------------------------------|
|     |          | Indexes=SCIELO Timespan=All years                                                                                      |
| # 9 | (12,078) | TS=(follow-up study or follow-up studies or follow up study or follow up studies)<br>Indexes=SCIELO Timespan=All years |
| # 8 | (6,084)  | TS=(cohort study or cohort studies)<br>Indexes=SCIELO Timespan=All years                                               |
| # 7 | (11,150) | TS=(incidence study or incidence studies)<br>Indexes=SCIELO Timespan=All years                                         |
| # 6 | (18,609) | TS=(incidence OR incident)<br>Indexes=SCIELO Timespan=All years                                                        |
| # 5 | (392)    | #4 OR #3 OR #2 OR #1<br>Indexes=SCIELO Timespan=All years                                                              |
| # 4 | (8)      | TS=(pustulo* AND palm*)<br>Indexes=SCIELO Timespan=All years                                                           |
| # 3 | (29)     | TS=(pustulosis)<br>Indexes=SCIELO Timespan=All years                                                                   |
| # 2 | (40)     | TS=(psoriatic skin)<br>Indexes=SCIELO Timespan=All years                                                               |
| # 1 | (369)    | TS=(psoriasis)<br>Indexes=SCIELO Timespan=All years                                                                    |

### 2.2.5 KCI search

Database: Web of Science KCI Korean Journal Database Inception to Present. Searched 15/10/2019

|      |          |                                                                                                                                             |
|------|----------|---------------------------------------------------------------------------------------------------------------------------------------------|
| # 20 | (16)     | #18<br>Indexes=KJD Timespan=1980-2010                                                                                                       |
| # 19 | (47)     | #18<br>Indexes=KJD Timespan=2011-2019                                                                                                       |
| # 18 | (63)     | #17 AND #5<br>Indexes=KJD Timespan=All years                                                                                                |
| # 17 | (81,179) | #16 OR #15 OR #14 OR #13 OR #12 OR #11 OR #10 OR #9 OR #8 OR #7 OR #6<br>Indexes=KJD Timespan=All years                                     |
| # 16 | (6,047)  | TS=(cross-sectional study OR cross-sectional studies OR cross sectional study OR cross sectional studies)<br>Indexes=KJD Timespan=All years |
| # 15 | (8,123)  | TS=(prevalence study or prevalence studies)<br>Indexes=KJD Timespan=All years                                                               |
| # 14 | (15,382) | TS=(prevalence OR prevalent)<br>Indexes=KJD Timespan=All years                                                                              |
| # 13 | (1,798)  | TS=(epidemiology)<br>Indexes=KJD Timespan=All years                                                                                         |
| # 12 | (3,151)  | TS=(epidemiolo* study or epidemiolo* studies)<br>Indexes=KJD Timespan=All years                                                             |
| # 11 | (6,471)  | TS=(longitudinal study or longitudinal studies)<br>Indexes=KJD Timespan=All years                                                           |
| # 10 | (5,501)  | TS=(prospective study or prospective studies)<br>Indexes=KJD Timespan=All years                                                             |
| # 9  | (29,955) | TS=(follow-up study or follow-up studies or follow up study or follow up studies)<br>Indexes=KJD Timespan=All years                         |
| # 8  | (3,194)  | TS=(cohort study or cohort studies)<br>Indexes=KJD Timespan=All years                                                                       |
| # 7  | (8,487)  | TS=(incidence study or incidence studies)<br>Indexes=KJD Timespan=All years                                                                 |
| # 6  | (20,775) | TS=(incidence OR incident)<br>Indexes=KJD Timespan=All years                                                                                |

|     |       |                                                           |
|-----|-------|-----------------------------------------------------------|
| # 5 | (535) | #4 OR #3 OR #2 OR #1<br>Indexes=KJD Timespan=All years    |
| # 4 | (19)  | TS=(pustulo* AND palm*)<br>Indexes=KJD Timespan=All years |
| # 3 | (66)  | TS=(pustulosis)<br>Indexes=KJD Timespan=All years         |
| # 2 | (53)  | TS=(psoriatic skin)<br>Indexes=KJD Timespan=All years     |
| # 1 | (469) | TS=(psoriasis)<br>Indexes=KJD Timespan=All years          |

### 2.2.6 Russian Science Citation Index search

Database: Web of Science Russian Science Citation Inception to Present. Searched 15/10/2019

|      |          |                                                                                                                                              |
|------|----------|----------------------------------------------------------------------------------------------------------------------------------------------|
| # 20 | (12)     | #18<br>Indexes=RSCI Timespan=2005-2010                                                                                                       |
| # 19 | (69)     | #18<br>Indexes=RSCI Timespan=2011-2019                                                                                                       |
| # 18 | (81)     | #17 AND #5<br>Indexes=RSCI Timespan=All years                                                                                                |
| # 17 | (22,739) | #16 OR #15 OR #14 OR #13 OR #12 OR #11 OR #10 OR #9 OR #8 OR #7 OR #6<br>Indexes=RSCI Timespan=All years                                     |
| # 16 | (467)    | TS=(cross-sectional study OR cross-sectional studies OR cross sectional study OR cross sectional studies)<br>Indexes=RSCI Timespan=All years |
| # 15 | (3,823)  | TS=(prevalence study or prevalence studies)<br>Indexes=RSCI Timespan=All years                                                               |
| # 14 | (7,442)  | TS=(prevalence OR prevalent)<br>Indexes=RSCI Timespan=All years                                                                              |
| # 13 | (2,012)  | TS=(epidemiology)<br>Indexes=RSCI Timespan=All years                                                                                         |
| # 12 | (2,520)  | TS=(epidemiolo* study or epidemiolo* studies)<br>Indexes=RSCI Timespan=All years                                                             |
| # 11 | (1,172)  | TS=(longitudinal study or longitudinal studies)<br>Indexes=RSCI Timespan=All years                                                           |

|      |         |                                                                                                                      |
|------|---------|----------------------------------------------------------------------------------------------------------------------|
| # 10 | (2,513) | TS=(prospective study or prospective studies)<br>Indexes=RSCI Timespan=All years                                     |
| # 9  | (4,128) | TS=(follow-up study or follow-up studies or follow up study or follow up studies)<br>Indexes=RSCI Timespan=All years |
| # 8  | (1,222) | TS=(cohort study or cohort studies)<br>Indexes=RSCI Timespan=All years                                               |
| # 7  | (3,318) | TS=(incidence study or incidence studies)<br>Indexes=RSCI Timespan=All years                                         |
| # 6  | (6,700) | TS=(incidence OR incident)<br>Indexes=RSCI Timespan=All years                                                        |
| # 5  | (548)   | #4 OR #3 OR #2 OR #1<br>Indexes=RSCI Timespan=All years                                                              |
| # 4  | (3)     | TS=(pustulo* AND palm*)<br>Indexes=RSCI Timespan=All years                                                           |
| # 3  | (6)     | TS=(pustulosis)<br>Indexes=RSCI Timespan=All years                                                                   |
| # 2  | (84)    | TS=(psoriatic skin)<br>Indexes=RSCI Timespan=All years                                                               |
| # 1  | (539)   | TS=(psoriasis)<br>Indexes=RSCI Timespan=All years                                                                    |



### **Text 2.3 Results and Discussion**

In total, 42,924 records were identified from the electronic and regional databases as well as from screening the reference lists of all eligible studies. After de-duplication, 41,164 records were available for assessment. These results were provided as an Endnote library.

| Database                                     | Records downloaded | Records remaining after de-duplication |
|----------------------------------------------|--------------------|----------------------------------------|
| <i>Electronic Databases</i>                  |                    |                                        |
| MEDLINE*                                     | 9,472              | 8,830                                  |
| EMBASE*                                      | 23,278             | 22,178                                 |
| Web of Science                               | 8,407              | 8,389                                  |
| SciELO                                       | 118                | 118                                    |
| Korean Journal Database                      | 63                 | 63                                     |
| Russian Science Citation Index               | 81                 | 81                                     |
| Total                                        | 41,419             | 39,659                                 |
| <i>Regional Databases</i>                    |                    |                                        |
| WPRIM                                        | 957                | 957                                    |
| SaudiMedLit                                  | 25                 | 25                                     |
| Informit                                     | 98                 | 98                                     |
| IndMed                                       | 344                | 344                                    |
| HERDIN                                       | 58                 | 58                                     |
| Total                                        | 1482               | 1482                                   |
| <i>Additional papers identified manually</i> |                    |                                        |
| Total                                        | 23                 | 23                                     |
| Totals                                       | 42,924             | 41,164                                 |

\* The total number of records downloaded from MEDLINE and EMBASE as presented in this table are not identical to numbers presented in the search strategies 2.2.1 and 2.2.2, respectively, because the systematic review search was conducted twice, first in October 2017 and then updated in October 2019. However, due to the large number of records identified from these two databases, we restricted the search to 2017-2019 when we conducted the update for the systematic review and added the number of new records identified to the number of records identified previously in the first search. Consequently, the number of records presented in this table are slightly different from the number of records presented in the search strategies

### **Text 2.4 Data Extraction:**

Data extracted from each study included citation data (title of the study, authors, publication year); study design (study aim, study-period, setting, database and disease codes [if a specific database and disease codes have been used]); study population (country, ethnicity, age group, gender); study methods (diagnostic method [e.g. dermatologists, physician or self-reported], case definition and validation); outcome measure (incidence and/or prevalence); type of prevalence (point, period or life-time); and findings (number of people with psoriasis, number of people at risk, values of the prevalence and/or incidence reported and their 95% confidence intervals[CIs]). All extracted data were double-checked by two investigators (R.P and I.Y.K.I) to ensure its accuracy.

### **Text 2.5 Quality Assessment:**

A formal assessment of the quality of the included studies was performed independently by two members of the research team (R.P. and I.Y.K.I) using the Appraisal tool of Cross-Sectional Studies (AXIS tool)<sup>1</sup>. The AXIS tool is a 20-item quality assessment tool designed to assist researchers to critically appraise studies, specifically in the process of conducting systemic reviews. The 20-items cover the following domains: identification of research aims, appropriateness of study design, use of valid measures and statistical analyses and consideration of bias. In the current systematic review, studies were classified as having high, medium, or low risk of bias or unclear according to the overall quality of the

methods used and reporting of results in the study. The risk of bias assessment for individual studies is included in eTable 14.

| The Appraisal tool of Cross-Sectional Studies (AXIS tool) <sup>1</sup>                                                                                   |     |    |                          |
|----------------------------------------------------------------------------------------------------------------------------------------------------------|-----|----|--------------------------|
|                                                                                                                                                          | Yes | No | Do not know/<br>Comments |
| <i>Introduction</i>                                                                                                                                      |     |    |                          |
| 1) Were the aims/objectives of the study clear?                                                                                                          |     |    |                          |
| <i>Methods</i>                                                                                                                                           |     |    |                          |
| 2) Was the study design appropriate for the stated aim(s)?                                                                                               |     |    |                          |
| 3) Was the sample size justified?                                                                                                                        |     |    |                          |
| 4) Was the target/reference population clearly defined? (Is it clear who the research was about?)                                                        |     |    |                          |
| 5) Was the sample frame taken from an appropriate population base so that it closely represented the target/reference population under investigation?    |     |    |                          |
| 6) Was the selection process likely to select subjects/participants that were representative of the target/reference population under investigation?     |     |    |                          |
| 7) Were measures undertaken to address and categorise non-responders?                                                                                    |     |    |                          |
| 8) Were the risk factor and outcome variables measured appropriate to the aims of the study?                                                             |     |    |                          |
| 9) Were the risk factor and outcome variables measured correctly using instruments/measurements that had been trialled, piloted or published previously? |     |    |                          |
| 10) Is it clear what was used to determine statistical significance and/or precision estimates? (eg, p values, CIs)                                      |     |    |                          |
| 11) Were the methods (including statistical methods) sufficiently described to enable them to be repeated?                                               |     |    |                          |
| <i>Results</i>                                                                                                                                           |     |    |                          |
| 12) Were the basic data adequately described?                                                                                                            |     |    |                          |
| 13) Does the response rate raise concerns about non-response bias?                                                                                       |     |    |                          |
| 14) If appropriate, was information about non-responders described?                                                                                      |     |    |                          |
| 15) Were the results internally consistent?                                                                                                              |     |    |                          |
| 16) Were the results for the analyses described in the methods, presented?                                                                               |     |    |                          |
| <i>Discussion</i>                                                                                                                                        |     |    |                          |
| 17) Were the authors' discussions and conclusions justified by the results?                                                                              |     |    |                          |
| 18) Were the limitations of the study discussed?                                                                                                         |     |    |                          |
| <i>Other</i>                                                                                                                                             |     |    |                          |
| 19) Were there any funding sources or conflicts of interest that may affect the authors' interpretation of the results?                                  |     |    |                          |
| 20) Was ethical approval or consent of participants attained?                                                                                            |     |    |                          |

**eTable 1 Characteristics of studies reporting on incidence of psoriasis.**

| Country | Study                   | Study time | Study outcome          | Risk of bias | Reference                                                                                                                                                                                                                                                                                                                                                                   |
|---------|-------------------------|------------|------------------------|--------------|-----------------------------------------------------------------------------------------------------------------------------------------------------------------------------------------------------------------------------------------------------------------------------------------------------------------------------------------------------------------------------|
| Canada  | Eder et al. (2017)      | 2000-2015  | Prevalence & Incidence | Medium       | Eder L, Widdifield J, Rosen CF, Gladman DD, Alhusayen R, Paterson M, et al. Increasing population burden of psoriatic disease in Ontario, Canada-a longitudinal cohort study. <i>Arthritis and Rheumatology Conference: American College of Rheumatology/Association of Rheumatology Health Professionals Annual Scientific Meeting, ACR/ARHP</i> . 2017;69(Supplement 10). |
| Canada  | Eder et al. (2019)      | 2000-2015  | Prevalence & Incidence | Low          | Eder L, Widdifield J, Rosen CF, Cook R, Lee KA, Alhusayen R, et al. Trends in the Prevalence and Incidence of Psoriasis and Psoriatic Arthritis in Ontario, Canada: A Population-Based Study. <i>Arthritis Care and Research</i> . 2019;71(8):1084-91.                                                                                                                      |
| Denmark | Egeberg et al. (2017)   | 2003-2012  | Prevalence & Incidence | Low          | Egeberg A, Skov L, Gislasen GH, Thyssen JP, Mallbris L. Incidence and prevalence of psoriasis in Denmark. <i>ActaDermato-Venereologica</i> . 2017;97(7):808-12.                                                                                                                                                                                                             |
| Germany | Jacob et al. (2016)     | 2007-2010  | Prevalence & Incidence | High         | Jacob C, Meier F, Neidhardt K, Jugl SM, Walker J, Braun S, et al. Epidemiology and costs of psoriasis in Germany-a retrospective claims data analysis. <i>Value in Health</i> . 2016;19(7):A566.                                                                                                                                                                            |
| Germany | Sewerin et al. (2019)   | 2009-2012  | Prevalence & Incidence | Medium       | Sewerin P, Brinks R, Schneider M, Haase I, Vordenbaumen S. Prevalence and incidence of psoriasis and psoriatic arthritis. <i>Annals of the Rheumatic Diseases</i> . 2019;78(2):286-7.                                                                                                                                                                                       |
| Israel  | Shalom et al. (2018)    | 2016-2017  | Prevalence & Incidence | Low          | Shalom G, Zisman D, Babaev M, Horev A, Tiosano S, Schonmann Y, et al. Psoriasis in Israel: demographic, epidemiology, and healthcare services utilization. <i>International Journal of Dermatology</i> . 2018;57(9):1068-74.                                                                                                                                                |
| Israel  | Schonmann et al. (2019) | 2011-2017  | Prevalence & Incidence | Low          | Schonmann Y, Ashcroft DM, Iskandar IYK, Parisi R, Sde-Or S, Comaneshter D, et al. Incidence and prevalence of psoriasis in Israel between 2011 and 2017. <i>Journal of the European Academy of Dermatology and Venereology</i> .                                                                                                                                            |

|        |                           |             |                        |     |                                                                                                                                                                                                                                                                                       |
|--------|---------------------------|-------------|------------------------|-----|---------------------------------------------------------------------------------------------------------------------------------------------------------------------------------------------------------------------------------------------------------------------------------------|
| Italy  | Vena et al. (2010)        | 2001 & 2005 | Incidence              | Low | Vena GA, Altomare G, Ayala F, Berardesca E, Calzavara-Pinton P, Chimenti S, et al. Incidence of psoriasis and association with comorbidities in Italy: A 5-year observational study from a national primary care database. <i>European Journal of Dermatology</i> . 2010;20(5):593-8. |
| Italy  | Cantarutti et al. (2015)  | 2006-2012   | Prevalence & Incidence | Low | Cantarutti A, Dona D, Visentin F, Borgia E, Scamarcia A, Cantarutti L, et al. Epidemiology of frequently occurring skin diseases in Italian children from 2006 to 2012: A retrospective, population-based study. <i>Pediatric Dermatology</i> . 2015;32(5):668-78.                    |
| Italy  | Pezzolo et al. (2019)     | 2003-2004   | Prevalence & Incidence | Low | Pezzolo E, Cazzaniga S, Colombo P et al. Psoriasis incidence and lifetime prevalence: Suggestion for a higher mortality rate in older age-classes among psoriatic patients compared to the general population in Italy. <i>Acta Dermato-Venereologica</i> 2019; 99 (4): 400-3.        |
| Russia | Znamenskaya et al. (2012) | 2009-2011   | Prevalence & Incidence | Low | Znamenskaya LF, Melekhina LY, Bogdanova YV, Mineyeva AA. Psoriasis incidence and prevalence in the Russian Federation. <i>Vestnikdermatologiiivenerologii</i> . 2012(5):20-9.                                                                                                         |
| Russia | Kubanova et al. (2017)    | 2010-2016   | Prevalence & Incidence | Low | Kubanova AA, Kubanov AA, Melekhina LE, Bogdanova EV. The Assessment of the Incidence of Skin Disorders in Russian Federation in 2003-2016. <i>Vestnik dermatologii i venerologii</i> . 2017(6):22-33.                                                                                 |
| Russia | Odinets et al. (2017)     | 2010-2016   | Prevalence & Incidence | Low | Odinets AV. The incidence of skin diseases in Stavropol territory in 2010—2016. <i>Klinicheskaya dermatologiya i venerologiya</i> . 2017;16(6):32-7.                                                                                                                                  |
| Taiwan | Wei et al. (2018)         | 2001-2013   | Prevalence & Incidence | Low | Wei JCC, Shi LH, Huang JY, Wu XF, Wu R, Chiou JY. Epidemiology and medication pattern change of psoriatic diseases in Taiwan from 2000 to 2013: A nationwide, population-based cohort study. <i>Journal of Rheumatology</i> . 2018;45(3):385-92.                                      |

|                 |                         |                  |                        |        |                                                                                                                                                                                                                                                                                                                                                                                                                          |
|-----------------|-------------------------|------------------|------------------------|--------|--------------------------------------------------------------------------------------------------------------------------------------------------------------------------------------------------------------------------------------------------------------------------------------------------------------------------------------------------------------------------------------------------------------------------|
| The Netherlands | Donker et al. (1998)    | 1987-1988 & 1995 | Incidence              | High   | Donker GA, Foets M, Spreeuwenberg P, Van Der Werf GT. Management of psoriasis in general practice now more in agreement with the guidelines of the Dutch College of General Practitioners (NHG). [Dutch]<br>Beleidsbij psoriasis in de huisartspraktijk nu meer in overeenstemming met de standaard van het Nederlands Huisartsen Genootschap.<br><i>Nederlands Tijdschrift voor Geneeskunde</i> . 1998;142(24):1379-83. |
| UK              | Huerta et al. (2007)    | 1996-1997        | Incidence              | High   | Huerta C, Rivero E, Rodriguez LAG. Incidence and risk factors for psoriasis in the general population. <i>Archives of Dermatology</i> . 2007;143(12):1559-65.                                                                                                                                                                                                                                                            |
| UK              | Khalid et al. (2013)    | 2007-2009        | Incidence              | Low    | Khalid JM, Globe G, Fox KM, Chau D, Maguire A, Chiou C-F. Treatment and referral patterns for psoriasis in United Kingdom primary care: a retrospective cohort study. <i>BMC Dermatology</i> . 2013;13:9.                                                                                                                                                                                                                |
| UK              | Springate et al. (2017) | 1999-2013        | Prevalence & Incidence | Low    | Springate DA, Parisi R, Kontopantelis E, Reeves D, Griffiths CEM, Ashcroft DM. Incidence, prevalence and mortality of patients with psoriasis: a U.K. population-based cohort study. <i>British Journal of Dermatology</i> . 2017;176(3):650-8.                                                                                                                                                                          |
| UK              | Tillett et al. (2017)   | 1998-2014        | Incidence              | Medium | Tillett W, Charlton R, Nightingale A, Snowball J, Green A, Smith C, et al. Interval between onset of psoriasis and psoriatic arthritis comparing the UK Clinical Practice Research Datalink with a hospital-based cohort. <i>Rheumatology</i> . 2017;56(12):2109-13.                                                                                                                                                     |
| USA             | Bell et al. (1991)      | 1980-1983        | Incidence              | Medium | Bell LM, Sedlack R, Beard CM, Perry HO, Michet CJ, Kurland LT. Incidence of psoriasis in Rochester, Minn, 1980-1983. <i>Archives of Dermatology</i> . 1991;127(8):1184-7.                                                                                                                                                                                                                                                |
| USA             | Shbeeb et al. (1995)    | 1982-1991        | Incidence              | Low    | Shbeeb MI, Sunku J, Hunder GG, Gibson LE, Ofallon WM, Gabriel SE. Incidence of psoriasis(p) and psoriatic arthritis(pa), a population-based study. <i>Arthritis and Rheumatism</i> . 1995;38(9):1353.                                                                                                                                                                                                                    |

|     |                         |           |           |     |                                                                                                                                                                                                                                              |
|-----|-------------------------|-----------|-----------|-----|----------------------------------------------------------------------------------------------------------------------------------------------------------------------------------------------------------------------------------------------|
| USA | Icen et al. (2009)      | 1970-2000 | Incidence | Low | Icen M, Crowson CS, McEvoy MT, Dann FJ, Gabriel SE, MaraditKremers H. Trends in incidence of adult-onset psoriasis over three decades: a population-based study. <i>Journal of the American Academy of Dermatology</i> . 2009;60(3):394-401. |
| USA | Tollefson et al. (2010) | 1970-1999 | Incidence | Low | Tollefson MM, Crowson CS, McEvoy MT, Kremers HM. Incidence of psoriasis in children: A population-based study. <i>Journal of the American Academy of Dermatology</i> . 2010;62(6):979-87.                                                    |

---

**eTable 2 Characteristics of studies reporting on prevalence of psoriasis.**

| Country   | Study                       | Study time | Study outcome | Risk of Bias | Inclusion in the analysis | Reference                                                                                                                                                                                                                                                         |
|-----------|-----------------------------|------------|---------------|--------------|---------------------------|-------------------------------------------------------------------------------------------------------------------------------------------------------------------------------------------------------------------------------------------------------------------|
| Australia | Quirk et al., (1979)        | NR         | Prevalence    | High         | Yes                       | Quirk CJ. Skin disease in the Busselton population survey. <i>Med J Aust.</i> 1979 Jun 16;1(12):569-70.                                                                                                                                                           |
| Australia | Kilkenny et al., (1998)     | 1996       | Prevalence    | Medium       | Yes                       | Kilkenny M, Stathakis V, Jolley D, Marks R. Maryborough skin health survey: prevalence and sources of advice for skin conditions. <i>Australasian Journal of Dermatology.</i> 1998;39(4):233-7.                                                                   |
| Australia | Plunkett et al., (1999)     | 1997-1998  | Prevalence    | Low          | Yes                       | Plunkett A, Merlin K, Gill D, Zuo YQ, Jolley D, Marks R. The frequency of common nonmalignant skin conditions in adults in central Victoria, Australia. <i>International Journal of Dermatology.</i> 1999;38(12):901-8.                                           |
| Brazil    | Bechelli et al. (1981)      | 1974-1975  | Prevalence    | Medium       | No                        | Bechelli LM, Haddad N, Pimenta WP, Pagnano PM, Melchior E Jr, Fregnan RC, Zanin LC, Arenas A. Epidemiological survey of skin diseases in schoolchildren living in the Purus Valley (Acre State, Amazonia, Brazil). <i>Dermatologica.</i> 1981;163(1):78-93.       |
| Brazil    | Fujii et al. (2012)         | 2011       | Prevalence    | High         | No                        | Fujii RK, Mould JF, Tang B, Brandt H, Pomerantz D, Chapnick J, et al. Burden of disease in patients with diagnosed psoriasis in Brazil: Results from 2011 National Health and Wellness Survey (NHWS). <i>Value in Health.</i> 2012;15 (4):A107.                   |
| Brazil    | Ferreira et al. (2014)      | 2012       | Prevalence    | High         | No                        | Ferreira CN, DiBonaventura MD, Tang B, Rufino CS, Manfrin DF. Economic burden of psoriatic patients in the Brazilian health system. <i>Value in Health.</i> 2014;17 (3):A226.                                                                                     |
| Brazil    | Romiti et al. (2017)        | 2015-2016  | Prevalence    | Medium       | Yes                       | Romiti R, Amone M, Menter A, Miot HA. Prevalence of psoriasis in Brazil - a geographical survey. <i>International Journal of Dermatology.</i> 2017;56(8):e167-e8.                                                                                                 |
| Brazil    | DiBonaventura et al. (2018) | 2012       | Prevalence    | Medium       | Yes                       | DiBonaventura M, Carvalho AVE, Souza CDS, Squiassi HB, Ferreira CN. The association between psoriasis and health-related quality of life, work productivity, and healthcare resource use in Brazil. <i>Anais brasileiros de dermatologia.</i> 2018;93(2):197-204. |

|        |                                      |           |                        |        |     |                                                                                                                                                                                                                                                                                                                                                                                                                                                        |
|--------|--------------------------------------|-----------|------------------------|--------|-----|--------------------------------------------------------------------------------------------------------------------------------------------------------------------------------------------------------------------------------------------------------------------------------------------------------------------------------------------------------------------------------------------------------------------------------------------------------|
| Canada | Solomon et al. (2010)                | 1996-2006 | Prevalence             | Low    | Yes | Solomon DH, Love TJ, Canning C, Schneeweiss S. Risk of diabetes among patients with rheumatoid arthritis, psoriatic arthritis and psoriasis. <i>Annals of the Rheumatic Diseases</i> . 2010;69(12):2114-7.                                                                                                                                                                                                                                             |
| Canada | Gregory et al. (2014)                | 2008-2012 | Prevalence             | Medium | No  | Gregory V, Luciani L, Barbeau M, Petrella RJ. Comorbidities and health resource use of chronic plaque psoriasis patients in Canada : A matched-cohort study. <i>Value in Health</i> . 2014;17 (3):A125.                                                                                                                                                                                                                                                |
| Canada | Petrella et al. (2014)               | 2008-2012 | Prevalence             | Medium | Yes | Petrella RJ, Gregory V, Luciani L, Barbeau M. Characteristics of chronic plaque psoriasis in Canada: A retrospective database study. <i>Value in Health</i> . 2014;17 (3):A284.                                                                                                                                                                                                                                                                        |
| Canada | Eder et al. (2017)                   | NR        | Prevalence             | Medium | No  | Eder L, Widdifield J, Rosen CF, Gladman DD, Alhusayen R, Paterson M, et al. Accuracy of Canadian administrative health data in identifying patients with psoriasis and psoriatic arthritis using primary care medical records as the reference standard. <i>Arthritis and Rheumatology Conference: American College of Rheumatology/Association of Rheumatology Health Professionals Annual Scientific Meeting, ACR/ARHP</i> . 2017;69(Supplement 10). |
| Canada | Eder et al. (2017)                   | 2000-2015 | Prevalence & Incidence | Medium | No  | Eder L, Widdifield J, Rosen CF, Gladman DD, Alhusayen R, Paterson M, et al. Increasing population burden of psoriatic disease in Ontario, Canada-a longitudinal cohort study. <i>Arthritis and Rheumatology Conference: American College of Rheumatology/Association of Rheumatology Health Professionals Annual Scientific Meeting, ACR/ARHP</i> . 2017;69(Supplement 10).                                                                            |
| Canada | Eder et al. (2019)                   | 2000-2015 | Prevalence & Incidence | Low    | Yes | Eder L, Widdifield J, Rosen CF, Cook R, Lee KA, Alhusayen R, et al. Trends in the Prevalence and Incidence of Psoriasis and Psoriatic Arthritis in Ontario, Canada: A Population-Based Study. <i>Arthritis Care and Research</i> . 2019;71(8):1084-91.                                                                                                                                                                                                 |
| China  | Henan Dermatoses Survey Group (1982) | 1980      | Prevalence             | Medium | No  | Henan Dermatoses Survey Group. An analysis of 487 cases of psoriasis in 100,000 natural population of Henan rural district. <i>Chinese Journal of Dermatology</i> . 1982;15:83-4.                                                                                                                                                                                                                                                                      |
| China  | Li et al. (1982)                     | 1974-1981 | Prevalence             | High   | Yes | Li H-J. Psoriasis in China. <i>Chinese Medical Journal</i> . 1982;95(4):245-56.                                                                                                                                                                                                                                                                                                                                                                        |



|         |                              |           |            |        |     |                                                                                                                                                                                                                       |
|---------|------------------------------|-----------|------------|--------|-----|-----------------------------------------------------------------------------------------------------------------------------------------------------------------------------------------------------------------------|
| China   | Yip et al. (1984)            | 1974-1981 | Prevalence | High   | No  | Yip SY. The prevalence of psoriasis in the Mongoloid race. <i>Journal of the American Academy of Dermatology</i> . 1984;10(6):965-8.                                                                                  |
| China   | Changgeng et al. (1987)      | 1984      | Prevalence | Low    | Yes | Changgeng S, Guowei Z, Guangchao W. Distribution of psoriasis in China: A nationwide screening. <i>Proceedings of the Chinese Academy of Medical Sciences and the Peking Union Medical College</i> . 1987;2(2):59-65. |
| China   | Zhanli et al. (1994)         | 1984      | Prevalence | Medium | Yes | Zhanli T, Yongnian P, Changgeng S. A correlation-study of incidence of psoriasis and meteorological factors. <i>Chinese Journal of Dermatology</i> . 1998;31(2):75-8.                                                 |
| China   | Ding et al. (2012)           | NR        | Prevalence | Low    | Yes | Ding XL, Wang TL, Shen YW, Wang XY, Zhou C, Tian S, et al. Prevalence of psoriasis in China: A population-based study in six cities. <i>European Journal of Dermatology</i> . 2012;22(5):663-7.                       |
| China   | Li et al. (2012)             | NR        | Prevalence | Low    | Yes | Li R, Sun J, Ren LM, Liu WH, Zhang XW, Chen S, et al. Epidemiology of eight common rheumatic diseases in China: A large-scale cross-sectional survey in Beijing. <i>Rheumatology</i> . 2012;51(4):721-9.              |
| China   | Wang et al. (2012)           | 2008-2009 | Prevalence | Low    | Yes | Wang R-L, Cao L-S, Zhou C, Zhang J-Z. Prevalence of 15 skin diseases in adolescents from Liangshan prefecture in Sichuan Province. <i>Chin J Dermatol</i> . 2012;45(4):270-2.                                         |
| China   | Li et al. (2013)             | 2008-2010 | Prevalence | Low    | Yes | Li M-J, Wang P, Cai M, Liu Q, Wu W-W, Fu L, et al. Prevalence and risk factors of psoriasis in Hainan province: an epidemiological survey. <i>Chin J Dermatol</i> . 2013;46(3):157-9.                                 |
| Croatia | Barisic-Drusko et al. (1989) | 1987      | Prevalence | High   | Yes | Barisic-Drusko V, Paljan D, Kansky A, Vujasinovic S. Prevalence of psoriasis in Croatia. <i>ActaDermato-VenereologicaSupplementum</i> . 1989;146:178-9.                                                               |
| Denmark | Lomholt et al. (1964)        | 1948      | Prevalence | Medium | Yes | Lomholt G. Prevalence of skin diseases in a population; a census study from the Faroe Islands. <i>Danish Medical Bulletin</i> . 1964;11:1-7.                                                                          |
| Denmark | Brandrup et al. (1981)       | 1978      | Prevalence | Low    | Yes | Brandrup F, Green A. The prevalence of psoriasis in Denmark. <i>ActaDermato-Venereologica</i> . 1981;61(4):344-6.                                                                                                     |

|         |                           |           |                        |        |     |                                                                                                                                                                                                                                                                           |
|---------|---------------------------|-----------|------------------------|--------|-----|---------------------------------------------------------------------------------------------------------------------------------------------------------------------------------------------------------------------------------------------------------------------------|
| Denmark | Jensen et al. (2013)      | 2006-2008 | Prevalence             | Medium | Yes | Jensen P, Thyssen JP, Zachariae C, Hansen PR, Linneberg A, Skov L. Cardiovascular risk factors in subjects with psoriasis: a cross-sectional general population study. <i>International Journal of Dermatology</i> . 2013;52(6):681-3.                                    |
| Denmark | Mortz et al. (2014)       | 2010      | Prevalence             | High   | Yes | Mortz CG, Bindslev-Jensen C, Andersen KE. Hand eczema in the Odense Adolescence Cohort Study on Atopic Diseases and Dermatitis (TOACS): Prevalence, incidence and risk factors from adolescence to adulthood. <i>British Journal of Dermatology</i> . 2014;171(2):313-23. |
| Denmark | Egeberg et al. (2017)     | 2003-2012 | Prevalence & Incidence | Low    | Yes | Egeberg A, Skov L, Gislason GH, Thyssen JP, Mallbris L. Incidence and prevalence of psoriasis in Denmark. <i>Acta Dermato-Venereologica</i> . 2017;97(7):808-12.                                                                                                          |
| Denmark | Blegvad et al. (2017)     | 2012      | Prevalence             | Low    | Yes | Blegvad C, Egeberg A, Tind Nielsen TE, Gislason GH, Zachariae C, Nybo Andersen AM, et al. Autoimmune disease in children and adolescents with psoriasis: A cross-sectional study in Denmark. <i>Acta Dermato-Venereologica</i> . 2017;97(10):1225-9.                      |
| Denmark | Egeberg et al. (2019)     | 2018      | Prevalence             | Low    | Yes | Egeberg A, Andersen YMF, Thyssen JP. Prevalence and characteristics of psoriasis in Denmark: Findings from the Danish skin cohort. <i>BMJ Open</i> . 2019;9 (3) (no pagination)(e028116).                                                                                 |
| Egypt   | Abdel-Hafez et al. (2003) | 1994-1996 | Prevalence             | Low    | Yes | Abdel-Hafez K, Abdel-Aty MA, Hofny ERM. Prevalence of skin diseases in rural areas of Assiut Governorate, Upper Egypt. <i>International Journal of Dermatology</i> . 2003;42(11):887-92.                                                                                  |
| Egypt   | Yamamah et al. (2012)     | 2008-2009 | Prevalence             | High   | Yes | Yamamah GA, Emam HM, Abdelhamid MF, Elsaie ML, Shehata H, Farid T, et al. Epidemiologic study of dermatologic disorders among children in South Sinai, Egypt. <i>International Journal of Dermatology</i> . 2012;51(10):1180-5.                                           |
| Egypt   | El-Khateeb et al. (2014)  | 2011-2012 | Prevalence             | Low    | Yes | El-Khateeb EA, Lotfi RA, Abdel-Aziz KM, El-Shiekh SE. Prevalences of skin diseases among primary schoolchildren in Damietta, Egypt. <i>International Journal of Dermatology</i> . 2014;53(5):609-16.                                                                      |
| Egypt   | Nada et al. (2014)        | 2009-2010 | Prevalence             | High   | Yes | Nada EE, Moustafa M, Elfetoh NA, El Said S. Pattern of scalp affection in primary school children in Sohag, Upper Egypt. <i>Journal of the American Academy of Dermatology</i> . 2014;(1):AB83.                                                                           |

|         |                           |      |            |      |     |                                                                                                                                                                                                                                                                                                                            |
|---------|---------------------------|------|------------|------|-----|----------------------------------------------------------------------------------------------------------------------------------------------------------------------------------------------------------------------------------------------------------------------------------------------------------------------------|
| France  | Wolkenstein et al. (2003) | 2002 | Prevalence | Low  | Yes | Wolkenstein P, Grob JJ, Bastuji-Garin S, Ruzsyczynski S, Roujeau JC, Revuz J, et al. French People and Skin Diseases: Results of a Survey Using a Representative Sample. <i>Archives of Dermatology</i> . 2003;139(12):1614-9.                                                                                             |
| France  | Wolkenstein et al. (2009) | 2005 | Prevalence | Low  | Yes | Wolkenstein P, Revuz J, Roujeau JC, Bonnelye G, Grob JJ, Bastuji-Garin S, et al. Psoriasis in France and associated risk factors: results of a case-control study based on a large community survey. <i>Dermatology</i> . 2009;218(2):103-9.                                                                               |
| France  | Richard et al. (2018)     | 2016 | Prevalence | Low  | Yes | Richard MA, Corgibet F, Beylot-Barry M, Barbaud A, Bodemer C, Chaussade V, et al. Sex- and age-adjusted prevalence estimates of five chronic inflammatory skin diseases in France: results of the << OBJECTIFS PEAU >> study. <i>Journal of the European Academy of Dermatology and Venereology</i> . 2018;32(11):1967-71. |
| Germany | Schlander et al. (2008)   | 2003 | Prevalence | High | Yes | Schlander M, Schwarz O, Viapiano M, Bonauer N. Administrative prevalence of psoriasis in Germany. <i>Value in Health</i> . 2008;11(6):A615-A6.                                                                                                                                                                             |
| Germany | Schafer et al. (2009)     | 2005 | Prevalence | High | No  | Schafer I, Radtke MA, Glaeske G, Augustin M. Epidemiology of psoriasis in Germany: evaluation of routine data of a legal medical insurance. <i>Journal Der Deutschen Dermatologischen Gesellschaft</i> . 2009;7:194.                                                                                                       |
| Germany | Augustin et al. (2010)    | 2005 | Prevalence | Low  | No  | Augustin M, Glaeske G, Radtke MA, Christophers E, Reich K, Schafer I. Epidemiology and comorbidity of psoriasis in children. <i>British Journal of Dermatology</i> . 2010;162(3):633-6.                                                                                                                                    |
| Germany | Augustin et al. (2010)    | 2005 | Prevalence | Low  | No  | Augustin M, Reich K, Glaeske G, Schaefer I, Radtke M. Co-morbidity and age-related prevalence of psoriasis: Analysis of health insurance data in Germany. <i>Acta Dermato-Venereologica</i> . 2010;90(2):147-51.                                                                                                           |
| Germany | Schmitt et al. (2010)     | NR   | Prevalence | High | Yes | Schmitt J, Apfelbacher CJ. Epidemiology of pediatric psoriasis: A representative German cross-sectional study. <i>Experimental Dermatology</i> . 2010;19(2):219.                                                                                                                                                           |

|         |                           |           |            |        |     |                                                                                                                                                                                                                                                                                                                                                    |
|---------|---------------------------|-----------|------------|--------|-----|----------------------------------------------------------------------------------------------------------------------------------------------------------------------------------------------------------------------------------------------------------------------------------------------------------------------------------------------------|
| Germany | Schmitt et al. (2010)     | 2003-2004 | Prevalence | Medium | No  | Schmitt J, Ford DE. Psoriasis is independently associated with psychiatric morbidity and adverse cardiovascular risk factors, but not with cardiovascular events in a population-based sample. <i>Journal of the European Academy of Dermatology &amp; Venereology</i> . 2010;24(8):885-92.                                                        |
| Germany | Augustin et al. (2011)    | 2007      | Prevalence | Low    | Yes | Augustin M, Chapnik J, Gupta S, Buesch K, Radtke M. Psoriasis causes high costs, reduces productivity at work and quality of life. [German] Psoriasis verursachthoheKosten, mindert die Produktivitat am Arbeitsplatz und verringert die Lebensqualität. <i>AktuelleDermatologie</i> . 2011;37(10):353-9.                                          |
| Germany | Augustin et al. (2011)    | 2007      | Prevalence | Low    | No  | Augustin M, Schafer I, Reich K, Glaeske G, Radtke M. Systemic treatment with corticosteroids in psoriasis-health care provision far beyond the S3-guidelines. [German, English] SystemischeGlukokortikosteroidebei Psoriasis - Versorgungjenseits der S3-Leitlinie. <i>JDDG - Journal of the German Society of Dermatology</i> . 2011;9(10):833-8. |
| Germany | Schafer et al. (2011)     | 2005      | Prevalence | Low    | No  | Schafer I, Rustenbach SJ, Radtke M, Augustin J, Glaeske G, Augustin M. Epidemiology of psoriasis in Germany-analysis of secondary health insurance data. <i>Gesundheitswesen</i> . 2011;73(5):308-13.                                                                                                                                              |
| Germany | Kampfe et al. (2012)      | 2009      | Prevalence | High   | No  | Kampfe SM, Augustin M, Schafer I, Glaeske G, Schicktanz C, Radtke M. Prevalence and health care situation of juvenile psoriasis in Germany. <i>Experimental Dermatology</i> . 2012;21 (3):e21.                                                                                                                                                     |
| Germany | Augustin et al. (2013)    | 2009      | Prevalence | Low    | No  | Augustin M, Reich K, Glaeske G, Kampfe S, Radtke MA, Gerdau-Heitmann C, et al. Drug supply for children with psoriasis in Germany. <i>Journal der DeutschenDermatologischenGesellschaft</i> . 2013;11(8):751-5.                                                                                                                                    |
| Germany | Matusiewicz et al. (2014) | 2007      | Prevalence | Low    | No  | Matusiewicz D, Koerber A, Schadendorf D, Wasem J, Neumann A. Childhood psoriasis - An analysis of German health insurance data. <i>Pediatric Dermatology</i> . 2014;31(1):8-13.                                                                                                                                                                    |

|         |                        |           |                        |      |     |                                                                                                                                                                                                                                                                                          |
|---------|------------------------|-----------|------------------------|------|-----|------------------------------------------------------------------------------------------------------------------------------------------------------------------------------------------------------------------------------------------------------------------------------------------|
| Germany | Radtke et al. (2014)   | NR        | Prevalence             | High | No  | Radtke MA, Schafer I, Glaeske G, Jacobi A, Augustin M. Prevalence and comorbidities in adults with psoriasis compared with atopic dermatitis: Analysis of health insurance data in Germany. <i>British Journal of Dermatology</i> . 2014;171 (6):e117-e8.                                |
| Germany | Augustin et al. (2015) | 2009      | Prevalence             | Low  | No  | Augustin M, Radtke MA, Glaeske G, Reich K, Christophers E, Schaefer I, et al. Epidemiology and comorbidity in children with psoriasis and atopic eczema. <i>Dermatology</i> . 2015;231(1):35-40.                                                                                         |
| Germany | Jacobi et al. (2015)   | 2009      | Prevalence             | Low  | No  | Jacobi A, Kis A, Radtke MA, Augustin J, Glaeske G, Schaefer I, et al. Regional Differences of Health Care for Juvenile Psoriasis in Germany. [German]Regionale Unterschiede in der Versorgung der juvenilen Psoriasis in Deutschland. <i>Aktuelle Dermatologie</i> . 2015;41(8-9):333-9. |
| Germany | Radtke et al. (2015)   | NR        | Prevalence             | High | No  | Radtke MA, Schafer I, Jacobi A, Glaeske G, Kampfe S, Augustin M. Prevalence and Comorbidity of Atopic Dermatitis in Comparison to Psoriasis-Analysis of country wide Health insurance scheme data. <i>Journal Der Deutschen Dermatologischen Gesellschaft</i> . 2015;13:124.             |
| Germany | Matterne et al. (2016) | 2003-2006 | Prevalence             | Low  | No  | Matterne U, Apfelbacher C. Peer-relationship-problems account for quality of life impairments in pediatric psoriasis. <i>Journal of Psychosomatic Research</i> . 2016;84:31-6.                                                                                                           |
| Germany | Jacob et al. (2016)    | 2007-2010 | Prevalence & Incidence | High | No  | Jacob C, Meier F, Neidhardt K, Jugl SM, Walker J, Braun S, et al. Epidemiology and costs of psoriasis in Germany-a retrospective claims data analysis. <i>Value in Health</i> . 2016;19(7):A566.                                                                                         |
| Germany | Radtke et al. (2017)   | 2009      | Prevalence             | Low  | Yes | Radtke MA, Schafer I, Glaeske G, Jacobi A, Augustin M. Prevalence and comorbidities in adults with psoriasis compared to atopic eczema. <i>Journal of the European Academy of Dermatology &amp; Venereology</i> . 2017;31(1):151-7.                                                      |
| Germany | Drewitz et al. (2018)  | NR        | Prevalence             | High | No  | Drewitz KP, Stark K, Zimmermann ME, Heid I, Apfelbacher CJ. Prevalence and determinants of Psoriasis in a cross-sectional study of the elderly-results from the German AugUR study. <i>Experimental Dermatology</i> . 2018;27 (3):e43-e4.                                                |

|         |                         |           |                        |        |     |                                                                                                                                                                                                                                                        |
|---------|-------------------------|-----------|------------------------|--------|-----|--------------------------------------------------------------------------------------------------------------------------------------------------------------------------------------------------------------------------------------------------------|
| Germany | Biermann et al. (2019)  | 2017      | Prevalence             | High   | Yes | Biermann MH, Melzer N. Prevalence and biological treatment of psoriasis in children and adolescents in Germany. <i>Journal of Investigative Dermatology</i> . 2019;139(9):S239.                                                                        |
| Germany | Petersen et al. (2019)  | 2010      | Prevalence             | High   | Yes | Petersen J, Filali-Bouami S, Hagenstrom K, Augustin M. Prevalence and Incidence of Psoriasis - an up-to-date Routine Data Analysis. <i>Journal Der Deutschen Dermatologischen Gesellschaft</i> . 2019;17:204                                           |
| Germany | Sewerin et al. (2019)   | 2009-2012 | Prevalence & Incidence | Medium | Yes | Sewerin P, Brinks R, Schneider M, Haase I, Vordenbaumen S. Prevalence and incidence of psoriasis and psoriatic arthritis. <i>Annals of the Rheumatic Diseases</i> . 2019;78(2):286-7.                                                                  |
| India   | Dogra et al. (2003)     | 2001      | Prevalence             | Medium | Yes | Dogra S, Kumar B. Epidemiology of skin diseases in school children: a study from northern India. <i>PediatrDermatol</i> . 2003;(6):470-3.                                                                                                              |
| India   | Grills et al. (2012)    | 2010      | Prevalence             | Low    | Yes | Grills N, Grills C, Spelman T, Stoove M, Hellard M, El-Hayek C, et al. Prevalence survey of dermatological conditions in mountainous north India. <i>International Journal of Dermatology</i> . 2012;51(5):579-87.                                     |
| Iraq    | Al-Rubiay et al. (2005) | NR        | Prevalence             | Medium | Yes | Al-Rubiay KK, Al-Rubaiy LK. Dermatoepidemiology: A household survey among two urban areas In Basrah City, Iraq. <i>Internet J Dermatol</i> . 2006; 4(2): 10.                                                                                           |
| Iraq    | Ali et al. (2011)       | 2010      | Prevalence             | Medium | Yes | Ali KBM. Prevalence of skin diseases in rural Erbil: A community-based study. <i>Zanco J. Med. Sci</i> . 2012; 16 (1): 45-51.                                                                                                                          |
| Israel  | Shapiro et al. (2007)   | 1997-2004 | Prevalence             | Low    | No  | Shapiro J, Cohen AD, David M, Hodak E, Chodik G, Viner A, et al. The association between psoriasis, diabetes mellitus, and atherosclerosis in Israel: a case-control study. <i>Journal of the American Academy of Dermatology</i> . 2007;56(4):629-34. |
| Israel  | Shalom et al. (2018)    | NR        | Prevalence & Incidence | Low    | Yes | Shalom G, Zisman D, Babaev M, Horev A, Tiosano S, Schonmann Y, et al. Psoriasis in Israel: demographic, epidemiology, and healthcare services utilization. <i>International Journal of Dermatology</i> . 2018;57(9):1068-74.                           |

|        |                          |           |                        |        |     |                                                                                                                                                                                                                                                                                                                 |
|--------|--------------------------|-----------|------------------------|--------|-----|-----------------------------------------------------------------------------------------------------------------------------------------------------------------------------------------------------------------------------------------------------------------------------------------------------------------|
| Israel | Schonmann et al. (2019)  | NR        | Prevalence & Incidence | Low    | Yes | Schonmann Y, Ashcroft DM, Iskandar IYK, Parisi R, Sde-Or S, Comaneshter D, et al. Incidence and prevalence of psoriasis in Israel between 2011 and 2017. <i>Journal of the European Academy of Dermatology and Venereology</i> .                                                                                |
| Italy  | Naldi et al. (2004)      | 2003      | Prevalence             | Low    | No  | Naldi L, Colombo P, Placchesi EB, Piccitto R, Chatenoud L, La Vecchia C, et al. Study design and preliminary results from the pilot phase of the PraKtis study: Self-reported diagnoses of selected skin diseases in a representative sample of the Italian population. <i>Dermatology</i> . 2004;208(1):38-42. |
| Italy  | Saraceno et al. (2008)   | 2006      | Prevalence             | Medium | Yes | Saraceno R, Mannheimer R, Chimenti S. Regional distribution of psoriasis in Italy. <i>Journal of the European Academy of Dermatology &amp; Venereology</i> . 2008;22(3):324-9.                                                                                                                                  |
| Italy  | Naldi et al. (2009)      | 1997      | Prevalence             | Low    | Yes | Naldi L, Parazzini F, Gallus S, Leardini M, Feliciangeli M, Assalve D, et al. Prevalence of atopic dermatitis in Italian schoolchildren: Factors affecting its variation. <i>Acta Dermato-Venereologica</i> . 2009;89(2):122-5.                                                                                 |
| Italy  | Sardu et al. (2012)      | 2009      | Prevalence             | Low    | Yes | Sardu C, Cocco E, Mereu A, Massa R, Cuccu A, Marrosu MG, et al. Population based study of 12 autoimmune diseases in Sardinia, Italy: prevalence and comorbidity. <i>PLoS ONE [Electronic Resource]</i> . 2012;7(3):e32487.                                                                                      |
| Italy  | Cantarutti et al. (2015) | 2006-2012 | Prevalence & Incidence | Low    | Yes | Cantarutti A, Dona D, Visentin F, Borgia E, Scamarcia A, Cantarutti L, et al. Epidemiology of frequently occurring skin diseases in Italian children from 2006 to 2012: A retrospective, population-based study. <i>Pediatric Dermatology</i> . 2015;32(5):668-78.                                              |
| Italy  | Pezzolo et al. (2019)    | 2003-2004 | Prevalence & Incidence | Low    | Yes | Pezzolo E, Cazzaniga S, Colombo P et al. Psoriasis incidence and lifetime prevalence: Suggestion for a higher mortality rate in older age-classes among psoriatic patients compared to the general population in Italy. <i>Acta Dermato-Venereologica</i> 2019; 99 (4): 400-3.                                  |
| Japan  | Kubota et al. (2015)     | 2010-2011 | Prevalence             | Low    | Yes | Kubota K, Kamijima Y, Sato T, Ooba N, Koide D, Iizuka H, et al. Epidemiology of psoriasis and palmoplantar pustulosis: a nationwide study using the Japanese national claims database. <i>BMJ Open</i> . 2015;5(1):e006450.                                                                                     |

|        |                            |           |            |        |     |                                                                                                                                                                                                                                                    |
|--------|----------------------------|-----------|------------|--------|-----|----------------------------------------------------------------------------------------------------------------------------------------------------------------------------------------------------------------------------------------------------|
| KSA    | Abolfotouh et al. (1996)   | NR        | Prevalence | Medium | No  | Abolfotouh MA, Abu-Zeid HA, Bahamdan K, Abdel Aziz M, Bassuni WA, Eid O. Skin disorders among male schoolchildren in the Asir region, southwestern Saudi Arabia. <i>Ann Saudi Med.</i> 1996 May;16(3):342-5.                                       |
| KSA    | Al-Saeed et al. (2006)     | 2003      | Prevalence | Medium | No  | Al-Saeed WY <sup>1</sup> , Al-Dawood KM, Bukhari IA, Bahnassy AA. Prevalence and pattern of skin disorders among female schoolchildren in Eastern Saudi Arabia. <i>Saudi Med J.</i> 2006 Feb;27(2):227-34.                                         |
| KSA    | Amin et al. (2011)         | NR        | Prevalence | Medium | No  | Amin TT, Ali A, Kaliyadan F. Skin disorders among male primary school children in Al Hassa, Saudi Arabia: prevalence and socio-demographic correlates--a comparison of urban and rural populations. <i>Rural Remote Health.</i> 2011;11(1):1517.   |
| KSA    | Rahamathulla et al. (2019) | 2016      | Prevalence | Low    | Yes | Rahamathulla MP. Prevalence of skin disorders and associated socio-economic factors among primary school children in the Eastern region of Saudi Arabia. <i>Jpma.</i> 2019; <i>The Journal of the Pakistan Medical Association.</i> 69(8):1175-80. |
| Nepal  | Walker et al. (2008)       | NR        | Prevalence | High   | Yes | Walker SL, Shah M, Hubbard VG, Pradhan HM, Ghimire M. Skin disease is common in rural Nepal: results of a point prevalence study. <i>Br J Dermatol.</i> 2008; 158(2):334-8                                                                         |
| Norway | Kavli et al. (1985)        | 1979-1980 | Prevalence |        | No  | Kavli G, Forde OH, Arnesen E, Stenvold SE. Psoriasis: familial predisposition and environmental factors. <i>British Medical Journal Clinical Research Ed.</i> 1985;291(6501):999-1000.                                                             |
| Norway | Braathen et al. (1989)     | 1985      | Prevalence | Low    | Yes | Braathen LR, Botten G, Bjerkedal T. Prevalence of psoriasis in Norway. <i>ActaDermato-VenereologicaSupplementum.</i> 1989;142:5-8.                                                                                                                 |
| Norway | Falk et al. (1993)         | 1991      | Prevalence | Medium | Yes | Falk ES, Vandbakk O. Prevalence of psoriasis in a Norwegian Lapp population. <i>ActaDermato-VenereologicaSupplementum.</i> 1993;182:6-9.                                                                                                           |
| Norway | Bo et al. (2008)           | 2000-2001 | Prevalence | Medium | Yes | Bo K, Thoresen M, Dalgard F. Smokers report more psoriasis, but not atopic dermatitis or hand eczema: results from a Norwegian population survey among adults. <i>Dermatology.</i> 2008;216(1):40-5.                                               |
| Norway | Danielsen et al. (2013)    | 1979-2008 | Prevalence | Medium | Yes | Danielsen K, Olsen AO, Wilsgaard T, Furberg AS. Is the prevalence of psoriasis increasing? A 30-year follow-up of a population-based cohort. <i>British Journal of Dermatology.</i> 2013;168(6):1303-10.                                           |



|                   |                        |           |            |        |     |                                                                                                                                                                                                                                                                              |
|-------------------|------------------------|-----------|------------|--------|-----|------------------------------------------------------------------------------------------------------------------------------------------------------------------------------------------------------------------------------------------------------------------------------|
| Norway            | Hoff et al. (2015)     | 2006-2008 | Prevalence | Medium | No  | Hoff M, Gulati AM, Romundstad PR, Kavanaugh A, Haugeberg G. Prevalence and incidence rates of psoriatic arthritis in central Norway: data from the Nord-Trondelag health study (HUNT). <i>Annals of the Rheumatic Diseases</i> . 2015;74(1):60-4.                            |
| Norway            | Modalsli et al. (2016) | 2006-2008 | Prevalence | Low    | Yes | Modalsli EH, Snekvik I, Asvold BO, Romundstad PR, Naldi L, Saunes M. Validity of Self-Reported Psoriasis in a General Population: The HUNT Study, Norway. <i>Journal of Investigative Dermatology</i> . 2016;136(1):323-5.                                                   |
| Norway            | Hegvik et al. (2017)   | 2015      | Prevalence | High   | Yes | Hegvik TA, Instanes JT, Haavik J, Klungsoyr K, Engeland A. Associations between attention-deficit/hyperactivity disorder and autoimmune diseases are modified by sex: a population-based cross-sectional study. <i>European Child and Adolescent Psychiatry</i> . 2017:1-13. |
| Poland            | Borzecki et al. (2012) | 2005-2009 | Prevalence | High   | No  | Borzecki A, Dudra-Jastrzebska M, Sajdak-Wojtaluk A. Epidemiology of psoriasis in District of Lublin in 2005-2009 period. [Polish] Epidemiologia i choroby skóry w rejonie Województwa Lubelskiego w latach 2005-2009. <i>Dermatologia i Kliniczna</i> . 2012;14(4):149-53.   |
| Poland            | Borzecki et al. (2018) | 2008-2015 | Prevalence | Medium | Yes | Borzecki A, Koncewicz A, raszewska-Famielec M, Dudra-Jastrzebska M. Epidemiology of psoriasis in the years 2008-2015 in Poland. <i>Przegląd Dermatologiczny</i> . 2018;105(6):693-700.                                                                                       |
| Portugal          | Videira et al. (2017)  | 2015      | Prevalence | Medium | Yes | Videira IFS, Marques AR, Neves ÂCP, Monteiro DFPdP. Psoríase e fatores de risco cardiovascular: estudo observacional numa população urbana da Região Norte de Portugal. <i>Revista Portuguesa de Medicina Geral e Familiar</i> . 2017;33(6):386-92.                          |
| Republic of Korea | Lee et al. (2017)      | 2011-2015 | Prevalence | Low    | No  | Lee JY, Kang S, Park JS, Jo SJ. Prevalence of Psoriasis in Korea: A Population-Based Epidemiological Study Using the Korean National Health Insurance Database. <i>Ann Dermatol</i> . 2017 Dec;29(6):761-767.                                                                |
| Republic of Korea | Oh et al. (2017)       | 2002-2010 | Prevalence |        | Yes | Oh EH, Ro YS, Kim JE. Epidemiology and cardiovascular comorbidities in patients with psoriasis: A Korean nationwide population-based cohort study. <i>Journal of Dermatology</i> . 2017;44(6):621-9.                                                                         |

|                   |                           |           |                        |        |     |                                                                                                                                                                                                                                                               |
|-------------------|---------------------------|-----------|------------------------|--------|-----|---------------------------------------------------------------------------------------------------------------------------------------------------------------------------------------------------------------------------------------------------------------|
| Republic of Korea | Han et al. (2018)         | 2006-2015 | Prevalence             | Low    | Yes | Han JH, Lee JH, Han KD, Seo HM, Bang CH, Park YM, et al. Epidemiology and medication trends in patients with psoriasis: A nationwide population-based cohort study from Korea. <i>Acta Dermato-Venereologica</i> . 2018;98(4):396-400.                        |
| Romania           | Popescu et al. (1999)     | 1995      | Prevalence             | Low    | Yes | Popescu R, Popescu CM, Williams HC, Forsea D. The prevalence of skin conditions in Romanian school children. <i>Br J Dermatol</i> . 1999; 140 (5):891-6                                                                                                       |
| Romania           | Boca et al. (2019)        | NR        | Prevalence             | Low    | Yes | Boca AN, Ilies RF, Vesa S, Pop R, Tataru AD, Buzoianu AD. The first nation-wide study revealing epidemiologic data and life quality aspects of psoriasis in Romania. <i>Experimental and Therapeutic Medicine</i> . 2019;18(2):900-4.                         |
| Russia            | Osmanova et al. (1985)    | 1958-1978 | Prevalence             | High   | Yes | Osmanova FM. Assessment of the incidence of psoriasis based on data from office visits and medical examinations. [Russian] Otsenkachastoty psoriazapodannym obrashchaemosti imeditsinskikh smotrov. <i>Vestnik Dermatologii i Venerologii</i> . 1985(1):46-8. |
| Russia            | Znamenskaya et al. (2012) | 2009-2011 | Prevalence & Incidence | Low    | No  | Znamenskaya LF, Melekhina LY, Bogdanova YV, Mineyeva AA. Psoriasis incidence and prevalence in the Russian Federation. <i>Vestnik dermatologii i venerologii</i> . 2012(5):20-9.                                                                              |
| Russia            | Kubanov et al. (2017)     | 2010-2016 | Prevalence & Incidence | Low    | Yes | Kubanov AA, Kubanov AA, Melekhina LE, Bogdanova EV. The Assessment of the Incidence of Skin Disorders in Russian Federation in 2003-2016. <i>Vestnik dermatologii i venerologii</i> . 2017(6):22-33.                                                          |
| Russia            | Odinets et al. (2017)     | 2010-2016 | Prevalence & Incidence | Low    | Yes | Odinets AV. The incidence of skin diseases in Stavropol territory in 2010—2016. <i>Klinicheskaya dermatologiya i venerologiya</i> . 2017;16(6):32-7.                                                                                                          |
| Scotland          | Campion et al. (1983)     | NR        | Prevalence             | High   | No  | Campion PD. Psoriasis and cancer. <i>Journal of the Royal College of General Practitioners</i> . 1983;33(250):293-5.                                                                                                                                          |
| Scotland          | Simpson et al. (2002)     | 1998-1999 | Prevalence             | Medium | Yes | Simpson CR, Anderson WJA, Helms PJ, Taylor MW, Watson L, Prescott GJ, et al. Coincidence of immune-mediated diseases driven by                                                                                                                                |
| Scotland          | McHattie et al. (2012)    | NR        | Prevalence             | High   | Yes | McHattie LW, Diack HL, Derek S, Ormerod AO, Burden AD. Epidemiology of psoriasis and psoriatic arthritis in Scotland. <i>Dermatol Ther</i> . 2012;2(10):S4.                                                                                                   |

|           |                                    |           |            |      |     |                                                                                                                                                                                                                                                                                                       |
|-----------|------------------------------------|-----------|------------|------|-----|-------------------------------------------------------------------------------------------------------------------------------------------------------------------------------------------------------------------------------------------------------------------------------------------------------|
| Spain     | Ferrandiz et al. (2001)            | 1998      | Prevalence | Low  | No  | Ferrandiz C, Bordas X, Garcia-Patos V, Puig S, Pujol R, Smandia A. Prevalence of psoriasis in Spain (Epiderma Project: phase I). <i>Journal of the European Academy of Dermatology &amp; Venereology</i> . 2001;15(1):20-3.                                                                           |
| Spain     | Fernandez-Sueiro et al. (2012)     | NR        | Prevalence | High | Yes | Fernandez-Sueiro JL, Pinto JA, Pertega-Diaz S, Acasuso M, De Padura IH. Prevalence of psoriasis and psoriatic arthritis in a Northern population of Spain. <i>Arthritis and Rheumatism</i> . 2012;64:S247.                                                                                            |
| Spain     | Ferrandiz et al. (2014)            | 2012-2013 | Prevalence | Low  | Yes | Ferrandiz C, Carrascosa JM, Toro M. Prevalence of psoriasis in Spain in the age of biologics. [Spanish] Prevalencia de la psoriasis en España en la era de los agentes biológicos. <i>Actas Dermo-Sifiliográficas</i> . 2014;105(5):504-9.                                                            |
| Spain     | Siso-Almirall et al. (2018)        | 2016      | Prevalence | High | Yes | Siso-Almirall A, Kostov B, Martínez Carbonell E, Retamozo S, Flores-Chavez A, González-Martínez S, et al. Prevalence of autoimmune diseases in Catalonia: A population based study using a public big data analytics (PADRIS). <i>Annals of the Rheumatic Diseases</i> . 2018;77 (Supplement 2):1760. |
| Spain     | Fernandez-Armenteros et al. (2019) | 2003-2016 | Prevalence | Low  | Yes | Fernandez-Armenteros JM, Gómez-Arbonés X, Buti-Solé M, Betriu-Bars A, Sanmartín-Novell V, Ortega-Bravo M, et al. Epidemiology of Psoriasis. A Population-Based Study. <i>Actas Dermo-Sifiliográficas</i> . 2019;110(5):385-92.                                                                        |
| Sri-Lanka | Perera et al. (2000)               | 1997      | Prevalence | Low  | Yes | Perera A, Atukorale DN, Sivayogan S, Ariyaratne VS, Karunaratne LA. Prevalence of skin diseases in suburban Sri Lanka. <i>Ceylon Medical Journal</i> . 2000;45(3):123-8.                                                                                                                              |
| Sweden    | Hellgren et al. (1967)             | 1961-1963 | Prevalence | Low  | Yes | Hellgren L. Psoriasis. Prevalence in sex age and occupational groups in total populations Sweden. Morphology, inheritance and association with other skin and rheumatic diseases. Stockholm: Almqvist and Wiksell; (1967).                                                                            |
| Sweden    | Larsson et al. (1980)              | 1975-1976 | Prevalence | Low  | Yes | Larsson PA, Liden S. Prevalence of skin diseases among adolescents 12--16 years of age. <i>Acta Dermato-Venereologica</i> . 1980;60(5):415-23.                                                                                                                                                        |

|        |                          |           |            |        |     |                                                                                                                                                                                                                                                                                                         |
|--------|--------------------------|-----------|------------|--------|-----|---------------------------------------------------------------------------------------------------------------------------------------------------------------------------------------------------------------------------------------------------------------------------------------------------------|
| Sweden | Lindberg et al. (2014)   | NR        | Prevalence |        | Yes | Lindberg M, Isacson D, Binge-fors K. Self-reported skin diseases, quality of life and medication use: a nationwide pharmaco-epidemiological survey in Sweden. <i>ActaDermato-Venereologica</i> . 2014;94(2):188-91.                                                                                     |
| Sweden | Lofvendahl et al. (2014) | 2005-2010 | Prevalence | Low    | Yes | Lofvendahl S, Theander E, Svensson A, Carlsson KS, Englund M, Petersson IF. Validity of diagnostic codes and prevalence of physician-diagnosed psoriasis and psoriatic arthritis in southern Sweden - A population-based register study. <i>PLoS ONE</i> . 2014;9 (5) (no pagination)(e98024).          |
| Taiwan | Yang et al. (2007)       | 2004      | Prevalence | Medium | Yes | Yang YC, Cheng YW, Lai CS, Chen W. Prevalence of childhood acne, ephelides, warts, atopic dermatitis, psoriasis, alopecia areata and keloid in Kaohsiung County, Taiwan: a community-based clinical survey. <i>Journal of the European Academy of Dermatology &amp; Venereology</i> . 2007;21(5):643-9. |
| Taiwan | Chen et al. (2008)       | 2005      | Prevalence | Medium | Yes | Chen G-Y, Cheng Y-W, Wang C-Y, Hsu T-J, Hsu MM-L, Yang P-T, et al. Prevalence of skin diseases among schoolchildren in Magong, Penghu, Taiwan: a community-based clinical survey. <i>Journal of the Formosan Medical Association</i> . 2008;107(1):21-9.                                                |
| Taiwan | Chang et al. (2009)      | 2000-2006 | Prevalence | Medium | No  | Chang Y-T, Chen T-J, Liu P-C, Chen Y-C, Chen Y-J, Huang Y-L, et al. Epidemiological study of psoriasis in the national health insurance database in Taiwan. <i>ActaDermato-Venereologica</i> . 2009;89(3):262-6.                                                                                        |
| Taiwan | Tsai et al. (2011)       | 2006      | Prevalence | Low    | No  | Tsai TF, Wang TS, Hung ST, Tsai PIC, Schenkel B, Zhang M, et al. Epidemiology and comorbidities of psoriasis patients in a national database in Taiwan. <i>Journal of Dermatological Science</i> . 2011;63(1):40-6.                                                                                     |
| Taiwan | Chiang et al. (2012)     | 2004-2005 | Prevalence | Medium | No  | Chiang YY, Lin HW. Association between psoriasis and chronic obstructive pulmonary disease: a population-based study in Taiwan. <i>Journal of the European Academy of Dermatology &amp; Venereology</i> . 2012;26(1):59-65.                                                                             |

|                 |                          |           |                        |        |     |                                                                                                                                                                                                                                                          |
|-----------------|--------------------------|-----------|------------------------|--------|-----|----------------------------------------------------------------------------------------------------------------------------------------------------------------------------------------------------------------------------------------------------------|
| Taiwan          | Wang et al. (2016)       | 2003-2013 | Prevalence             | Low    | Yes | Wang TS, Hsieh CF, Tsai TF. Epidemiology of psoriatic disease and current treatment patterns from 2003 to 2013: A nationwide, population-based observational study in Taiwan. <i>Journal of Dermatological Science</i> . 2016;84(3):340-5.               |
| Taiwan          | Wei et al. (2018)        | 2000-2013 | Prevalence & Incidence | Low    | Yes | Wei JCC, Shi LH, Huang JY, Wu XF, Wu R, Chiou JY. Epidemiology and medication pattern change of psoriatic diseases in Taiwan from 2000 to 2013: A nationwide, population-based cohort study. <i>Journal of Rheumatology</i> . 2018;45(3):385-92.         |
| Tanzania        | Gibbs et al. (1996)      | 1994      | Prevalence             | Low    | Yes | Gibbs. Skin disease and socioeconomic conditions in rural Africa: Tanzania. <i>Int J Dermatol</i> . 1996; 35(9):633-9.                                                                                                                                   |
| Tunisia         | El Fekih et al. (2007)   | NR        | Prevalence             | High   | Yes | El Fekih N, Khaled A, Kharfi M, Sellami A, Zeglaoui F, Fazaa B, et al. Epidemiology of psoriasis in Tunisia. <i>Journal of the European Academy of Dermatology and Venereology</i> . 2007;21:41.                                                         |
| The Netherlands | Westert et al. (2005)    | 2001      | Prevalence             | Medium | Yes | Westert GP, Schellevis FG, de Bakker DH, Groenewegen PP, Bensing JM, van der Zee J. Monitoring health inequalities through general practice: the Second Dutch National Survey of General Practice. <i>Eur J Public Health</i> . 2005; 15(1):59-65.       |
| The Netherlands | Karreman et al. (2016)   | 2013-2014 | Prevalence             | Low    | Yes | Karreman MC, Weel A, van der Ven M, Vis M, Tchetterikov I, Nijsten TEC, et al. Prevalence of Psoriatic Arthritis in Primary Care Patients With Psoriasis. <i>Arthritis &amp; Rheumatology</i> . 2016;68(4):924-31.                                       |
| The Netherlands | Dowlatsahi et al. (2017) | 2002-2012 | Prevalence             | Medium | Yes | Dowlatsahi EA, Hollestein LM, Herings RM, Nijsten T, Wakkee M. Increased overall drug utilization in patients with psoriasis: a case-control study based on Dutch general practitioner data. <i>British Journal of Dermatology</i> . 2017;176(3):634-42. |
| The Netherlands | Sanders et al. (2017)    | 2010      | Prevalence             | Medium | No  | Sanders MGH, Pardo LM, Verkouteren JAC, Hamann SAS, Hamer MA, Nijsten T. Dermatological screening of a middle-aged and elderly population: the Rotterdam Study. <i>British Journal of Dermatology</i> . 2017;177(4):e98-e100.                            |

|        |                          |            |            |        |     |                                                                                                                                                                                                                             |
|--------|--------------------------|------------|------------|--------|-----|-----------------------------------------------------------------------------------------------------------------------------------------------------------------------------------------------------------------------------|
| Turkey | Cakir et al. (2012)      | NR         | Prevalence | Low    | Yes | Cakir N, Pamuk ON, Dervis E, Imeryuz N, Uslu H, Benian O, et al. The prevalences of some rheumatic diseases in western Turkey: Havsa study. <i>Rheumatology International</i> . 2012;32(4):895-908.                         |
| Turkey | Serdaroğlu et al. (2012) | NR         | Prevalence | Low    | Yes | Server Serdaroğlu, Ali HaydarParlak, Burhan Engin, NilgünBahçetepe, S. E. Bayer Keskin et al. The prevalence of psoriasis and veitiligo in a rural area in Turkey. <i>J Turk AcadDermatol</i> 2012; 6 (1): 1261a2.          |
| Turkey | Bas et al. (2016)        | 2012-2013  | Prevalence | Low    | Yes | Bas Y, Seckin HY, Kalkan G, Takci Z, Cital R, Onder Y, et al. Prevalence and related factors of psoriasis and seborrheic dermatitis: A communitybased study. <i>Turkish Journal of Medical Sciences</i> . 2016;46(2):303-9. |
| Turkey | Yayli et al. (2016)      | NR         | Prevalence |        | Yes | Yayli S, Topbas M, Arica DA, Tugcugil S, Capkin E, Bahadir S. The prevalence of psoriasis in Trabzon. <i>Turkderm-Archives of the Turkish Dermatology and Venerology</i> . 2016;50(4):141-4.                                |
| UK     | Williams et al. (1994)   | 1969, 1974 | Prevalence | Medium | Yes | Williams HC, Strachan DP. Psoriasis and eczema are not mutually exclusive diseases. <i>Dermatology</i> . 1994;189(3):238-40.                                                                                                |
| UK     | Nevitt et al. (1996)     | NR         | Prevalence | Low    | Yes | Nevitt GJ, Hutchinson PE. Psoriasis in the community: prevalence, severity and patients' beliefs and attitudes towards the disease. <i>British Journal of Dermatology</i> . 1996;135(4):533-7.                              |
| UK     | O'Neill et al. (1996)    | NR         | Prevalence | Low    | Yes | O'Neill P, Kelly P. Postal questionnaire study of disability in the community associated with psoriasis. <i>BMJ</i> . 1996 Oct 12;313(7062):919-21.                                                                         |
| UK     | Kay et al. (1999)        | NR         | Prevalence | Medium | Yes | Kay LJ, Parry-James JE, Walker DJ. The prevalence and impact of psoriasis and psoriatic arthritis in the primary care population in North East England. <i>Arthritis and Rheumatism</i> . 1999;42(9):S299-S.                |
| UK     | Gelfand et al. (2005)    | 1987-2002  | Prevalence |        | No  | Gelfand JM, Weinstein R, Porter SB, Neimann AL, Berlin JA, Margolis DJ. Prevalence and treatment of psoriasis in the United Kingdom: a population-based study. <i>Archives of Dermatology</i> . 2005;141(12):1537-41.       |

|     |                         |           |                        |        |     |                                                                                                                                                                                                                                                 |
|-----|-------------------------|-----------|------------------------|--------|-----|-------------------------------------------------------------------------------------------------------------------------------------------------------------------------------------------------------------------------------------------------|
| UK  | Gillard et al. (2005)   | 2002-2003 | Prevalence             | High   | Yes | Gillard SE, Finlay AY. Current management of psoriasis in the United Kingdom: patterns of prescribing and resource use in primary care. <i>International Journal of Clinical Practice</i> . 2005;59(11):1260-7.                                 |
| UK  | Seminara et al. (2011)  | NR        | Prevalence             | Low    | Yes | Seminara NM, Abuabara K, Shin DB, Langan SM, Kimmel SE, Margolis D, et al. Validity of The Health Improvement Network (THIN) for the study of psoriasis. <i>British Journal of Dermatology</i> . 2011;164(3):602-9.                             |
| UK  | Ogdie et al. (2013)     | 1994-2010 | Prevalence             | Medium | No  | Ogdie A, Langan S, Love T, Haynes K, Shin D, Seminara N, et al. Prevalence and treatment patterns of psoriatic arthritis in the UK. <i>Rheumatology</i> . 2013;52(3):568-75.                                                                    |
| UK  | Springate et al. (2017) | 1999-2013 | Prevalence & Incidence | Low    | Yes | Springate DA, Parisi R, Kontopantelis E, Reeves D, Griffiths CEM, Ashcroft DM. Incidence, prevalence and mortality of patients with psoriasis: a U.K. population-based cohort study. <i>British Journal of Dermatology</i> . 2017;176(3):650-8. |
| USA | Johnson et al. (1978)   | 1971-1974 | Prevalence             | Low    | No  | Johnson M, Roberts J. Skin conditions and related need for medical care among persons 1-74 years. United States, 1971-1974. <i>Vital Health Stat</i> . 1978;11(i-v):1-72.                                                                       |
| USA | Koo et al. (1996)       | 1991-1993 | Prevalence             | Medium | Yes | Koo J. Population-based epidemiologic study of psoriasis with emphasis on quality of life assessment. <i>Dermatologic Clinics</i> . 1996;14(3):485-96.                                                                                          |
| USA | Javitz et al. (2002)    | 1993-1995 | Prevalence             | Medium | No  | Javitz HS, Ward MM, Farber E, Nail L, Vallow SG. The direct cost of care for psoriasis and psoriatic arthritis in the United States. <i>Journal of the American Academy of Dermatology</i> . 2002;46(6):850-60.                                 |
| USA | Gelfand et al. (2004)   | 2001      | Prevalence             | Low    | No  | Gelfand JM, Feldman SR, Stern RS, Thomas J, Rolstad T, Margolis DJ. Determinants of quality of life in patients with psoriasis: A study from the US population. <i>Journal of the American Academy of Dermatology</i> . 2004;51(5):704-8.       |

|     |                          |                         |            |        |     |                                                                                                                                                                                                                                                                                       |
|-----|--------------------------|-------------------------|------------|--------|-----|---------------------------------------------------------------------------------------------------------------------------------------------------------------------------------------------------------------------------------------------------------------------------------------|
| USA | Stern et al. (2004)      | 2001                    | Prevalence | Low    | Yes | Stern RS, Nijsten T, Feldman SR, Margolis DJ, Rolstad T. Psoriasis is common, carries a substantial burden even when not extensive, and is associated with widespread treatment dissatisfaction. <i>Journal of Investigative Dermatology Symposium Proceedings</i> . 2004;9(2):136-9. |
| USA | Gelfand et al. (2005)    | 2001                    | Prevalence | Low    | No  | Gelfand JM, Stern RS, Nijsten T, Feldman SR, Thomas J, Kist J, et al. The prevalence of psoriasis in African Americans: results from a population-based study. <i>Journal of the American Academy of Dermatology</i> . 2005;52(1):23-6.                                               |
| USA | Kurd et al. (2009)       | 2003-2004               | Prevalence | Low    | No  | Kurd SK, Gelfand JM. The prevalence of previously diagnosed and undiagnosed psoriasis in US adults: Results from NHANES 2003-2004. <i>Journal of the American Academy of Dermatology</i> . 2009;60(2):218-24.                                                                         |
| USA | Wu et al. (2009)         | 2004                    | Prevalence | Medium | No  | Wu Y, Mills D, Bala M. Impact of psoriasis on patients work and productivity: A retrospective, matched case-control analysis. <i>American Journal of Clinical Dermatology</i> . 2009;10(6):407-10.                                                                                    |
| USA | Helmick et al. (2014)    | 2003-2006;<br>2009-2010 | Prevalence | Low    | Yes | Helmick CG, Lee-Han H, Hirsch SC, Baird TL, Bartlett CL. Prevalence of psoriasis among adults in the U.S.: 2003-2006 and 2009-2010 National Health and Nutrition Examination Surveys. <i>American Journal of Preventive Medicine</i> . 2014;47(1):37-45.                              |
| USA | Rachakonda et al. (2014) | 2009-2010               | Prevalence | Low    | No  | Rachakonda TD, Schupp CW, Armstrong AW. Psoriasis prevalence among adults in the United States. <i>Journal of the American Academy of Dermatology</i> . 2014;70(3):512-6.                                                                                                             |
| USA | Swary et al. (2015)      | 2011-2013               | Prevalence | Medium | Yes | Swary JH, Stratman EJ. Identifying Performance Gaps in Comorbidity and Risk Factor Screening, Prevention, and Counseling Behaviors of Providers Caring for Children with Psoriasis. <i>Pediatric Dermatology</i> . 2015;32(6):813-8.                                                  |



|                                                               |                         |           |            |        |     |                                                                                                                                                                                                                                                                                                                               |
|---------------------------------------------------------------|-------------------------|-----------|------------|--------|-----|-------------------------------------------------------------------------------------------------------------------------------------------------------------------------------------------------------------------------------------------------------------------------------------------------------------------------------|
| USA                                                           | Mendelson et al. (2017) | 2010-2012 | Prevalence | Medium | Yes | Mendelson MH, Bernstein JA, Gabriel S, Balp MM, Tian H, Vietri J, et al. Patient-reported impact of chronic urticaria compared with psoriasis in the United States. <i>Journal of Dermatological Treatment</i> . 2017;28(3):229-36.                                                                                           |
| Wales                                                         | Cooksey et al. (2018)   | 1999-2013 | Prevalence | Medium | Yes | Cooksey R, Brophy S, Kennedy J, Gutierrez FF, Pickles T, Davies R, et al. Cardiovascular risk factors predicting cardiac events are different in patients with rheumatoid arthritis, psoriatic arthritis, and psoriasis. <i>Seminars in Arthritis and Rheumatism</i> . 2018;48(3):367-73.                                     |
| Yugoslavia                                                    | Arzensek et al. (1984)  | 1979-1981 | Prevalence | Medium | Yes | Arzensek J, Kinsky A, Kavcic C. Epidemiology of psoriasis in the Celje area. <i>Acta Dermato-Venereologica</i> . 1984;64(SUPPL. 113):106-8.                                                                                                                                                                                   |
| <i>Multiple countries:</i><br>Algeria,<br>Tunisia,<br>Morocco | Benchikhi et al. (2012) |           | Prevalence |        | Yes | Benchikhi H, Amal S, Ammar-Khodja A, Benkaidali I, Bouadjar B, Dhaoui M, et al. Étude PSOMAG : prévalence des cas de psoriasis au Maghreb. <i>Annales de Dermatologie et de Vénérologie</i> . 2012;139(12S):B162-B3.                                                                                                          |
| <i>Multiple countries:</i><br>France,<br>Spain.               | Lillie et al. (2012)    | 2010      | Prevalence | High   | Yes | Lillie M, Hellard C. Prevalence of psoriasis and patient co-morbidities in general practice patients in four European countries. <i>Journal of Investigative Dermatology</i> . 2012;132:S71.                                                                                                                                  |
| <i>Multiple countries:</i><br>Canada,<br>France,<br>Germany.  | Lebwohl et al. (2014)   | 2012      | Prevalence | Medium | Yes | Lebwohl MG, Bachelez H, Barker J, Girolomoni G, Kavanaugh A, Langley RG, et al. Patient perspectives in the management of psoriasis: results from the population-based Multinational Assessment of Psoriasis and Psoriatic Arthritis Survey. <i>Journal of the American Academy of Dermatology</i> . 2014;70(5):871-81.e1-30. |

|                                                                                             |                         |                     |            |        |     |                                                                                                                                                                                                                                                                                                                                            |
|---------------------------------------------------------------------------------------------|-------------------------|---------------------|------------|--------|-----|--------------------------------------------------------------------------------------------------------------------------------------------------------------------------------------------------------------------------------------------------------------------------------------------------------------------------------------------|
| <i>Multiple countries:</i><br>France,<br>Germany,<br>Italy, Spain,<br>UK.                   | Augustin et al. (2017)  | 2010, 2011,<br>2013 | Prevalence | Medium | Yes | Augustin M, Vietri J, Tian H, Gilloteau I. Incremental burden of cardiovascular comorbidity and psoriatic arthritis among adults with moderate-to-severe psoriasis in five European countries. <i>Journal of the European Academy of Dermatology and Venereology</i> . 2017;31(8):1316-23.                                                 |
| <i>Multiple Countries:</i><br>Germany,<br>Italy, The<br>Netherlands,<br>Portugal,<br>Sweden | Svensson et al. (2018)  | 2008-2011           | Prevalence | Low    | Yes | Svensson A, Ofenloch RF, Bruze M, Naldi L, Cazzaniga S, Elsner P, et al. Prevalence of skin disease in a population-based sample of adults from five European countries. <i>British Journal of Dermatology</i> . 2018;178(5):1111-8.                                                                                                       |
| <i>Multiple Countries:</i><br>Denmark,<br>Norway,<br>Sweden                                 | Danielsen et al. (2019) | 2015-2017           | Prevalence | Medium | Yes | Danielsen K, Duvetorp A, Iversen L, Ostergaard M, Seifert O, Steinar Tveit K, et al. Prevalence of Psoriasis and Psoriatic Arthritis and Patient Perceptions of Severity in Sweden, Norway and Denmark: Results from the Nordic Patient Survey of Psoriasis and Psoriatic Arthritis. <i>Acta Dermato-Venereologica</i> . 2019;99(1):18-25. |

---

**Abbreviation: NR, not reported.**

**eTable 3: Studies reporting on the prevalence of psoriasis in children**

| Study                         | Study time | Country | Diagnostic method | Population size | Age   | Type of rate | Prevalence rate % (95% CI)          | Prevalence rate % (95% CI)         | Prevalence rate % (95% CI)         |
|-------------------------------|------------|---------|-------------------|-----------------|-------|--------------|-------------------------------------|------------------------------------|------------------------------------|
|                               |            |         |                   |                 |       |              |                                     | Female                             | Male                               |
| Bechelli <i>et al.</i> 1981   | 1974-1975  | Brazil  | D                 | 9955            | 6-16  | PT           | 0 <sup>2</sup>                      | 0 <sup>2</sup>                     | 0 <sup>2</sup>                     |
| Wang <i>et al.</i> 2012       | 2008-2009  | China   | D                 | 7747            | 12-20 | PT           | 0.71 (0.52 to 0.90) <sup>2,3</sup>  | 1.05 (0.76 to 1.34) <sup>2,3</sup> | 0.20 (0.04 to 0.35) <sup>2,3</sup> |
| Blegvad <i>et al.</i> 2017    | 2012       | Denmark | Ph                | 1196637         | <18   | LT           | 0.16 (0.15-0.17) <sup>2,3</sup>     | 0.18 (0.17-0.19) <sup>2,3</sup>    | 0.14 (0.13-0.15) <sup>2,3</sup>    |
| Yamamah <i>et al.</i> 2012    | 2008-2009  | Egypt   | D                 | NR              | 0-18  | PT           | 0.05 <sup>1,4</sup>                 | NR                                 | NR                                 |
| El-Khateeb <i>et al.</i> 2014 | 2011-2012  | Egypt   | D                 | 6162            | 6-12  | PT           | 0.06 (0.001 to 0.13) <sup>2,3</sup> | NR                                 | NR                                 |
| Nada <i>et al.</i> 2014       | 2009-2010  | Egypt   | NR                | 3100            | 6-12  | PT           | 0.10 (0.00 to 0.15) <sup>2,3</sup>  | NR                                 | NR                                 |
| Dogra <i>et al.</i> 2003      | 2001       | India   | D                 | 12586           | 6-14  | PT           | 0.02 (0.00 to 0.05) <sup>2,3</sup>  | NR                                 | NR                                 |
| Naldi <i>et al.</i> 2009      | 1997       | Italy   | Ph                | 3155            | 12-17 | LT           | 2.10 (1.65 to 2.66) <sup>2,3</sup>  | NR                                 | NR                                 |
| Cantarutti <i>et al.</i> 2015 | 2006       | Italy   | Ph                | 145233          | 0-14  | PT           | 0.09 (0.08 to 0.11) <sup>1</sup>    | NR                                 | NR                                 |
|                               | 2007       |         |                   |                 |       |              | 0.13 (0.11 to 0.15) <sup>1</sup>    | NR                                 | NR                                 |
|                               | 2008       |         |                   |                 |       |              | 0.16 (0.14 to 0.19) <sup>1</sup>    | NR                                 | NR                                 |
|                               | 2009       |         |                   |                 |       |              | 0.19 (0.17 to 0.22) <sup>1</sup>    | NR                                 | NR                                 |
|                               | 2010       |         |                   |                 |       |              | 0.21 (0.19 to 0.24) <sup>1</sup>    | NR                                 | NR                                 |
|                               | 2011       |         |                   |                 |       |              | 0.21 (0.19 to 0.24) <sup>1</sup>    | NR                                 | NR                                 |
|                               | 2012       |         |                   |                 |       |              | 0.22 (0.20 to 0.25) <sup>1</sup>    | NR                                 | NR                                 |

|                                    |           |         |      |         |       |    |                                    |                                    |                                    |
|------------------------------------|-----------|---------|------|---------|-------|----|------------------------------------|------------------------------------|------------------------------------|
| Augustin <i>et al.</i> 2010        | 2005      | Germany | Ph   | 306020  | 0-18  | LT | 0.71 <sup>1</sup>                  | 0.76 <sup>1,4</sup>                | 0.66 <sup>1,4</sup>                |
| Schmitt <i>et al.</i> 2010         |           | Germany | Ph   | 16500   | 0-17  | LT | 1.37 (1.19 to 1.55) <sup>2,3</sup> | NR                                 | NR                                 |
| Kampfe <i>et al.</i> 2012          | 2009      | Germany | D/Ph | 293181  | 0-18  | LT | 0.45 (0.42 to 0.47) <sup>2,3</sup> | 0.48 <sup>1,4</sup>                | 0.42 <sup>1,4</sup>                |
| Augustin <i>et al.</i> 2013        | 2009      | Germany | D/Ph | 293181  | 0-18  | LT | 0.45 (0.42 to 0.47) <sup>2,3</sup> | 0.48 (0.44 to 0.52) <sup>2,3</sup> | 0.42 (0.38 to 0.45) <sup>2,3</sup> |
| Matusiewicz <i>et al.</i><br>2014  | 2007      | Germany |      | 1215684 | 0-18  | LT | 0.40 (0.40 to 0.40) <sup>1,5</sup> | 0.44 (0.43 to 0.46) <sup>1,5</sup> | 0.35 (0.33 to 0.36) <sup>1,5</sup> |
| Augustin <i>et al.</i> 2015        | 2009      | Germany | D/Ph | 293181  | 0-18  | LT | 0.45 (0.42 to 0.47) <sup>2,3</sup> | NR                                 | NR                                 |
| Jacobi <i>et al.</i> 2015          | 2009      | Germany | D/Ph | 293181  | 0-18  | LT | 0.45 (0.42 to 0.47) <sup>2,3</sup> | 0.48 (0.44 to 0.52) <sup>1</sup>   | 0.42 (0.38 to 0.45) <sup>1</sup>   |
| Matterne <i>et al.</i> 2016        | 2003-2006 | Germany | SR   | 6009    | 11-17 | LT | 1.9 (1.5 to 2.3) <sup>1</sup>      | NR                                 | NR                                 |
| Biermann <i>et al.</i> 2019        | 2017      | Germany |      |         |       | PT | 0.12 <sup>1,4</sup>                | NR                                 | NR                                 |
| Abolfotouh <i>et al.</i> 1996      |           | KSA     | D    | 2376    | 5-13  | PT | NR                                 | NR                                 | 0.04 (0.00 to 0.12) <sup>2,3</sup> |
| Al-Saeed <i>et al.</i> 2006        | 2003      | KSA     | D    | 2239    | 6-17  | PT | NR                                 | 0.30 (0.05 to 0.48) <sup>2,3</sup> | NR                                 |
| Amin <i>et al.</i> 2011            |           | KSA     | D    | 1337    | 6-13  | PT | NR                                 | NR                                 | 0.10 (0.00 to 0.50) <sup>1</sup>   |
| Rahamathulla <i>et al.</i><br>2019 | 2016      | KSA     | SR   | 499     | 3-15  | PT | 0.60 (0.00-1.28) <sup>2,3</sup>    | NR                                 | NR                                 |
| Popescu <i>et al.</i> 1999         | 1995      | Romania | D    | 1114    | 6-12  | PT | 0.27 (0.00 to 0.57) <sup>2,3</sup> | NR                                 | NR                                 |
| Larsson <i>et al.</i> 1980         | 1975-1976 | Sweden  | D    | 8298    | 12-17 | PT | 0.30 (0.20 to 0.45) <sup>2,3</sup> | 0.50 (0.30 to 0.74) <sup>2,3</sup> | 0.10 (0.03 to 0.25) <sup>2,3</sup> |
| Yang <i>et al.</i> 2007            | 2004      | Taiwan  | D    | 4067    | 6-11  | PT | 0 <sup>2</sup>                     | NR                                 | NR                                 |
| Chen <i>et al.</i> 2008            | 2005      | Taiwan  | D    | 3273    | 6-11  | PT | 0 <sup>2</sup>                     | NR                                 | NR                                 |

|                                                                                                                                                                                                                                                                                                                                                                                                                                                                                                                                              |           |     |                 |        |      |    |                                    |    |    |
|----------------------------------------------------------------------------------------------------------------------------------------------------------------------------------------------------------------------------------------------------------------------------------------------------------------------------------------------------------------------------------------------------------------------------------------------------------------------------------------------------------------------------------------------|-----------|-----|-----------------|--------|------|----|------------------------------------|----|----|
| Williams <i>et al.</i> 1994                                                                                                                                                                                                                                                                                                                                                                                                                                                                                                                  | 1969      | UK  | Medical Officer | 9263   | 11   | PP | 0.50 (0.34 to 0.63) <sup>2,3</sup> | NR | NR |
|                                                                                                                                                                                                                                                                                                                                                                                                                                                                                                                                              | 1974      |     |                 |        | 16   |    | 0.80 (0.65 to 1.02) <sup>2,3</sup> |    |    |
| Swary <i>et al.</i> 2015                                                                                                                                                                                                                                                                                                                                                                                                                                                                                                                     | 2011-2013 | USA | D/Ph            | 128094 | 0-18 | PP | 0.11 (0.10 to 0.13) <sup>2,3</sup> | NR | NR |
| <p>Diagnostic methods: D = Dermatologists; Ph = Physician; SR = Self-reported diagnosis. Prevalence measure: PT = Point prevalence; PP = Period prevalence; LT = Lifetime prevalence. Notes: <sup>1</sup> Value reported from the study; <sup>2</sup> Rate checked and confirmed; <sup>3</sup> Confidence Interval (CI) estimated and added by the authors as it was not present in the original study; <sup>4</sup>It was not possible to calculate CI due to lack of raw data; <sup>5</sup> Age and/or sex adjusted. NR= Not Reported.</p> |           |     |                 |        |      |    |                                    |    |    |

**eTable 4: Studies reporting on the prevalence of psoriasis in adults**

| Study                            | Study time | Country   | Diagnostic method | Population size | Age | Type of rate | Prevalence rate % (95% CI)         | Prevalence rate % (95% CI) Female  | Prevalence rate % (95% CI) Male     |
|----------------------------------|------------|-----------|-------------------|-----------------|-----|--------------|------------------------------------|------------------------------------|-------------------------------------|
| Quirk <i>et al.</i> 1979         | NR         | Australia | Ph                | 1037            | NR  | PT           | 2.30 <sup>1,9</sup>                | NR                                 | NR                                  |
| Kilkenny <i>et al.</i> 1998      | 1996       | Australia | SR                | 416             | ≥18 | PT           | 4.50 (1.00 to 7.90) <sup>1</sup>   | NR                                 | NR                                  |
| Plunkett <i>et al.</i> 1999      | 1997-1998  | Australia | D                 | 1457            | ≥20 | PT           | 6.60 (5.40 to 7.90) <sup>1,5</sup> | 4.50 (3.20 to 6.30) <sup>1,5</sup> | 8.90 (6.80 to 11.00) <sup>1,5</sup> |
| Fujii <i>et al.</i> 2012         | 2011       | Brazil    | SR                | 12000           | ≥18 | PT           | 1.30 <sup>1</sup>                  | NR                                 | NR                                  |
| Ferreira <i>et al.</i> 2014      | 2012       | Brazil    | SR                | 12000           | NR  | PT           | 1.75 (1.52 to 1.98) <sup>3,6</sup> | NR                                 | NR                                  |
| DiBonaventura <i>et al.</i> 2018 | 2012       | Brazil    | SR                | 12000           | ≥18 | PT           | 1.75 (1.52 to 1.98) <sup>2,3</sup> | 1.76 (1.43 to 2.09) <sup>3,6</sup> | 1.74 (1.41 to 2.07) <sup>3,6</sup>  |
| Solomon <i>et al.</i> 2010       | 1996-2006  | Canada    | Ph                | 4310500         | NR  | PP           | 1.71 (1.70 to 1.73) <sup>2,3</sup> | NR                                 | NR                                  |
| Gregory <i>et al.</i> 2014       | 2008-2012  | Canada    | Ph                | 325618          | ≥18 | PP           | 2.39 (2.34 to 2.44) <sup>3,6</sup> | NR                                 | NR                                  |
| Petrella <i>et al.</i> 2014      | 2008-2012  | Canada    | Ph                | 325618          | ≥18 | PP           | 2.44 (2.38 to 2.49) <sup>2,3</sup> | NR                                 | NR                                  |
| Eder <i>et al.</i> 2017          | NR         | Canada    | Ph                | 30424           | NR  | PT           | 3.40 (3.18 to 3.58) <sup>2,3</sup> | NR                                 | NR                                  |
| Eder <i>et al.</i> 2017          | 2000-2015  | Canada    | Ph                | 10757627        | ≥20 | PP           | 2.25 <sup>1</sup>                  | NR                                 | NR                                  |
|                                  | 2000       |           |                   |                 |     |              | 1.43 (1.42 to 1.44) <sup>1,5</sup> | NR                                 | NR                                  |
|                                  | 2001       |           |                   |                 |     |              | 1.50 (1.49 to 1.50) <sup>1,5</sup> | NR                                 | NR                                  |
|                                  | 2002       |           |                   |                 |     |              | 1.56 (1.55 to 1.57) <sup>1,5</sup> | NR                                 | NR                                  |
|                                  | 2003       |           |                   |                 |     |              | 1.63 (1.62 to 1.63) <sup>1,5</sup> | NR                                 | NR                                  |
|                                  | 2004       |           |                   |                 |     |              | 1.69 (1.68 to 1.70) <sup>1,5</sup> | NR                                 | NR                                  |
|                                  | 2005       |           |                   |                 |     |              | 1.75 (1.74 to 1.76) <sup>1,5</sup> | NR                                 | NR                                  |
|                                  | 2006       |           |                   |                 |     |              | 1.81 (1.80 to 1.82) <sup>1,5</sup> | NR                                 | NR                                  |
|                                  | 2007       |           |                   |                 |     |              | 1.86 (1.86 to 1.87) <sup>1,5</sup> | NR                                 | NR                                  |

|                         |      |        |    |          |     |    |                                    |    |    |
|-------------------------|------|--------|----|----------|-----|----|------------------------------------|----|----|
|                         | 2008 |        |    |          |     |    | 1.91 (1.91 to 1.92) <sup>1,5</sup> | NR | NR |
|                         | 2009 |        |    |          |     |    | 1.96 (1.95 to 1.97) <sup>1,5</sup> | NR | NR |
|                         | 2010 |        |    |          |     |    | 2.00 (2.00 to 2.01) <sup>1,5</sup> | NR | NR |
|                         | 2011 |        |    |          |     |    | 2.05 (2.04 to 2.06) <sup>1,5</sup> | NR | NR |
|                         | 2012 |        |    |          |     |    | 2.09 (2.09 to 2.10) <sup>1,5</sup> | NR | NR |
|                         | 2013 |        |    |          |     |    | 2.14 (2.13 to 2.15) <sup>1,5</sup> | NR | NR |
|                         | 2014 |        |    |          |     |    | 2.19 (2.18 to 2.20) <sup>1,5</sup> | NR | NR |
|                         | 2015 |        |    |          |     |    | 2.24 (2.23 to 2.25) <sup>1,5</sup> | NR | NR |
| Eder <i>et al.</i> 2019 | 2000 | Canada | Ph | 8768082  | ≥20 | PP | 1.74 (1.73 to 1.75) <sup>1,5</sup> | NR | NR |
|                         | 2001 |        |    | 8958878  |     |    | 1.80 (1.79 to 1.81) <sup>1,5</sup> | NR | NR |
|                         | 2002 |        |    | 9094208  |     |    | 1.86 (1.85 to 1.86) <sup>1,5</sup> | NR | NR |
|                         | 2003 |        |    | 9227868  |     |    | 1.91 (1.90 to 1.92) <sup>1,5</sup> | NR | NR |
|                         | 2004 |        |    | 9355095  |     |    | 1.97 (1.96 to 1.98) <sup>1,5</sup> | NR | NR |
|                         | 2005 |        |    | 9475920  |     |    | 2.02 (2.01 to 2.03) <sup>1,5</sup> | NR | NR |
|                         | 2006 |        |    | 9593910  |     |    | 2.07 (2.06 to 2.08) <sup>1,5</sup> | NR | NR |
|                         | 2007 |        |    | 9699525  |     |    | 2.12 (2.11 to 2.12) <sup>1,5</sup> | NR | NR |
|                         | 2008 |        |    | 9829603  |     |    | 2.15 (2.14 to 2.16) <sup>1,5</sup> | NR | NR |
|                         | 2009 |        |    | 9988048  |     |    | 2.18 (2.17 to 2.19) <sup>1,5</sup> | NR | NR |
|                         | 2010 |        |    | 10124330 |     |    | 2.21 (2.20 to 2.22) <sup>1,5</sup> | NR | NR |
|                         | 2011 |        |    | 10277982 |     |    | 2.24 (2.23 to 2.25) <sup>1,5</sup> | NR | NR |
|                         | 2012 |        |    | 10425784 |     |    | 2.26 (2.26 to 2.27) <sup>1,5</sup> | NR | NR |
|                         | 2013 |        |    | 10564887 |     |    | 2.29 (2.28 to 2.30) <sup>1,5</sup> | NR | NR |
|                         | 2014 |        |    | 10655455 |     |    | 2.31 (2.30 to 2.32) <sup>1,5</sup> | NR | NR |

|                                   |           |         |       |          |                            |    |                                    |                                    |                                    |
|-----------------------------------|-----------|---------|-------|----------|----------------------------|----|------------------------------------|------------------------------------|------------------------------------|
|                                   | 2015      |         |       | 10774802 |                            |    | 2.32 (2.31-2.33) <sup>1,5</sup>    | NR                                 | NR                                 |
| Li <i>et al.</i> 2012             | NR        | China   | NR    | 10556    | ≥16                        | PT | 0.27 (0.17 to 0.36) <sup>1</sup>   | NR                                 | NR                                 |
| Barisic-Drusko <i>et al.</i> 1989 | 1987      | Croatia | D     | 6711     | >18                        | PT | 1.21 (0.94 to 1.47) <sup>2,3</sup> | NR                                 | NR                                 |
| Brandrup <i>et al.</i> 1981       | 1978      | Denmark | SR    | 3892     | 16-99                      | LT | 3.73 (3.13 to 4.32) <sup>3,6</sup> | 3.29 (2.50 to 4.08) <sup>2,3</sup> | 4.18 (3.28 to 5.07) <sup>2,3</sup> |
| Jensen <i>et al.</i> 2013         | 2006-2008 | Denmark | SR/Ph | 3374     | 18-69                      | LT | 7.10 (6.19 to 7.92) <sup>2,3</sup> | 7.35 (6.17 to 8.54) <sup>3,6</sup> | 6.68 (5.43 to 7.94) <sup>3,6</sup> |
| Mortz <i>et al.</i> 2014          | 2010      | Denmark | D     | 469      | 28-30                      | PT | 1.71 (0.53 to 2.88) <sup>3,6</sup> | NR                                 | NR                                 |
| Egeberg <i>et al.</i> 2019        | 2018      | Denmark | SR/Ph | 3449     | 18-75+                     | LT | 7.90 (7.00 to 8.80) <sup>1,2</sup> | 8.25 (7.02 to 9.49) <sup>2,3</sup> | 7.62 (6.29 to 8.95) <sup>2,3</sup> |
| Naldi <i>et al.</i> 2004          | 2003      | Italy   | SR    | 3660     | ≥45                        | LT | 3.10 <sup>1,8</sup>                | NR                                 | NR                                 |
| Sardu <i>et al.</i> 2012          | 2009      | Italy   | Ph    | 25885    | 15-89                      | PT | 0.94 (0.82 to 1.07) <sup>1</sup>   | 0.78 (0.64 to 0.94) <sup>1</sup>   | 1.14 (0.95 to 1.35) <sup>1</sup>   |
| Pezzolo <i>et al.</i> 2019        | 2003-2004 | Italy   | SR    | 14705    | 25-75+                     | LT | 2.70 (2.50 to 3.00) <sup>1</sup>   | 3.00 (2.74 to 3.51) <sup>1,3</sup> | 2.70 (2.16 to 2.90) <sup>1,3</sup> |
| Wolkenstein <i>et al.</i> 2009    | 2005      | France  | SR    | 6887     | ≥15                        | PP | 5.20 (4.65 to 5.69) <sup>2,3</sup> | NR                                 | NR                                 |
| Richard <i>et al.</i> 2018        | 2016      | France  | SR    | 20012    | ≥15                        | LT | 4.42 (4.15 to 4.72) <sup>1,4</sup> | 4.36 (3.98 to 4.77) <sup>1,2</sup> | 4.49 (4.10 to 4.92) <sup>1,2</sup> |
| Schmitt <i>et al.</i> 2010        | 2003-2004 | Germany | Ph    | 233566   | ≥15                        | LT | 1.40 <sup>2</sup>                  | NR                                 | NR                                 |
| Augustin <i>et al.</i> 2011       | 2007      | Germany | SR    | 15000    | ≥18                        | LT | 2.50 (2.29 to 2.80) <sup>2,3</sup> | NR                                 | NR                                 |
| Radtke <i>et al.</i> 2015         | NR        | Germany | NR    | 1349671  | ≥18                        | LT | 2.78 (2.75 to 2.80) <sup>2,3</sup> | 2.59 <sup>1,9</sup>                | 2.94 <sup>1,9</sup>                |
| Radtke <i>et al.</i> 2017         | 2009      | Germany | Ph    | 1349671  | ≥18                        | LT | 2.78 (2.75 to 2.80) <sup>2,3</sup> | 2.59 <sup>1,9</sup>                | 2.94 <sup>1,9</sup>                |
| Drewitz <i>et al.</i> 2018        | NR        | Germany | SR    | 1133     | NR                         | LT | 5.48 <sup>1,9</sup>                | NR                                 | NR                                 |
| Kavli <i>et al.</i> 1985          | 1979-1980 | Norway  | SR    | 14667    | 20-54                      | LT | 4.82 <sup>1,9</sup>                | 4.85 <sup>1,9</sup>                | 4.79 <sup>1,9</sup>                |
| Bo <i>et al.</i> 2008             | 2000-2001 | Norway  | SR    | 13514    | 30, 40, 45, 59, 60, 75, 76 | LT | 8.50 (8.00 to 8.93) <sup>2,3</sup> | 8.46 (7.83 to 9.09) <sup>3,6</sup> | 8.47 (7.76 to 9.17) <sup>3,6</sup> |
| Danielsen <i>et al.</i> 2013      | 1979-1980 | Norway  | SR    | 14434    | 20-79                      | LT | 4.80 <sup>1,9</sup>                | NR                                 | NR                                 |
|                                   | 1986-1987 |         |       | 16345    |                            |    | 6.90 <sup>1,9</sup>                | NR                                 | NR                                 |



|                             |           |                                    |      |        |       |    |                                    |                                    |                                     |
|-----------------------------|-----------|------------------------------------|------|--------|-------|----|------------------------------------|------------------------------------|-------------------------------------|
|                             | 1994-1995 |                                    |      | 22328  |       |    | 7.30 <sup>1,9</sup>                | NR                                 | NR                                  |
|                             | 2001-2002 |                                    |      | 6130   |       |    | 8.90 <sup>1,9</sup>                | NR                                 | NR                                  |
|                             | 2007-2008 |                                    |      | 10302  | 30-79 |    | 11.40 <sup>1,9</sup>               | NR                                 | NR                                  |
| Hoff <i>et al.</i> 2015     | 2006-2008 | Norway                             | SR   | 50806  | ≥20   | PP | 5.76 (5.56 to 5.96) <sup>3,6</sup> | NR                                 | NR                                  |
| Modalsli <i>et al.</i> 2016 | 2006-2008 | Norway                             | SR/D | 544    | ≥20   | LT | 8.00 (6.40 to 9.90) <sup>1,8</sup> | 7.00 (5.2 to 9.30) <sup>1,8</sup>  | 9.30 (6.70 to 12.80) <sup>1,8</sup> |
|                             |           |                                    | SR   | 50786  | ≥20   |    | 5.80 (5.60 to 6.00) <sup>1,8</sup> | 5.50 (5.30 to 5.80) <sup>1,8</sup> | 6.00 (5.70 to 6.40) <sup>1,8</sup>  |
| Videira <i>et al.</i> 2017  | 2015      | Portugal                           | Ph   | 53535  | ≥18   | PT | 0.92 (0.84 to 1.01) <sup>2,3</sup> | NR                                 | NR                                  |
| Oh <i>et al.</i> 2017       | 2002-2010 | Republic of Korea                  | Ph   |        | ≥20   | PP | 0.42 <sup>1,9</sup>                | NR                                 | NR                                  |
| Lindberg <i>et al.</i> 2014 | NR        | Sweden                             | SR   | 4875   | 18-84 | PT | 3.90 <sup>1,9</sup>                | NR                                 | NR                                  |
| Wei <i>et al.</i> 2018      | 2000      | Taiwan                             | NR   | 782166 | ≥16   | PP | 0.18 (0.17 to 0.19) <sup>1,4</sup> | NR                                 | NR                                  |
|                             | 2001      |                                    |      | 786095 |       |    | 0.19 (0.18 to 0.20) <sup>1,4</sup> | NR                                 | NR                                  |
|                             | 2002      |                                    |      | 788665 |       |    | 0.21 (0.20 to 0.22) <sup>1,4</sup> | NR                                 | NR                                  |
|                             | 2003      |                                    |      | 769328 |       |    | 0.22 (0.21 to 0.23) <sup>1,4</sup> | NR                                 | NR                                  |
|                             | 2004      |                                    |      | 761175 |       |    | 0.24 (0.23 to 0.25) <sup>1,4</sup> | NR                                 | NR                                  |
|                             | 2005      |                                    |      | 785193 |       |    | 0.24 (0.23 to 0.25) <sup>1,4</sup> | NR                                 | NR                                  |
|                             | 2006      |                                    |      | 794016 |       |    | 0.24 (0.23 to 0.26) <sup>1,4</sup> | NR                                 | NR                                  |
|                             | 2007      |                                    |      | 801074 |       |    | 0.25 (0.24 to 0.26) <sup>1,4</sup> | NR                                 | NR                                  |
|                             | 2008      |                                    |      | 808501 |       |    | 0.24 (0.23 to 0.25) <sup>1,4</sup> | NR                                 | NR                                  |
|                             | 2009      |                                    |      | 814615 |       |    | 0.25 (0.24 to 0.26) <sup>1,4</sup> | NR                                 | NR                                  |
|                             | 2010      |                                    |      | 820896 |       |    | 0.25 (0.24 to 0.26) <sup>1,4</sup> | NR                                 | NR                                  |
|                             | 2011      |                                    |      | 828046 |       |    | 0.27 (0.26 to 0.28) <sup>1,4</sup> | NR                                 | NR                                  |
| 2012                        | 835042    | 0.27 (0.26 to 0.29) <sup>1,4</sup> | NR   | NR     |       |    |                                    |                                    |                                     |

|                                                |           |                 |      |         |        |    |                                    |                                      |                                      |
|------------------------------------------------|-----------|-----------------|------|---------|--------|----|------------------------------------|--------------------------------------|--------------------------------------|
|                                                | 2013      |                 |      | 840193  |        |    | 0.28 (0.27 to 0.29) <sup>1,4</sup> | NR                                   | NR                                   |
| Westert <i>et al.</i> 2005                     | 2001      | The Netherlands | SR   | 1000    | ≥25    | PP | 2.60 (1.61 to 3.59) <sup>2,3</sup> | NR                                   | NR                                   |
| Karreman <i>et al.</i> 2016                    | 2013-2014 | The Netherlands | Ph   | 158046  | ≥18    | PT | 1.70 <sup>2</sup>                  | NR                                   | NR                                   |
| Sanders <i>et al.</i> 2017                     | 2010      | The Netherlands | D    | 5365    | ≥50    | PT | 3.30 (2.80 to 3.80) <sup>1,2</sup> | 2.91 (1.44 to 5.87) <sup>1,4</sup>   | 3.41 (1.59 to 7.38) <sup>1,4</sup>   |
| Bas <i>et al.</i> 2016                         | 2012-2013 | Turkey          | D    | 2325    | 20-87  | PT | 1.20 (0.76 to 1.65) <sup>2,3</sup> | 1.20 (0.58 to 1.75) <sup>2,3,6</sup> | 1.30 (0.58 to 1.93) <sup>2,3,6</sup> |
| Yayli <i>et al.</i> 2016                       | NR        | Turkey          | SR   | 7885    | 20-70+ | PT | 1.10 (0.87 to 1.33) <sup>2,3</sup> | 1.20 (0.83 to 1.52) <sup>2,3</sup>   | 1.00 (0.72 to 1.35) <sup>2,3</sup>   |
| O'Neill <i>et al.</i> 1996                     | NR        | UK              | Ph   | 58257   | 18-64  | LT | 1.30 (1.22 to 1.41) <sup>2,3</sup> | NR                                   | NR                                   |
| Kay <i>et al.</i> 1999                         | NR        | UK              | Ph   | 29348   |        | LT | 2.60 (2.45 to 2.81) <sup>2,3</sup> | NR                                   | NR                                   |
| Seminara <i>et al.</i> 2011                    | NR        | UK              | Ph   | 6260029 | ≥20    | PP | 2.20 <sup>2</sup>                  | NR                                   | NR                                   |
| Ogdie <i>et al.</i> 2013                       | 1994-2010 | UK              | Ph   | 4785619 | 18-90  | PP | 3.47 (3.45 to 3.48) <sup>3,6</sup> | NR                                   | NR                                   |
| Gelfand <i>et al.</i> 2004                     | 2001      | USA             | SR   | 27220   | ≥18    | LT | 2.20 (2.03 to 2.38) <sup>2,3</sup> | NR                                   | NR                                   |
| Stern <i>et al.</i> 2004                       | 2001      | USA             | SR   | 27220   | ≥18    | LT | 2.20 (2.00 to 2.40) <sup>1</sup>   | 2.50 (2.30 to 2.80) <sup>1</sup>     | 1.90 (1.60 to 2.10) <sup>1</sup>     |
| Stern <i>et al.</i> 2004 (White)               | 2001      | USA             | SR   | 21921   | ≥18    | LT | 2.50 (2.20 to 2.70) <sup>1</sup>   | NR                                   | NR                                   |
| Stern <i>et al.</i> 2004 (Black)               | 2001      | USA             | SR   | 2443    | ≥18    | LT | 1.30 (0.70 to 1.80) <sup>1</sup>   | NR                                   | NR                                   |
| Stern <i>et al.</i> 2004 (Other)               | 2001      | USA             | SR   | 2856    | ≥18    | LT | 1.00 (0.70 to 1.40) <sup>1</sup>   | NR                                   | NR                                   |
| Gelfand <i>et al.</i> 2005 (African Americans) | 2001      | USA             | SR   | 2443    | ≥18    | LT | 1.30 (0.70 to 1.80) <sup>1</sup>   | NR                                   | NR                                   |
| Gelfand <i>et al.</i> 2005 (Caucasian)         | 2001      | USA             | SR   | 21921   | ≥18    | LT | 2.50 (2.20 to 2.70) <sup>1</sup>   | NR                                   | NR                                   |
| Kurd <i>et al.</i> 2009                        | 2003-2004 | USA             | SR/D | 2984    | 20-59  | LT | 3.15 (2.18 to 4.53) <sup>1</sup>   | 3.18 (2.02 to 4.96) <sup>1</sup>     | 3.11 (1.99 to 4.83) <sup>1</sup>     |
| Wu <i>et al.</i> 2009                          | 2004      | USA             | SR   | 40730   | NR     | NR | 2.80 (2.61 to 2.93) <sup>2,3</sup> | NR                                   | NR                                   |

|                               |                         |                                               |      |         |       |    |                                    |                                    |                                    |
|-------------------------------|-------------------------|-----------------------------------------------|------|---------|-------|----|------------------------------------|------------------------------------|------------------------------------|
| Helmick <i>et al.</i> 2014    | 2003-2006;<br>2009-2010 | USA                                           | SR   | 10676   | 20-59 | LT | 3.10 (2.60 to 3.60) <sup>1,5</sup> | 3.00 (2.50 to 3.70) <sup>1,5</sup> | 3.10 (2.50 to 3.90) <sup>1,5</sup> |
| Rachakonda <i>et al.</i> 2014 | 2009-2010               | USA                                           | SR/D | 6216    | 20-59 | LT | 3.20 (2.60 to 3.70) <sup>1,5</sup> | 3.10 (2.10 to 3.40) <sup>1,5</sup> | 3.60 (2.70 to 4.50) <sup>1,5</sup> |
| Mendelson <i>et al.</i> 2017  | 2010-2012               | USA                                           | SR   | 197463  | ≥18   | LT | 2.62 (2.55 to 2.69) <sup>3,6</sup> | NR                                 | NR                                 |
| Cooksey <i>et al.</i> 2018    | 1999-2013               | Wales                                         | Ph   | 1223114 | ≥18   | PP | 2.01 (1.99 to 2.04) <sup>3,6</sup> | 1.04 (1.02 to 1.06) <sup>3,6</sup> | 0.99 (0.98 to 1.01) <sup>3,6</sup> |
| Lillie <i>et al.</i> 2012     | 2010                    | France                                        | Ph   | NR      | ≥15   | LT | 1.50 <sup>1,9</sup>                | NR                                 | NR                                 |
|                               |                         | Spain                                         |      |         |       |    | 0.40 <sup>1,9</sup>                | NR                                 | NR                                 |
| Lebwohl <i>et al.</i> 2014    | 2012                    | Canada                                        | SR   | NR      | ≥18   | LT | 3.30 <sup>1,9</sup>                | NR                                 | NR                                 |
|                               |                         | France                                        |      |         |       |    | 1.50 <sup>1,9</sup>                | NR                                 | NR                                 |
|                               |                         | Germany                                       |      |         |       |    | 1.70 <sup>1,9</sup>                | NR                                 | NR                                 |
|                               |                         | Italy                                         |      |         |       |    | 1.80 <sup>1,9</sup>                | NR                                 | NR                                 |
|                               |                         | Spain                                         |      |         |       |    | 1.40 <sup>1,9</sup>                | NR                                 | NR                                 |
|                               |                         | UK                                            |      |         |       |    | 2.00 <sup>1,9</sup>                | NR                                 | NR                                 |
|                               |                         | USA                                           |      |         |       |    | 2.20 <sup>1,9</sup>                | NR                                 | NR                                 |
| Augustin <i>et al.</i> 2017   | 2010, 2011,<br>2013     | France,<br>Germany,<br>Italy, Spain<br>and UK | SR   | 176768  | NR    | LT | 4.50 (4.40 to 4.59) <sup>2,3</sup> | NR                                 | NR                                 |
|                               |                         | France                                        |      |         |       |    | 5.50 <sup>1,9</sup>                | NR                                 | NR                                 |
|                               |                         | Germany                                       |      |         |       |    | 4.10 <sup>1,9</sup>                | NR                                 | NR                                 |
|                               |                         | Italy                                         |      |         |       |    | 4.50 <sup>1,9</sup>                | NR                                 | NR                                 |
|                               |                         | Spain                                         |      |         |       |    | 3.40 <sup>1,9</sup>                | NR                                 | NR                                 |
|                               |                         | UK                                            |      |         |       |    | 4.30 <sup>1,9</sup>                | NR                                 | NR                                 |

|                                                                                                                                                                                                                                                                                                                                                                                                                                                                                                                                                                                                                                                                                                                                                                                        |           |                                                   |       |       |       |    |                                    |                                    |                                    |
|----------------------------------------------------------------------------------------------------------------------------------------------------------------------------------------------------------------------------------------------------------------------------------------------------------------------------------------------------------------------------------------------------------------------------------------------------------------------------------------------------------------------------------------------------------------------------------------------------------------------------------------------------------------------------------------------------------------------------------------------------------------------------------------|-----------|---------------------------------------------------|-------|-------|-------|----|------------------------------------|------------------------------------|------------------------------------|
| Svensson <i>et al.</i> 2018                                                                                                                                                                                                                                                                                                                                                                                                                                                                                                                                                                                                                                                                                                                                                            | 2008-2011 | Germany, Italy, Portugal, Sweden, The Netherlands | SR/Ph | 11283 | 18-74 | LT | 5.20 (4.80 to 5.70) <sup>1,5</sup> | 5.10 (4.60 to 5.70) <sup>1</sup>   | 5.30 (4.70 to 6.00) <sup>1</sup>   |
|                                                                                                                                                                                                                                                                                                                                                                                                                                                                                                                                                                                                                                                                                                                                                                                        |           | Germany                                           |       | NR    |       |    | 6.90 (6.10 to 7.70) <sup>1,5</sup> | NR                                 | NR                                 |
|                                                                                                                                                                                                                                                                                                                                                                                                                                                                                                                                                                                                                                                                                                                                                                                        |           | Italy                                             |       | NR    |       |    | 2.60 (1.90 to 3.50) <sup>1,5</sup> | NR                                 | NR                                 |
|                                                                                                                                                                                                                                                                                                                                                                                                                                                                                                                                                                                                                                                                                                                                                                                        |           | The Netherlands                                   |       | NR    |       |    | 3.10 (2.20 to 4.10) <sup>1,5</sup> | NR                                 | NR                                 |
|                                                                                                                                                                                                                                                                                                                                                                                                                                                                                                                                                                                                                                                                                                                                                                                        |           | Portugal                                          |       | NR    |       |    | 1.50 (1.00 to 2.10) <sup>1,5</sup> | NR                                 | NR                                 |
|                                                                                                                                                                                                                                                                                                                                                                                                                                                                                                                                                                                                                                                                                                                                                                                        |           | Sweden                                            |       | NR    |       |    | 5.40 (4.50 to 6.50) <sup>1,5</sup> | NR                                 | NR                                 |
| Danielsen <i>et al.</i> 2019                                                                                                                                                                                                                                                                                                                                                                                                                                                                                                                                                                                                                                                                                                                                                           | 2015      | Denmark, Norway, Sweden                           | SR/Ph | 22050 | 18-74 | PT | 5.73 (5.43 to 6.04) <sup>2,3</sup> | 5.80 (5.53 to 6.42) <sup>2,3</sup> | 5.66 (5.07 to 5.92) <sup>2,3</sup> |
|                                                                                                                                                                                                                                                                                                                                                                                                                                                                                                                                                                                                                                                                                                                                                                                        |           | Denmark                                           |       | 8871  |       |    | 5.78 (5.30 to 6.27) <sup>2,3</sup> | 5.73 (5.07 to 6.39) <sup>2,3</sup> | 5.84 (5.12 to 6.56) <sup>2,3</sup> |
|                                                                                                                                                                                                                                                                                                                                                                                                                                                                                                                                                                                                                                                                                                                                                                                        |           | Norway                                            |       | 3398  |       |    | 6.77 (5.92 to 7.61) <sup>2,3</sup> | 6.15 (5.04 to 7.25) <sup>2,3</sup> | 7.47 (6.18 to 8.77) <sup>2,3</sup> |
|                                                                                                                                                                                                                                                                                                                                                                                                                                                                                                                                                                                                                                                                                                                                                                                        |           | Sweden                                            |       | 9781  |       |    | 5.33 (4.88 to 5.77) <sup>2,3</sup> | 5.72 (5.06 to 6.39) <sup>2,3</sup> | 4.97 (4.37 to 5.56) <sup>2,3</sup> |
| <p>Diagnostic methods: D = Dermatologists; Ph = Physician; SR = Self-reported diagnosis. Prevalence measure: PT = Point prevalence; PP = Period prevalence; LT = Lifetime prevalence. Notes: <sup>1</sup> Value reported from the study; <sup>2</sup> Rate checked and confirmed; <sup>3</sup> Confidence Interval (CI) estimated and added by the authors as it was not present in the original study; <sup>4</sup> Standardised rate; <sup>5</sup> Age and/or sex adjusted; <sup>6</sup> Rate calculated from number of cases provided from the paper; <sup>7</sup> Rate calculated from personal information given by the author(s) of the study; <sup>8</sup> Weighted percentage; <sup>9</sup> It was not possible to calculate CI due to lack of raw data. NR= Not Reported.</p> |           |                                                   |       |       |       |    |                                    |                                    |                                    |

**eTable 5: Studies reporting on the prevalence of psoriasis in the overall population**

| Study                              | Study time | Country | Diagnostic method | Population size | Age     | Type of rate | Prevalence rate % (95% CI)         | Prevalence rate % (95% CI) Female  | Prevalence rate % (95% CI) Male    |
|------------------------------------|------------|---------|-------------------|-----------------|---------|--------------|------------------------------------|------------------------------------|------------------------------------|
| Romiti <i>et al.</i> 2017          | 2015-2016  | Brazil  | SR                | 8947            | <30-60+ | LT           | 1.31 (1.10 to 1.51) <sup>1</sup>   | 1.15 (0.90 to 1.43) <sup>1</sup>   | 1.47 (1.11 to 1.82) <sup>1</sup>   |
| Henan Dermatoses Survey Group 1982 | 1980       | China   | NR                | 105545          | NR      | NR           | 0.37 (0.33 to 0.40) <sup>2,3</sup> | 0.31 <sup>1,9</sup>                | 0.43 <sup>1,9</sup>                |
| Li <i>et al.</i> 1982              | 1974-1981  | China   | NR                | 674245          | NR      | PT           | 0.32 (0.31 to 0.33) <sup>3,6</sup> | NR                                 | NR                                 |
| Yip <i>et al.</i> 1984             | 1974-1981  | China   | SR                | 674245          | NR      | PT           | 0.35 <sup>1,9</sup>                | NR                                 | NR                                 |
| Changgeng <i>et al.</i> 1987       | 1984       | China   | NR                | 5742062         | 0-70    | PP           | 0.12 <sup>1,4</sup>                | 0.12 <sup>1,4</sup>                | 0.17 <sup>1,4</sup>                |
| Zhanli <i>et al.</i> 1994          | 1984       | China   | NR                | 2572261         |         | PT           | 0.02 (0.02 to 0.02) <sup>2,3</sup> | NR                                 | NR                                 |
| Ding <i>et al.</i> 2012            | NR         | China   | D                 | 17345           | 0-70+   | PT           | 0.47 <sup>1,5</sup>                | 0.44 <sup>1,5</sup>                | 0.54 <sup>1,5</sup>                |
| Li <i>et al.</i> 2013              | 2008-2010  | China   | D                 | 30935           | 0-70+   | PT           | 0.14 <sup>1,4</sup>                | 0.08 <sup>1,4</sup>                | 0.19 <sup>1,4</sup>                |
| Lomholt <i>et al.</i> 1964         | 1948       | Denmark | D                 | 10984           | 0-100   | PT           | 2.84 (2.53 to 3.15) <sup>2,3</sup> | NR                                 | NR                                 |
| Egeberg <i>et al.</i> 2017         | 2003-2012  | Denmark | Ph                | 5569606         | 0-70+   | LT           | 2.26 (2.25 to 2.28) <sup>3,7</sup> | 2.37 (2.35 to 2.38) <sup>3,6</sup> | 2.07 (2.06 to 2.09) <sup>3,6</sup> |
| Abdel-Hafez <i>et al.</i> 2003     | 1994-1996  | Egypt   | D                 | 8008            | 0-60+   | PT           | 0.19 (0.09 to 0.28) <sup>2,3</sup> | NR                                 | NR                                 |
| Wolkenstein <i>et al.</i> 2003     | 2002       | France  | SR                | 18137           | 0-75+   | NR           | 3.58 <sup>1,5</sup>                | NR                                 | NR                                 |
| Schlender <i>et al.</i> 2008       | 2003       | Germany | D/Ph              | 2238000         | <20-80+ | PT           | 2.00 (1.98 to 2.02) <sup>1</sup>   | NR                                 | NR                                 |
| Schafer <i>et al.</i> 2009         | 2005       | Germany | NR                | 1344071         | NR      | LT           | 2.53 <sup>1,9</sup>                | 2.31 <sup>1,9</sup>                | 2.71 <sup>1,9</sup>                |

|                                |           |         |      |          |        |    |                                    |                                    |                                    |
|--------------------------------|-----------|---------|------|----------|--------|----|------------------------------------|------------------------------------|------------------------------------|
| Augustin <i>et al.</i> 2010    | 2005      | Germany | Ph   | 1344071  | NR     | LT | 2.53 (2.50 to 2.55) <sup>2,3</sup> | NR                                 | NR                                 |
| Augustin <i>et al.</i> 2010    | 2005      | Germany | Ph   | 1344071  | 0-95+  | LT | 2.53 (2.50 to 2.55) <sup>2,3</sup> | NR                                 | NR                                 |
| Augustin <i>et al.</i> 2011    | 2007      | Germany | Ph   | 1423308  | NR     | LT | 2.44 (2.41 to 2.47) <sup>2,3</sup> | 2.23 (2.19 to 2.27) <sup>2,3</sup> | 2.62 (2.58 to 2.66) <sup>2,3</sup> |
| Schafer <i>et al.</i> 2011     | 2005      | Germany | Ph   | 1344071  | 0-80+  | LT | 2.53 (2.50 to 2.55) <sup>1</sup>   | 2.31 (2.27 to 2.35) <sup>1</sup>   | 2.71 (2.67 to 2.74) <sup>1</sup>   |
| Augustin <i>et al.</i> 2013    | 2009      | Germany | D/Ph | 1642852  | NR     | LT | 2.36 (2.33 to 2.38) <sup>2,3</sup> | 2.20 (2.17 to 2.24) <sup>2,3</sup> | 2.50 (2.47 to 2.53) <sup>2,3</sup> |
| Matusiewicz <i>et al.</i> 2014 | 2007      | Germany | NR   | 6699125  | NR     | LT | 2.10 (2.10 to 2.10) <sup>1,5</sup> | NR                                 | NR                                 |
| Radtke <i>et al.</i> 2014      | NR        | Germany | NR   | 1349671  | NR     | LT | 2.78 (2.75 to 2.80) <sup>2,3</sup> | 2.59 <sup>1,9</sup>                | 2.94 <sup>1,9</sup>                |
| Jacob <i>et al.</i> 2016       | 2007-2010 | Germany | D/Ph | 2818157  | NR     | LT | 3.76 (3.74 to 3.79) <sup>2,3</sup> | NR                                 | NR                                 |
| Petersen <i>et al.</i> 2019    | 2010      | Germany | NR   | NR       | NR     | PT | 2.30 <sup>1,5</sup>                | NR                                 | NR                                 |
| Sewerin <i>et al.</i> 2019     | 2009      | Germany | NR   | 64637752 | NR     | PP | 2.20 (2.19 to 2.20) <sup>3,6</sup> | 2.13 <sup>1,9</sup>                | 2.22 <sup>1,9</sup>                |
|                                | 2010      |         |      | 63962071 |        |    | 2.25 (2.25 to 2.26) <sup>3,6</sup> | 2.18 <sup>1,9</sup>                | 2.26 <sup>1,9</sup>                |
|                                | 2011      |         |      | 64988016 |        |    | 2.27 (2.27 to 2.28) <sup>3,6</sup> | 2.19 <sup>1,9</sup>                | 2.27 <sup>1,9</sup>                |
|                                | 2012      |         |      | 65792296 |        |    | 2.30 (2.30 to 2.30) <sup>3,6</sup> | 2.21 <sup>1,9</sup>                | 2.29 <sup>1,9</sup>                |
| Grills <i>et al.</i> 2012      | 2010      | India   | D    | 1172     | 0-65+  | PT | 0.29 (0.01 to 0.68) <sup>2,3</sup> | NR                                 | NR                                 |
| Al-Rubiay <i>et al.</i> 2005   | NR        | Iraq    | NR   | 6666     | <5-65+ | PT | 0.53 (0.35 to 0.70) <sup>3,6</sup> | NR                                 | NR                                 |
| Ali <i>et al.</i> 2012         | 2010      | Iraq    | D    | 542      | 0-85   | PT | 0.60 (0.00 to 1.18) <sup>2,3</sup> | NR                                 | NR                                 |
| Shapiro <i>et al.</i> 2007     | 1997-2004 | Israel  | D/Ph | 1625132  | 0-121  | LT | 2.84 (2.81 to 2.86) <sup>3,6</sup> | 2.76 (2.72 to 2.79) <sup>3,6</sup> | 2.92 (2.88 to 2.95) <sup>3,6</sup> |
| Shalom <i>et al.</i> 2018      | 1998-2016 | Israel  | D    | NR       | NR     | PP | 2.69 <sup>1,9</sup>                | NR                                 | NR                                 |

|                              |           |                                              |      |           |       |    |                                    |                                    |                                    |    |    |
|------------------------------|-----------|----------------------------------------------|------|-----------|-------|----|------------------------------------|------------------------------------|------------------------------------|----|----|
| Schonmann <i>et al.</i> 2019 | 2011      | Israel                                       | D    | 4059758   | 0-85+ | PP | 2.53 (2.51 to 2.55) <sup>1,4</sup> | 2.41 (2.38 to 2.43) <sup>1,4</sup> | 2.65 (2.63 to 2.68) <sup>1,4</sup> |    |    |
|                              | 2012      |                                              |      | 4133410   |       |    | 2.76 (2.75 to 2.78) <sup>1,4</sup> | 2.64 (2.62 to 2.66) <sup>1,4</sup> | 2.89 (2.86 to 2.92) <sup>1,4</sup> |    |    |
|                              | 2013      |                                              |      | 4215118   |       |    | 3.00 (2.98 to 3.02) <sup>1,4</sup> | 2.87 (2.84 to 2.89) <sup>1,4</sup> | 3.13 (3.10 to 3.15) <sup>1,4</sup> |    |    |
|                              | 2014      |                                              |      | 4296843   |       |    | 3.21 (3.19 to 3.23) <sup>1,4</sup> | 3.08 (3.05 to 3.10) <sup>1,4</sup> | 3.35 (3.32 to 3.38) <sup>1,4</sup> |    |    |
|                              | 2015      |                                              |      | 4355775   |       |    | 3.43 (3.41 to 3.45) <sup>1,4</sup> | 3.29 (3.26 to 3.31) <sup>1,4</sup> | 3.58 (3.55 to 3.61) <sup>1,4</sup> |    |    |
|                              | 2016      |                                              |      | 4426534   |       |    | 3.65 (3.63 to 3.67) <sup>1,4</sup> | 3.50 (3.47 to 3.52) <sup>1,4</sup> | 3.80 (3.77 to 3.83) <sup>1,4</sup> |    |    |
|                              | 2017      |                                              |      | 4496240   |       |    | 3.85 (3.83 to 3.87) <sup>1,4</sup> | 3.69 (3.67 to 3.72) <sup>1,4</sup> | 4.00 (3.97 to 4.03) <sup>1,4</sup> |    |    |
| Saraceno <i>et al.</i> 2008  | 2006      | Italy                                        | SR   | 4109      | NR    | PT | 2.90 <sup>1,9</sup>                | NR                                 | NR                                 |    |    |
| Kubota <i>et al.</i> 2015    | 2010-2011 | Japan                                        | D/Ph | 128000000 | 0-80+ | PT | 0.34 (0.34 to 0.34) <sup>1</sup>   | NR                                 | NR                                 |    |    |
| Benchikhi <i>et al.</i> 2012 | NR        | Maghreb<br>(Morocco,<br>Algeria,<br>Tunisia) | D/Ph | NR        | NR    | PT | 0.23 (0.18 to 0.28) <sup>1</sup>   | NR                                 | NR                                 |    |    |
|                              |           | Algeria                                      |      |           |       |    | 0.36 (0.33 to 0.40) <sup>1</sup>   |                                    |                                    | NR | NR |
|                              |           | Morocco                                      |      |           |       |    | 0.11 (0.09 to 0.13) <sup>1</sup>   |                                    |                                    | NR | NR |
|                              |           | Tunisia                                      |      |           |       |    | 0.35 (0.32 to 0.38) <sup>1</sup>   |                                    |                                    | NR | NR |
| Walker <i>et al.</i> 2008    | NR        | Nepal                                        | D    | 878       | 0-80+ | PP | 0.24 (0.00 to 0.56) <sup>2,3</sup> | NR                                 | NR                                 |    |    |
| Braathenet <i>al.</i> 1989   | 1985      | Norway                                       | SR   | 10576     | 0-80+ | LT | 1.41 (1.18 to 1.63) <sup>2,3</sup> | 1.45 (1.13 to 1.77) <sup>2,3</sup> | 1.37 (1.05 to 1.68) <sup>2,3</sup> |    |    |
| Falk <i>et al.</i> 1993      | 1991      | Norway                                       | D/Ph | 2950      | 0-70+ | LT | 1.36 (0.94 to 1.77) <sup>3,6</sup> | 1.60 (0.95 to 2.25) <sup>3,6</sup> | 1.12 (0.59 to 1.66) <sup>3,6</sup> |    |    |

|                                     |           |                   |      |          |         |    |                                    |                                    |                                    |
|-------------------------------------|-----------|-------------------|------|----------|---------|----|------------------------------------|------------------------------------|------------------------------------|
| Falk <i>et al.</i> 1993<br>(Lapps)  | 1991      | Norway            | D/Ph | 2508     | 0-70+   | LT | 1.40 (0.94 to 1.85) <sup>2,3</sup> | 1.64 (0.93 to 2.35) <sup>2,3</sup> | 1.17 (0.58 to 1.75) <sup>2,3</sup> |
| Falk <i>et al.</i> 1993 (Non-Lapps) | 1991      | Norway            | D/Ph | 442      | 0-70+   | LT | 1.13 (0.15 to 2.12) <sup>2,3</sup> | 1.39 (0.00 to 2.95) <sup>2,3</sup> | 0.88 (0.00 to 2.11) <sup>2,3</sup> |
| Hegvik <i>et al.</i> 2017           | 2015      | Norway            | D/Ph | 2500118  | 4-48    | PP | 2.50 (2.48 to 2.52) <sup>3,6</sup> | 2.64 (2.61 to 2.68) <sup>3,6</sup> | 2.36 (2.33 to 2.39) <sup>3,6</sup> |
| Borzecki <i>et al.</i> 2012         | 2005-2009 | Poland            | D    | NR       | <20-60+ | PP | 1.45 <sup>1,9</sup>                | 1.46 <sup>1,9</sup>                | 1.43 <sup>1,9</sup>                |
| Borzecki <i>et al.</i> 2018         | 2008-2015 | Poland            | D    | 38378481 | <20-60+ | PP | 2.99 (2.98 to 2.99) <sup>2,3</sup> | 3.13 (3.13 to 3.14) <sup>2,3</sup> | 2.83 (2.83 to 2.84) <sup>2,3</sup> |
| Lee <i>et al.</i> 2017              | 2011      | Republic of Korea | NR   | 219429   | 0-80+   | PP | 0.44 <sup>1,4</sup>                | NR                                 | NR                                 |
|                                     | 2012      |                   |      | 221704   |         |    | 0.44 <sup>1,4</sup>                | NR                                 | NR                                 |
|                                     | 2013      |                   |      | 228842   |         |    | 0.45 <sup>1,4</sup>                | NR                                 | NR                                 |
|                                     | 2014      |                   |      | 231888   |         |    | 0.45 <sup>1,4</sup>                | NR                                 | NR                                 |
|                                     | 2015      |                   |      | 233909   |         |    | 0.45 <sup>1,4</sup>                | NR                                 | NR                                 |
| Han <i>et al.</i> 2018              | 2006-2015 | Republic of Korea | NR   | NR       | 0-90+   | PT | 0.54 <sup>1,9</sup>                | NR                                 | NR                                 |
|                                     | 2006      |                   |      | 48371311 |         |    | 0.47 (0.47 to 0.48) <sup>2,3</sup> | NR                                 | NR                                 |
|                                     | 2007      |                   |      | 48603519 |         |    | 0.48 (0.48 to 0.49) <sup>2,3</sup> | NR                                 | NR                                 |
|                                     | 2008      |                   |      | 49560378 |         |    | 0.50 (0.50 to 0.51) <sup>2,3</sup> | NR                                 | NR                                 |
|                                     | 2009      |                   |      | 49884458 |         |    | 0.53 (0.52 to 0.53) <sup>2,3</sup> | NR                                 | NR                                 |
|                                     | 2010      |                   |      | 50166793 |         |    | 0.54 (0.54 to 0.55) <sup>2,3</sup> | NR                                 | NR                                 |
|                                     | 2011      |                   |      | 50445164 |         |    | 0.55 (0.54 to 0.55) <sup>2,3</sup> | NR                                 | NR                                 |



|                                   |           |         |    |          |       |    |                                    |                                    |                                    |
|-----------------------------------|-----------|---------|----|----------|-------|----|------------------------------------|------------------------------------|------------------------------------|
|                                   | 2012      |         |    | 50763154 |       |    | 0.55 (0.55 to 0.56) <sup>2,3</sup> | NR                                 | NR                                 |
|                                   | 2013      |         |    | 51013675 |       |    | 0.58 (0.58 to 0.58) <sup>2,3</sup> | NR                                 | NR                                 |
|                                   | 2014      |         |    | 51281917 |       |    | 0.59 (0.59 to 0.59) <sup>2,3</sup> | NR                                 | NR                                 |
|                                   | 2015      |         |    | 51574044 |       |    | 0.61 (0.61 to 0.62) <sup>2,3</sup> | NR                                 | NR                                 |
| Boca <i>et al.</i> 2019           | NR        | Romania | Ph | 2240     | 2-92  | PT | 5.18 (4.26 to 6.10) <sup>2,3</sup> | 4.82 (3.64 to 6.00) <sup>3,6</sup> | 5.54 (4.10 to 6.97) <sup>3,6</sup> |
| Osmanova <i>et al.</i> 1985       | 1958-1978 | Russia  | Ph | 29260    | 0-60+ | NR | 0.72 (0.70 to 0.74) <sup>1</sup>   | NR                                 | NR                                 |
| Znamenskaya <i>et al.</i><br>2012 | 2009      | Russia  | Ph | NR       | 0-18+ | PP | 0.21 <sup>1,9</sup>                | NR                                 | NR                                 |
|                                   | 2010      |         |    |          |       |    | 0.22 <sup>1,9</sup>                | NR                                 | NR                                 |
|                                   | 2011      |         |    |          |       |    | 0.22 <sup>1,9</sup>                | NR                                 | NR                                 |
| Kubanov <i>et al.</i> 2017        | 2010      | Russia  | Ph | NR       | 0-18+ | PP | 0.22 <sup>1,9</sup>                | NR                                 | NR                                 |
|                                   | 2011      |         |    |          |       |    | 0.22 <sup>1,9</sup>                | NR                                 | NR                                 |
|                                   | 2012      |         |    |          |       |    | 0.22 <sup>1,9</sup>                | NR                                 | NR                                 |
|                                   | 2013      |         |    |          |       |    | 0.22 <sup>1,9</sup>                | NR                                 | NR                                 |
|                                   | 2014      |         |    |          |       |    | 0.22 <sup>1,9</sup>                | NR                                 | NR                                 |
|                                   | 2015      |         |    |          |       |    | 0.23 <sup>1,9</sup>                | NR                                 | NR                                 |
|                                   | 2016      |         |    |          |       |    | 0.23 <sup>1,9</sup>                | NR                                 | NR                                 |
| Odinets <i>et al.</i> (2017)      | 2010      | Russia  | Ph | NR       | 0-18+ | PP | 0.13 <sup>1,9</sup>                | NR                                 | NR                                 |
|                                   | 2011      |         |    |          |       |    | 0.16 <sup>1,9</sup>                | NR                                 | NR                                 |

|                                                |           |           |      |         |         |    |                                    |                                    |                                    |
|------------------------------------------------|-----------|-----------|------|---------|---------|----|------------------------------------|------------------------------------|------------------------------------|
|                                                | 2012      |           |      |         |         |    | 0.17 <sup>1,9</sup>                | NR                                 | NR                                 |
|                                                | 2013      |           |      |         |         |    | 0.18 <sup>1,9</sup>                | NR                                 | NR                                 |
|                                                | 2014      |           |      |         |         |    | 0.17 <sup>1,9</sup>                | NR                                 | NR                                 |
|                                                | 2015      |           |      |         |         |    | 0.17 <sup>1,9</sup>                | NR                                 | NR                                 |
|                                                | 2016      |           |      |         |         |    | 0.18 <sup>1,9</sup>                | NR                                 | NR                                 |
| Campion <i>et al.</i> 1983                     | NR        | Scotland  | Ph   | 150300  | NR      | NR | 0.49 (0.46 to 0.53) <sup>2,3</sup> | NR                                 | NR                                 |
| Simpson <i>et al.</i> 2002                     | 1998-1999 | Scotland  | Ph   | 252538  | 0-80+   | PP | 0.73 (0.69 to 0.76) <sup>2,3</sup> | 0.75 (0.71 to 0.80) <sup>3,7</sup> | 0.70 (0.65 to 0.75) <sup>3,7</sup> |
| McHattie <i>et al.</i> 2012                    | NR        | Scotland  | Ph   | NR      | NR      | NR | 2.40 <sup>1,9</sup>                | NR                                 | NR                                 |
| Ferrandiz <i>et al.</i> 2001                   | 1998      | Spain     | SR   | 12938   | 0-70+   | LT | 1.43 (1.23 to 1.63) <sup>2,3</sup> | 1.40 (1.12 to 1.69) <sup>2,3</sup> | 1.46 (1.16 to 1.75) <sup>2,3</sup> |
| Fernandez-Sueiro <i>et al.</i> 2012            | NR        | Spain     | D/Ph | 36610   | NR      | NR | 1.20 (1.10 to 1.30) <sup>1</sup>   | NR                                 | NR                                 |
| Ferrandiz <i>et al.</i> 2014                   | 2012-2013 | Spain     | SR   | 12711   | <16-70+ | LT | 2.30 (2.00 to 2.60) <sup>1</sup>   | 1.90 (1.50 to 2.30) <sup>1</sup>   | 2.70 (2.20 to 3.20) <sup>1</sup>   |
| Siso-Almirall <i>et al.</i> 2018               | 2016      | Spain     | NR   | 7483761 | NR      | LT | 0.28 (0.28 to 0.29) <sup>1</sup>   | NR                                 | NR                                 |
| Fernandez-Armenteros <i>et al.</i> 2019        | 2003-2016 | Spain     | D/Ph | 398701  | 0-90+   | PP | 1.72 (1.68 to 1.76) <sup>2,3</sup> | 1.56 (1.51 to 1.61) <sup>2,3</sup> | 1.88 (1.82 to 1.94) <sup>2,3</sup> |
| Perera <i>et al.</i> 2000                      | 1997      | Sri-Lanka | D    | 1772    | 0-65+   | PT | 0.44 (0.14 to 0.76) <sup>2,3</sup> | NR                                 | NR                                 |
| Hellgren <i>et al.</i> 1967                    | 1961-1963 | Sweden    | D/Ph | 38670   | ≥7      | PP | 2.00 (1.83 to 2.11) <sup>2,3</sup> | 1.50 <sup>1,9</sup>                | 2.30 <sup>1,9</sup>                |
| Lofvendahl <i>et al.</i> 2014 (pre-validation) | 2005-2010 | Sweden    | Ph   | 1055766 | NR      | NR | 1.53 (1.51 to 1.56) <sup>2,3</sup> | 1.54 (1.50 to 1.57) <sup>1</sup>   | 1.53 (1.49 to 1.56) <sup>1</sup>   |

|                                                    |           |                                    |      |          |         |    |                                    |                                  |                                  |
|----------------------------------------------------|-----------|------------------------------------|------|----------|---------|----|------------------------------------|----------------------------------|----------------------------------|
| Lofvendahl <i>et al.</i> 2014<br>(post-validation) | 2005-2010 | Sweden                             | Ph   | 1055766  | NR      | PP | 1.23 (1.21 to 1.25) <sup>2,3</sup> | 1.23 (1.20 to 1.26) <sup>1</sup> | 1.22 (1.19 to 1.25) <sup>1</sup> |
| Chang <i>et al.</i> 2009                           | 2000-2006 | Taiwan                             | D    | 1000000  | 0-70+   | PP | 0.19 <sup>1</sup>                  | 0.16 <sup>1</sup>                | 0.23 <sup>1</sup>                |
| Tsai <i>et al.</i> 2011                            | 2006      | Taiwan                             | D/Ph | 23000000 | 0-70+   | PT | 0.24 (0.23 to 0.24) <sup>2,3</sup> | 0.18 <sup>1,9</sup>              | 0.29 <sup>1,9</sup>              |
| Chiang <i>et al.</i> 2012                          | 2004-2005 | Taiwan                             | D/Ph | 1000000  | ≤30-70+ | PP | 0.22 (0.21 to 0.23) <sup>3,6</sup> |                                  |                                  |
| Wang <i>et al.</i> 2016                            | 2003      | Taiwan                             | D    | 22604550 | NR      | PT | 0.16 (0.15 to 0.16) <sup>2,3</sup> | NR                               | NR                               |
|                                                    | 2004      |                                    |      | 22689122 |         |    | 0.18 (0.18 to 0.18) <sup>2,3</sup> | NR                               | NR                               |
|                                                    | 2005      |                                    |      | 22770383 |         |    | 0.18 (0.18 to 0.18) <sup>2,3</sup> | NR                               | NR                               |
|                                                    | 2006      |                                    |      | 22876527 |         |    | 0.19 (0.18 to 0.19) <sup>2,3</sup> | NR                               | NR                               |
|                                                    | 2007      |                                    |      | 22958360 |         |    | 0.19 (0.19 to 0.19) <sup>2,3</sup> | NR                               | NR                               |
|                                                    | 2008      |                                    |      | 23037031 |         |    | 0.19 (0.19 to 0.19) <sup>2,3</sup> | NR                               | NR                               |
|                                                    | 2009      |                                    |      | 23119772 |         |    | 0.20 (0.20 to 0.20) <sup>2,3</sup> | NR                               | NR                               |
|                                                    | 2010      |                                    |      | 23162123 |         |    | 0.20 (0.20 to 0.20) <sup>2,3</sup> | NR                               | NR                               |
|                                                    | 2011      |                                    |      | 23224912 |         |    | 0.21 (0.21 to 0.21) <sup>2,3</sup> | NR                               | NR                               |
|                                                    | 2012      |                                    |      | 23315822 |         |    | 0.22 (0.22 to 0.22) <sup>2,3</sup> | NR                               | NR                               |
| 2013                                               | 23373517  | 0.22 (0.22 to 0.22) <sup>2,3</sup> | NR   | NR       |         |    |                                    |                                  |                                  |
| Gibbs <i>et al.</i> 1996                           | 1994      | Tanzania                           | D/Ph | 1114     | NR      | PT | 0.10 (0.00 to 0.27) <sup>2,3</sup> | NR                               | NR                               |
| El Fekih <i>et al.</i> 2007                        | NR        | Tunisia                            | D    | 5778     | 0-60+   | PT | 0.57 <sup>1,9</sup>                | NR                               | NR                               |

|                               |           |                                    |                                    |                                    |       |    |                                    |                                    |                                    |
|-------------------------------|-----------|------------------------------------|------------------------------------|------------------------------------|-------|----|------------------------------------|------------------------------------|------------------------------------|
| Dowlatsahi <i>et al.</i> 2017 | 2002-2012 | The Netherlands                    | Ph                                 | 2000000                            | NR    | PP | 1.58 (1.56 to 1.59) <sup>3,6</sup> | NR                                 | NR                                 |
| Cakir <i>et al.</i> 2012      | NR        | Turkey                             | D                                  | 17835                              | 0-90  | PT | 0.44 (0.43 to 0.45) <sup>1,5</sup> | 0.41 (0.40 to 0.42) <sup>1,5</sup> | 0.47 (0.46 to 0.49) <sup>1,5</sup> |
| Serdaroğlu <i>et al.</i> 2012 | NR        | Turkey                             | D                                  | 8502                               | NR    | PT | 0.50 (0.35 to 0.66) <sup>2,3</sup> | 0.50 (0.29 to 0.71) <sup>3,6</sup> | 0.54 (0.32 to 0.76) <sup>3,6</sup> |
| Nevitt <i>et al.</i> 1996     | NR        | UK                                 | SR/Ph                              | 5395                               | 0-100 | PT | 1.48 (1.20 to 1.80) <sup>1</sup>   | NR                                 | NR                                 |
| Gelfand <i>et al.</i> 2005    | 1987-2002 | UK                                 | Ph                                 | 7533475                            | 0-90+ | LT | 1.52 (1.51 to 1.53) <sup>1</sup>   | 1.52 (1.50 to 1.53) <sup>1</sup>   | 1.53 (1.51 to 1.54) <sup>1</sup>   |
| Gillard <i>et al.</i> 2005    | 2002-2003 | UK                                 | Ph                                 | 789335                             | 0-65+ | PP | 0.78 (0.76 to 0.79) <sup>2,3</sup> | NR                                 | NR                                 |
| Seminara <i>et al.</i> 2011   | NR        | UK                                 | Ph                                 | 7520293                            | 0-90+ | PP | 1.87 (1.86 to 1.88) <sup>2,3</sup> | 1.87 (1.86 to 1.89) <sup>2,3</sup> | 1.86 (1.85 to 1.88) <sup>2,3</sup> |
| Springate <i>et al.</i> 2017  | 1999      | UK                                 | Ph                                 | 2674645                            | 0-100 | PP | 2.30 (2.28 to 2.32) <sup>1,5</sup> | 2.32 (2.29 to 2.34) <sup>1,5</sup> | 2.28 (2.26 to 2.31) <sup>1,5</sup> |
|                               | 2000      |                                    |                                    | 3301115                            |       |    | 2.27 (2.25 to 2.28) <sup>1,5</sup> | 2.29 (2.26 to 2.31) <sup>1,5</sup> | 2.25 (2.23 to 2.28) <sup>1,5</sup> |
|                               | 2001      |                                    |                                    | 3818715                            |       |    | 2.26 (2.25 to 2.28) <sup>1,5</sup> | 2.27 (2.25 to 2.29) <sup>1,5</sup> | 2.26 (2.24 to 2.28) <sup>1,5</sup> |
|                               | 2002      |                                    |                                    | 4252621                            |       |    | 2.30 (2.29 to 2.32) <sup>1,5</sup> | 2.32 (2.30 to 2.34) <sup>1,5</sup> | 2.29 (2.27 to 2.31) <sup>1,5</sup> |
|                               | 2003      |                                    |                                    | 4627496                            |       |    | 2.35 (2.34 to 2.36) <sup>1,5</sup> | 2.37 (2.35 to 2.39) <sup>1,5</sup> | 2.34 (2.32 to 2.36) <sup>1,5</sup> |
|                               | 2004      |                                    |                                    | 4802311                            |       |    | 2.43 (2.41 to 2.44) <sup>1,5</sup> | 2.44 (2.42 to 2.46) <sup>1,5</sup> | 2.42 (2.40 to 2.44) <sup>1,5</sup> |
|                               | 2005      |                                    |                                    | 5046387                            |       |    | 2.50 (2.48 to 2.51) <sup>1,5</sup> | 2.51 (2.49 to 2.53) <sup>1,5</sup> | 2.48 (2.46 to 2.50) <sup>1,5</sup> |
|                               | 2006      |                                    |                                    | 5142674                            |       |    | 2.55 (2.53 to 2.56) <sup>1,5</sup> | 2.57 (2.55 to 2.58) <sup>1,5</sup> | 2.53 (2.51 to 2.55) <sup>1,5</sup> |
|                               | 2007      |                                    |                                    | 5205217                            |       |    | 2.60 (2.59 to 2.61) <sup>1,5</sup> | 2.62 (2.60 to 2.64) <sup>1,5</sup> | 2.58 (2.56 to 2.60) <sup>1,5</sup> |
|                               | 2008      |                                    |                                    | 5340144                            |       |    | 2.65 (2.64 to 2.66) <sup>1,5</sup> | 2.67 (2.65 to 2.69) <sup>1,5</sup> | 2.63 (2.61 to 2.65) <sup>1,5</sup> |
| 2009                          | 5371557   | 2.70 (2.68 to 2.71) <sup>1,5</sup> | 2.71 (2.69 to 2.73) <sup>1,5</sup> | 2.68 (2.66 to 2.70) <sup>1,5</sup> |       |    |                                    |                                    |                                    |

|                                                                                                                                                                                                                                                                                                                                                                                                                                                                                                                                                                                                                                                                                                                                                                                         |           |            |    |         |         |    |                                    |                                    |                                    |
|-----------------------------------------------------------------------------------------------------------------------------------------------------------------------------------------------------------------------------------------------------------------------------------------------------------------------------------------------------------------------------------------------------------------------------------------------------------------------------------------------------------------------------------------------------------------------------------------------------------------------------------------------------------------------------------------------------------------------------------------------------------------------------------------|-----------|------------|----|---------|---------|----|------------------------------------|------------------------------------|------------------------------------|
|                                                                                                                                                                                                                                                                                                                                                                                                                                                                                                                                                                                                                                                                                                                                                                                         | 2010      |            |    | 5275862 |         |    | 2.74 (2.73 to 2.76) <sup>1,5</sup> | 2.76 (2.74 to 2.78) <sup>1,5</sup> | 2.73 (2.71 to 2.75) <sup>1,5</sup> |
|                                                                                                                                                                                                                                                                                                                                                                                                                                                                                                                                                                                                                                                                                                                                                                                         | 2011      |            |    | 5250139 |         |    | 2.77 (2.75 to 2.78) <sup>1,5</sup> | 2.79 (2.77 to 2.81) <sup>1,5</sup> | 2.76 (2.74 to 2.78) <sup>1,5</sup> |
|                                                                                                                                                                                                                                                                                                                                                                                                                                                                                                                                                                                                                                                                                                                                                                                         | 2012      |            |    | 5212122 |         |    | 2.78 (2.77 to 2.80) <sup>1,5</sup> | 2.80 (2.78 to 2.82) <sup>1,5</sup> | 2.77 (2.75 to 2.79) <sup>1,5</sup> |
|                                                                                                                                                                                                                                                                                                                                                                                                                                                                                                                                                                                                                                                                                                                                                                                         | 2013      |            |    | 4811019 |         |    | 2.82 (2.80 to 2.83) <sup>1,5</sup> | 2.83 (2.81 to 2.85) <sup>1,5</sup> | 2.81 (2.79 to 2.83) <sup>1,5</sup> |
| Johnson <i>et al.</i> 1978                                                                                                                                                                                                                                                                                                                                                                                                                                                                                                                                                                                                                                                                                                                                                              | 1971-1974 | USA        | D  | 20749   | 1-74    | PT | 1.43 <sup>1,9</sup>                | NR                                 | NR                                 |
| Koo <i>et al.</i> 1996                                                                                                                                                                                                                                                                                                                                                                                                                                                                                                                                                                                                                                                                                                                                                                  | 1991-1993 | USA        | SR | 33411   | <18-65+ | LT | 2.60 <sup>1,9</sup>                | NR                                 | NR                                 |
| Javitz <i>et al.</i> 2002                                                                                                                                                                                                                                                                                                                                                                                                                                                                                                                                                                                                                                                                                                                                                               | 1993-1995 | USA        | Ph | 407847  | 2-74    | PP | 0.70 (0.68 to 0.73) <sup>2,3</sup> | 0.69 (0.65 to 0.73) <sup>2,3</sup> | 0.72 (0.68 to 0.75) <sup>2,3</sup> |
| Arzensek <i>et al.</i> 1984                                                                                                                                                                                                                                                                                                                                                                                                                                                                                                                                                                                                                                                                                                                                                             | 1979-1981 | Yugoslavia | D  | 190     | NR      | PT | 1.58 (0.00 to 3.35) <sup>2,3</sup> | NR                                 | NR                                 |
| <p>Diagnostic methods: D = Dermatologists; Ph = Physician; SR = Self-reported diagnosis. Prevalence measure: PT = Point prevalence; PP = Period prevalence; LT = Lifetime prevalence. Notes: <sup>1</sup> Value reported from the study; <sup>2</sup> Rate checked and confirmed; <sup>3</sup> Confidence Interval (CI) estimated and added by the authors as it was not present in the original study; <sup>4</sup> Standardised rate; <sup>5</sup> Age and/or sex adjusted; <sup>6</sup> Rate calculated from number of cases provided from the paper; <sup>7</sup> Rate calculated from personal information given by the author(s) of the study; <sup>8</sup> Weighted percentage; <sup>9</sup> It was not possible to calculate CI due to lack of raw data. NR = Not Reported.</p> |           |            |    |         |         |    |                                    |                                    |                                    |

**eFigure 1. PRISMA Flow Diagram\* detailing the stages of the systematic review and numbers of records included or excluded.**

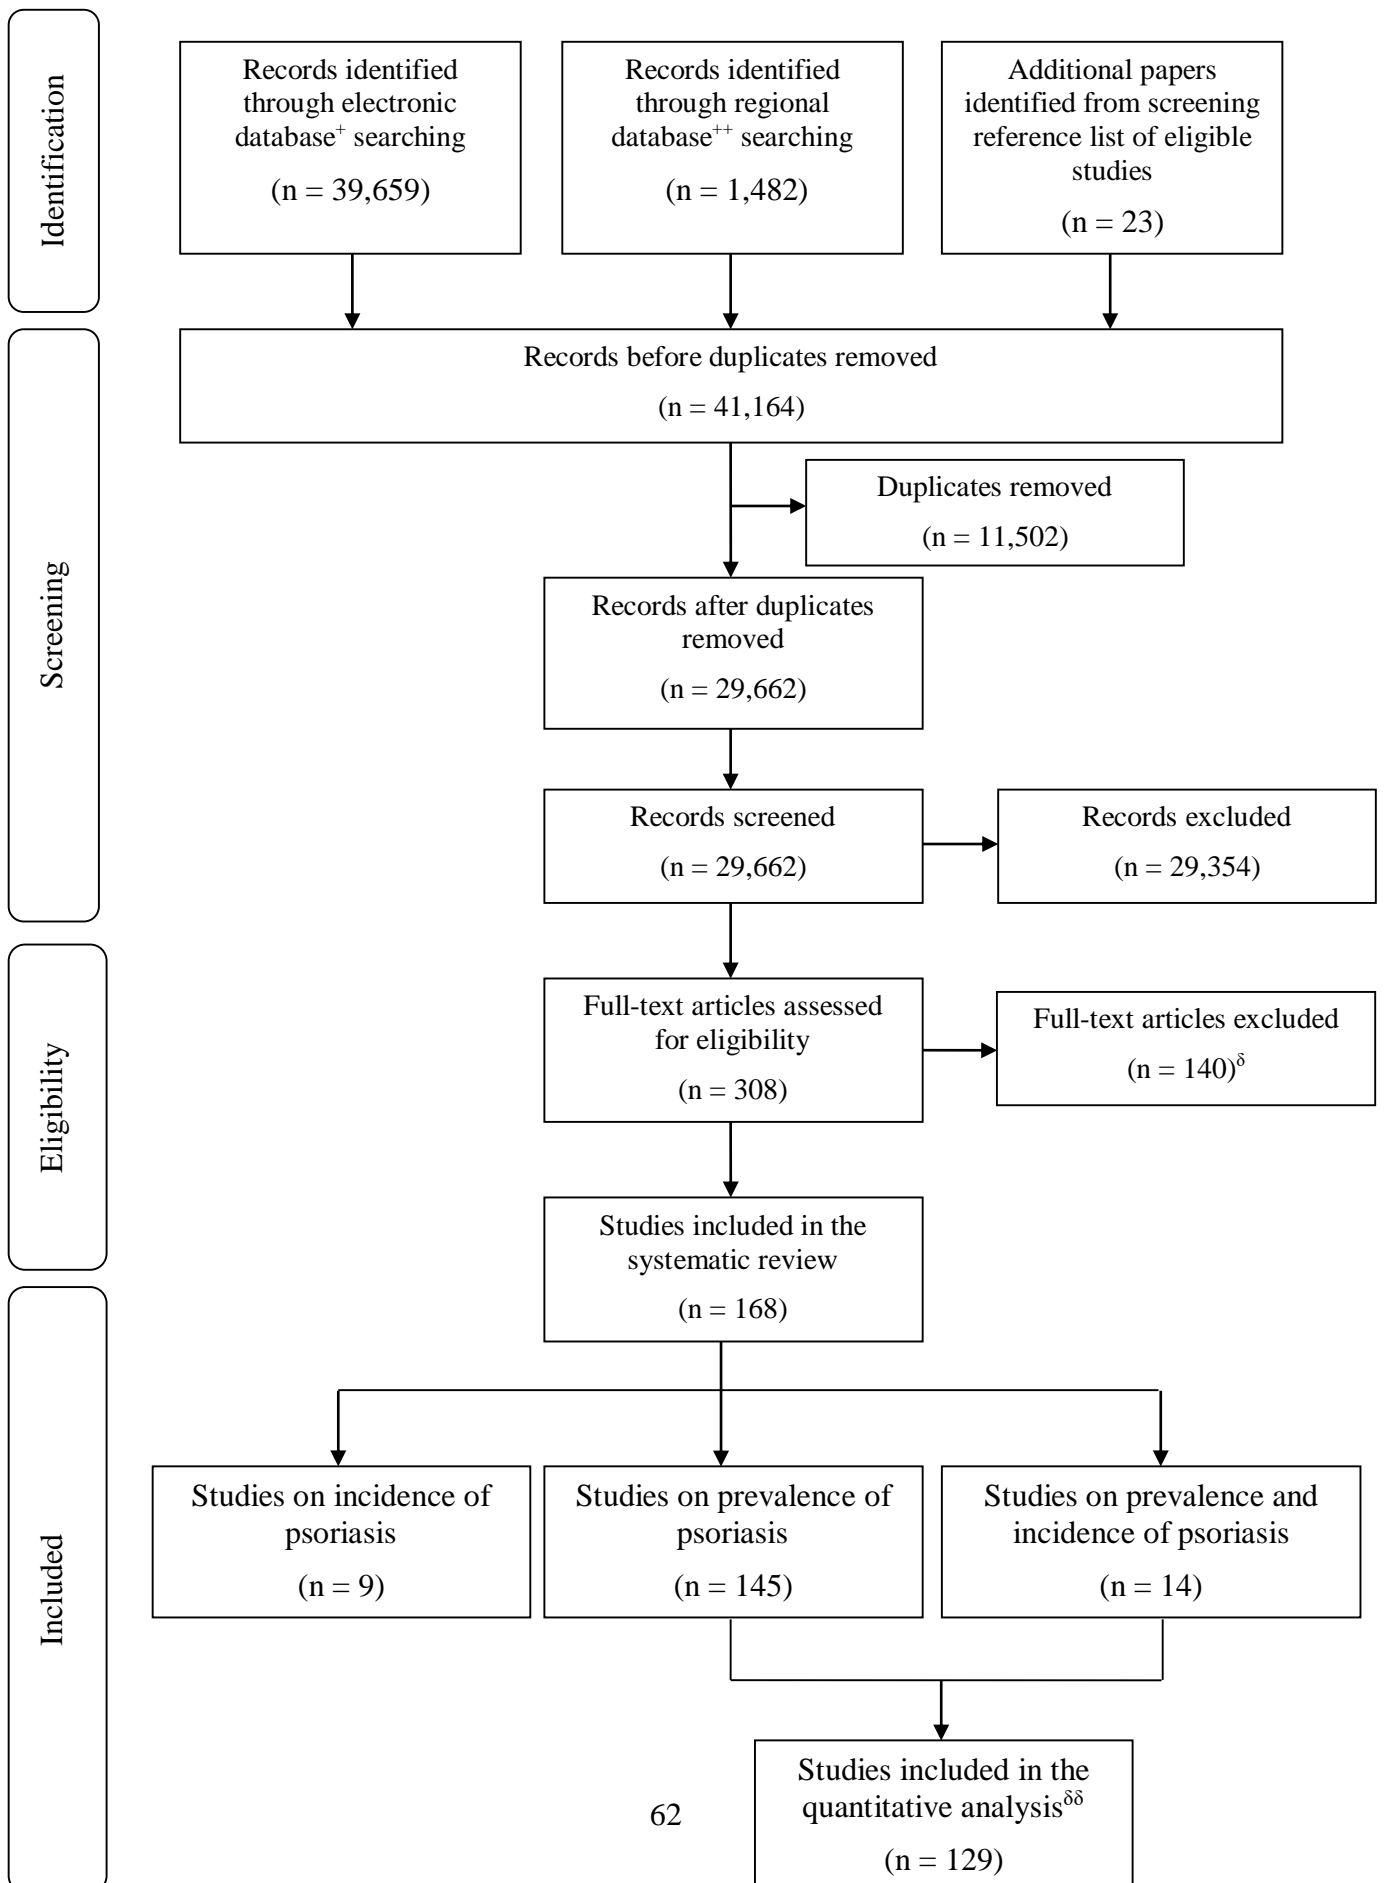

\* Moher D, Liberati A, Tetzlaff J, Altman DG, The PRISMA Group (2009). *Preferred Reporting Items for Systematic Reviews and Meta-Analyses: The PRISMA Statement*. PLoS Med 6(7): e1000097. doi:10.1371/journal.pmed1000097. <sup>δ</sup> Reasons for exclusion included: i) The studies not carried out on the general population (i.e. patients were identified from specific populations such as dermatology clinics, hospital admission/visits or specific subgroups of the population). ii) The studies not providing sufficient information to calculate prevalence and/or incidence rates for psoriasis. iii) The studies only focused on psoriatic arthritis. <sup>δδ</sup> Studies included in the statistical analyses were studies that reported on prevalence of psoriasis from a single data point (i.e. unique data sources).

## References

1. Downes MJ, Brennan ML, Williams HC, et al. Development of a critical appraisal tool to assess the quality of cross-sectional studies (AXIS). *BMJ Open* 2016;6(12):e011458. doi: 10.1136/bmjopen-2016-011458
