# Supplementary material for: National, regional, and worldwide epidemiology of psoriasis: systematic analysis and modelling study
Source: PubMed Central journal article supplement — BMJ. 2020 May 28;369:m1590. doi: 10.1136/bmj.m1590 (PMC7254147; doi:10.1136/bmj.m1590), 2020-05-28
Supplement: parr052230.ww3.pdf [file parr052230.ww3.pdf]

| eTable 14 Quality assessment of studies reporting on the incidence and prevalence of psoriasis using the AXIS tool |     |         |         |     |         |         |         |         |         |     |     |     |         |         |         |         |         |         |         |         |              |
|--------------------------------------------------------------------------------------------------------------------|-----|---------|---------|-----|---------|---------|---------|---------|---------|-----|-----|-----|---------|---------|---------|---------|---------|---------|---------|---------|--------------|
| Study                                                                                                              | Q1  | Q2      | Q3      | Q4  | Q5      | Q6      | Q7      | Q8      | Q9      | Q10 | Q11 | Q12 | Q13     | Q14     | Q15     | Q16     | Q17     | Q18     | Q19     | Q20     | Overall risk |
| Kilkenny et al., 1998                                                                                              | Yes | Yes     | Yes     | Yes | Yes     | Yes     | Yes     | Yes     | Yes     | Yes | Yes | Yes | No      | No      | Yes     | Yes     | Yes     | Yes     | No      | Yes     | Medium       |
| Plunkett et al., 1999                                                                                              | Yes | Yes     | Yes     | Yes | Yes     | Yes     | Yes     | Yes     | Yes     | Yes | Yes | Yes | No      | Yes     | Yes     | Yes     | Yes     | Yes     | No      | Yes     | Low          |
| Quirk et al., 1979                                                                                                 | No  | Unclear | No      | Yes | Unclear | Unclear | Unclear | Unclear | Unclear | No  | No  | No  | Unclear | No      | No      | No      | No      | No      | Unclear | Unclear | High         |
| Fujii et al., 2012                                                                                                 | Yes | Yes     | No      | Yes | Yes     | Yes     | Unclear | Yes     | Yes     | No  | No  | Yes | Unclear | No      | No      | Yes     | No      | No      | Unclear | Unclear | High         |
| Ferreira et al., 2014                                                                                              | Yes | Yes     | No      | Yes | Yes     | Yes     | Unclear | Yes     | Yes     | No  | No  | Yes | Unclear | No      | Yes     | Yes     | No      | No      | Unclear | Unclear | High         |
| Romiti et al., 2017                                                                                                | Yes | Yes     | No      | Yes | Yes     | Yes     | No      | Yes     | No      | Yes | No  | No  | Unclear | No      | Unclear | Yes     | Yes     | No      | No      | Unclear | Medium       |
| Bechelli et al., 1981                                                                                              | Yes | Yes     | No      | Yes | Yes     | Yes     | Yes     | Yes     | Unclear | No  | No  | Yes | No      | No      | Yes     | Yes     | Yes     | No      | No      | Yes     | Medium       |
| DiBonaventura et al., 2018                                                                                         | Yes | Yes     | No      | Yes | Yes     | Yes     | Unclear | Yes     | Yes     | Yes | Yes | Yes | Unclear | No      | Yes     | Yes     | Yes     | Yes     | No      | Unclear | Medium       |
| Solomon et al., 2010                                                                                               | Yes | Yes     | Yes     | Yes | Yes     | Yes     | N/A     | Yes     | Yes     | Yes | Yes | Yes | N/A     | N/A     | Yes     | Yes     | Yes     | Yes     | No      | Yes     | Low          |
| Gregory et al., 2014                                                                                               | Yes | Yes     | N/A     | Yes | Yes     | Yes     | N/A     | Yes     | Yes     | No  | No  | Yes | N/A     | N/A     | Yes     | Yes     | No      | No      | Unclear | Unclear | Medium       |
| Petrella et al., 2014                                                                                              | Yes | Yes     | N/A     | Yes | Yes     | Yes     | N/A     | Yes     | Yes     | No  | No  | Yes | N/A     | N/A     | Yes     | Yes     | Yes     | No      | Unclear | Unclear | Medium       |
| Eder et al., 2017                                                                                                  | Yes | Yes     | N/A     | Yes | Yes     | Yes     | N/A     | Yes     | Yes     | No  | No  | Yes | N/A     | N/A     | Yes     | Yes     | Yes     | No      | Unclear | Unclear | Medium       |
| Eder et al., 2017                                                                                                  | Yes | Yes     | N/A     | Yes | Yes     | Yes     | N/A     | Yes     | Yes     | No  | No  | Yes | N/A     | N/A     | Yes     | Yes     | Yes     | No      | Unclear | Unclear | Medium       |
| Eder et al., 2019                                                                                                  | Yes | Yes     | N/A     | Yes | Yes     | Yes     | N/A     | Yes     | Yes     | Yes | Yes | Yes | N/A     | N/A     | Yes     | Yes     | Yes     | Yes     | No      | Unclear | Low          |
| Henan Dermatoses Survey Group, 1982                                                                                | Yes | Yes     | Unclear | Yes | Yes     | Unclear | Unclear | Unclear | Unclear | No  | No  | Yes | Unclear | Unclear | Yes     | Unclear | Unclear | Unclear | Unclear | Unclear | Medium       |
| Li et al., 1982                                                                                                    | Yes | N/A     | N/A     | Yes | N/A     | N/A     | N/A     | N/A     | N/A     | No  | N/A | Yes | N/A     | N/A     | Yes     | N/A     | N/A     | No      | No      | Unclear | High         |
| Yip et al., 1984                                                                                                   | Yes | Yes     | No      | Yes | Yes     | Yes     | Unclear | Unclear | Unclear | No  | No  | No  | Unclear | No      | Unclear | Yes     | Yes     | No      | No      | Unclear | High         |
| Changgeng et al., 1987                                                                                             | Yes | Yes     | No      | Yes | Yes     | Yes     | No      | Yes     | Yes     | No  | No  | Yes | No      | No      | Yes     | Yes     | Yes     | No      | No      | Unclear | Low          |
| Tang Zhanli et al., 1994                                                                                           | Yes | Yes     | No      | Yes | Yes     | Unclear | Unclear | Yes     | Unclear | No  | No  | Yes | No      | No      | Yes     | Yes     | Unclear | Unclear | No      | Unclear | Medium       |
| Ding et al., 2012                                                                                                  | Yes | Yes     | Yes     | Yes | Yes     | Yes     | Unclear | Yes     | Yes     | No  | Yes | Yes | No      | No      | Yes     | Yes     | Yes     | No      | No      | Unclear | Low          |
| Li et al., 2012                                                                                                    | Yes | Yes     | Yes     | Yes | Yes     | Yes     | Yes     | Yes     | Yes     | Yes | Yes | Yes | No      | No      | Yes     | Yes     | Yes     | No      | No      | Yes     | Low          |
| Ren-li et al., 2012                                                                                                | Yes | Yes     | No      | Yes | Yes     | Yes     | Unclear | Yes     | Yes     | No  | No  | Yes | Unclear | No      | Yes     | Yes     | Unclear | Unclear | No      | Unclear | Low          |
| Li et al., 2013                                                                                                    | Yes | Yes     | No      | Yes | Yes     | Yes     | Unclear | Yes     | Yes     | No  | No  | Yes | No      | No      | Yes     | Yes     | Unclear | Unclear | No      | Yes     | Low          |
| Barisic-Drusko et al., 1989                                                                                        | Yes | Yes     | No      | Yes | Yes     | Yes     | No      | Yes     | Yes     | No  | No  | No  | Unclear | No      | Unclear | Yes     | No      | No      | No      | Unclear | High         |
| Lomholt et al., 1964                                                                                               | Yes | Yes     | No      | Yes | Yes     | Yes     | No      | No      | No      | No  | Yes | Yes | No      | No      | Yes     | Yes     | Yes     | Yes     | No      | No      | Medium       |
| Brandrup et al., 1981                                                                                              | Yes | Yes     | No      | Yes | Yes     | Yes     | No      | Yes     | Yes     | Yes | Yes | Yes | No      | Yes     | Yes     | Yes     | Yes     | Yes     | No      | No      | Low          |
| Jensen et al., 2013                                                                                                | Yes | Yes     | No      | Yes | Unclear | Unclear | No      | Yes     | Yes     | No  | Yes | Yes | No      | No      | Yes     | Yes     | Yes     | Yes     | No      | Yes     | Medium       |
| Mortz et al., 2014                                                                                                 | Yes | Yes     | No      | Yes | Yes     | Unclear | No      | Yes     | Yes     | No  | Yes | Yes | No      | No      | Yes     | Yes     | Yes     | Yes     | No      | Yes     | High         |
| Egeberg et al., 2017                                                                                               | Yes | Yes     | No      | Yes | No      | No      | No      | Yes     | Yes     | No  | Yes | Yes | N/A     | N/A     | Yes     | Yes     | Yes     | Yes     | No      | Yes     | Low          |
| Blegvad et al., 2017                                                                                               | Yes | Yes     | N/A     | Yes | Yes     | Yes     | N/A     | Yes     | Yes     | Yes | Yes | Yes | N/A     | N/A     | Yes     | Yes     | Yes     | Yes     | No      | Yes     | Low          |
| Egeberg et al., 2019                                                                                               | Yes | Yes     | No      | Yes | Yes     | Yes     | Yes     | Yes     | Yes     | Yes | Yes | Yes | No      | Yes     | Yes     | Yes     | Yes     | Yes     | No      | N/A     | Low          |
| Abdel-Hafez et al., 2003                                                                                           | Yes | Yes     | Yes     | Yes | Yes     | Yes     | Yes     | Yes     | Yes     | Yes | Yes | Yes | No      | No      | Yes     | Yes     | Yes     | No      | No      | Yes     | Low          |
| Yamamah et al., 2012                                                                                               | No  | Yes     | No      | Yes | Yes     | Yes     | No      | Yes     | Yes     | Yes | No  | Yes | No      | No      | Yes     | Yes     | Yes     | No      | No      | No      | High         |
| El-Khateeb et al., 2014                                                                                            | Yes | Yes     | Yes     | Yes | Yes     | Yes     | No      | Yes     | Yes     | Yes | Yes | Yes | No      | No      | Yes     | Yes     | Yes     | Yes     | No      | No      | Low          |
| Nada et al., 2014                                                                                                  | Yes | Yes     | No      | Yes | Yes     | Yes     | Unclear | Yes     | Yes     | No  | No  | Yes | Unclear | No      | No      | Yes     | Yes     | No      | No      | Unclear | High         |
| Wolkenstein et al., 2003                                                                                           | Yes | Yes     | No      | Yes | Yes     | Yes     | No      | Yes     | No      | No  | Yes | Yes | Yes     | Yes     | Yes     | Yes     | Yes     | Yes     | No      | Unclear | Low          |
| Wolkenstein et al., 2009                                                                                           | Yes | Yes     | No      | Yes | Yes     | Yes     | No      | Yes     | Yes     | Yes | Yes | Yes | Yes     | No      | Yes     | Yes     | Yes     | Yes     | No      | Unclear | Low          |
| Richard et al., 2018                                                                                               | Yes | Yes     | No      | Yes | Yes     | Yes     | Yes     | Yes     | Yes     | Yes | Yes | Yes | No      | No      | Yes     | Yes     | Yes     | Yes     | No      | N/A     | Low          |
| Schlander et al., 2008                                                                                             | Yes | Yes     | N/A     | Yes | Yes     | Yes     | N/A     | Yes     | Yes     | No  | No  | No  | N/A     | N/A     | Unclear | Yes     | Yes     | No      | No      | N/A     | High         |
| Schafer et al., 2009                                                                                               | Yes | Yes     | N/A     | Yes | Yes     | Yes     | N/A     | Yes     | Yes     | No  | No  | No  | N/A     | N/A     | Unclear | Yes     | Yes     | No      | No      | N/A     | High         |
| Augustin et al., 2010                                                                                              | Yes | Yes     | Yes     | Yes | Yes     | Yes     | N/A     | Yes     | Yes     | Yes | Yes | No  | N/A     | N/A     | Yes     | Yes     | Yes     | Yes     | Unclear | No      | Low          |
| Augustin et al., 2010                                                                                              | Yes | Yes     | N/A     | Yes | Yes     | Yes     | N/A     | Yes     | Yes     | Yes | No  | Yes | N/A     | N/A     | Yes     | Yes     | Yes     | Yes     | No      | N/A     | Low          |
| Schmitt et al., 2010                                                                                               | Yes | Yes     | No      | Yes | Yes     | Yes     | Unclear | Yes     | Yes     | No  | No  | Yes | No      | No      | Yes     | Yes     | Yes     | No      | No      | Unclear | High         |
| Schmitt et al., 2010                                                                                               | Yes | Yes     | Yes     | Yes | Yes     | Yes     | N/A     | Yes     | Yes     | Yes | Yes | Yes | N/A     | N/A     | Yes     | Yes     | Yes     | Yes     | No      | N/A     | Medium       |
| Augustin et al., 2011                                                                                              | Yes | Yes     | No      | Yes | Yes     | Yes     | No      | Yes     | Yes     | Yes | Yes | No  | No      | No      | Unclear | Yes     | Yes     | Yes     | No      | Unclear | Low          |
| Augustin et al., 2011                                                                                              | Yes | Yes     | Yes     | Yes | Yes     | Yes     | N/A     | Yes     | Yes     | Yes | Yes | Yes | N/A     | N/A     | Yes     | Yes     | Yes     | Yes     | No      | N/A     | Low          |
| Schafer et al., 2011                                                                                               | Yes | Yes     | N/A     | Yes | Yes     | Yes     | N/A     | Yes     | Yes     | No  | Yes | Yes | N/A     | N/A     | Yes     | Yes     | Unclear | Unclear | No      | N/A     | Low          |
| Kampfe et al., 2012                                                                                                | Yes | Yes     | N/A     | Yes | Yes     | Yes     | N/A     | Yes     | Yes     | No  | No  | Yes | N/A     | N/A     | Yes     | Yes     | Yes     | No      | No      | N/A     | High         |

|                           |     |     |         |     |         |         |         |         |         |     |     |         |         |         |         |     |     |         |         |         |        |
|---------------------------|-----|-----|---------|-----|---------|---------|---------|---------|---------|-----|-----|---------|---------|---------|---------|-----|-----|---------|---------|---------|--------|
| Augustin et al., 2013     | Yes | Yes | Yes     | Yes | Yes     | Yes     | N/A     | Yes     | Yes     | No  | No  | Yes     | N/A     | N/A     | Yes     | Yes | Yes | Yes     | No      | N/A     | Low    |
| Matusiewicz et al., 2014  | Yes | Yes | Yes     | Yes | Yes     | Yes     | N/A     | Yes     | Yes     | Yes | Yes | Yes     | N/A     | N/A     | Yes     | Yes | Yes | Yes     | No      | N/A     | Low    |
| Radtke et al., 2014       | Yes | Yes | N/A     | Yes | Yes     | Yes     | N/A     | Yes     | Yes     | No  | No  | No      | N/A     | N/A     | Yes     | Yes | Yes | No      | No      | Unclear | High   |
| Augustin et al., 2015     | Yes | Yes | Yes     | Yes | Yes     | Yes     | N/A     | Yes     | Yes     | Yes | Yes | Yes     | N/A     | N/A     | Yes     | Yes | Yes | Yes     | No      | N/A     | Low    |
| Jacobi et al., 2015       | Yes | Yes | Yes     | Yes | Yes     | Yes     | N/A     | Yes     | Yes     | Yes | Yes | Yes     | N/A     | N/A     | Yes     | Yes | Yes | Yes     | No      | N/A     | Low    |
| Radtke et al., 2015       | Yes | Yes | N/A     | Yes | Yes     | Yes     | N/A     | Yes     | Yes     | No  | No  | No      | N/A     | N/A     | Yes     | Yes | Yes | No      | No      | Unclear | High   |
| Matterne et al., 2016     | Yes | Yes | Yes     | Yes | Yes     | Yes     | N/A     | Yes     | Yes     | Yes | Yes | Yes     | N/A     | N/A     | Yes     | Yes | Yes | Yes     | No      | Yes     | Low    |
| Jacob et al., 2016        | Yes | Yes | N/A     | Yes | Yes     | Yes     | N/A     | Yes     | Yes     | No  | No  | No      | N/A     | N/A     | No      | Yes | Yes | No      | No      | Unclear | High   |
| Radtke et al., 2017       | Yes | Yes | Yes     | Yes | Yes     | Yes     | N/A     | Yes     | Yes     | Yes | Yes | Yes     | N/A     | N/A     | Yes     | Yes | Yes | Yes     | No      | N/A     | Low    |
| Drewitz et al., 2018      | Yes | Yes | No      | Yes | Unclear | Unclear | Unclear | Unclear | Unclear | Yes | No  | No      | Unclear | No      | Unclear | Yes | Yes | No      | Unclear | Unclear | High   |
| Biermann et al., 2019     | Yes | Yes | N/A     | Yes | Yes     | Yes     | N/A     | Yes     | Yes     | No  | No  | No      | N/A     | N/A     | Unclear | Yes | Yes | No      | Unclear | Unclear | High   |
| Petersen et al., 2019     | Yes | Yes | N/A     | Yes | Yes     | No      | N/A     | Yes     | No      | No  | No  | No      | N/A     | N/A     | Unclear | Yes | No  | No      | No      | No      | High   |
| Sewerin et al., 2019      | Yes | Yes | N/A     | Yes | Yes     | Yes     | N/A     | Yes     | Yes     | No  | No  | No      | N/A     | N/A     | Yes     | Yes | Yes | Yes     | No      | Unclear | Medium |
| Grills et al., 2012       | Yes | Yes | Yes     | Yes | Yes     | Yes     | Yes     | Yes     | Yes     | Yes | Yes | Yes     | No      | No      | Yes     | Yes | Yes | Yes     | No      | Yes     | Low    |
| Dogra et al., 2003        | Yes | Yes | No      | Yes | Yes     | Yes     | Unclear | Yes     | N/A     | No  | No  | Yes     | Unclear | No      | Yes     | Yes | Yes | No      | No      | Unclear | Medium |
| Al-Rubiay et al., 2005    | Yes | Yes | No      | Yes | Yes     | Yes     | No      | Unclear | No      | No  | No  | Yes     | No      | No      | Yes     | Yes | Yes | Yes     | No      | Unclear | Medium |
| Ali et al., 2011          | Yes | Yes | No      | Yes | Yes     | Yes     | No      | Unclear | No      | Yes | Yes | Yes     | No      | No      | Yes     | Yes | Yes | No      | No      | Unclear | Medium |
| Shapiro et al., 2007      | Yes | Yes | Yes     | Yes | Yes     | Yes     | Yes     | Yes     | Yes     | Yes | Yes | Yes     | No      | No      | Yes     | Yes | Yes | Yes     | No      | No      | Low    |
| Shalom et al., 2018       | Yes | Yes | N/A     | Yes | Yes     | Yes     | N/A     | Yes     | Yes     | Yes | No  | Yes     | N/A     | N/A     | Yes     | Yes | Yes | Yes     | No      | Unclear | Low    |
| Schonmann et al., 2019    | Yes | Yes | N/A     | Yes | Yes     | Yes     | N/A     | Yes     | Yes     | Yes | Yes | Yes     | N/A     | N/A     | Yes     | Yes | Yes | Yes     | No      | Yes     | Low    |
| Naldi et al., 2004        | Yes | Yes | Yes     | Yes | Yes     | Yes     | No      | Yes     | Yes     | Yes | Yes | Yes     | No      | No      | Yes     | Yes | Yes | Yes     | No      | No      | Low    |
| Saraceno et al., 2008     | Yes | Yes | No      | Yes | Yes     | Yes     | Yes     | Yes     | No      | No  | Yes | No      | Yes     | No      | Yes     | Yes | Yes | Yes     | Unclear | Unclear | Medium |
| Naldi et al., 2009        | Yes | Yes | No      | Yes | Yes     | Yes     | No      | Yes     | Yes     | Yes | Yes | Yes     | No      | No      | Yes     | Yes | Yes | Yes     | No      | Yes     | Low    |
| Vena et al., 2010         | Yes | Yes | Yes     | Yes | Yes     | Yes     | N/A     | Yes     | Yes     | Yes | Yes | Yes     | No      | No      | Yes     | Yes | Yes | Yes     | No      | No      | Low    |
| Sardu et al., 2012        | Yes | Yes | No      | Yes | Yes     | Yes     | No      | Yes     | Yes     | Yes | Yes | Yes     | No      | No      | Yes     | Yes | Yes | Yes     | No      | Unclear | Low    |
| Cantarutti et al., 2015   | Yes | Yes | Yes     | Yes | Yes     | Yes     | No      | Yes     | Yes     | Yes | Yes | Yes     | Unclear | No      | Yes     | Yes | Yes | Yes     | No      | Yes     | Low    |
| Pezzolo et al., 2019      | Yes | Yes | No      | Yes | Yes     | Yes     | Unclear | Yes     | Yes     | Yes | Yes | Yes     | Unclear | Unclear | Yes     | Yes | Yes | Yes     | No      | Yes     | Low    |
| Kubota et al., 2015       | Yes | Yes | Yes     | Yes | Yes     | Yes     | N/A     | Yes     | Yes     | Yes | Yes | Yes     | No      | No      | Yes     | Yes | Yes | Yes     | No      | Yes     | Low    |
| Abolfotouh et al., 1996   | Yes | Yes | Yes     | Yes | Yes     | Yes     | No      | Yes     | Yes     | Yes | Yes | Yes     | No      | No      | Yes     | Yes | Yes | No      | No      | Unclear | Medium |
| Al-Saeed et al., 2006     | Yes | Yes | Yes     | Yes | Yes     | Yes     | Yes     | Yes     | Yes     | No  | Yes | Yes     | No      | N/A     | Yes     | Yes | Yes | No      | No      | Yes     | Medium |
| Amin et al., 2011         | Yes | Yes | Yes     | Yes | Yes     | Yes     | No      | Yes     | Yes     | Yes | Yes | Yes     | No      | Yes     | Yes     | Yes | Yes | Yes     | No      | Yes     | Medium |
| Rahamathulla et al., 2019 | Yes | Yes | No      | Yes | Yes     | Yes     | No      | Yes     | Yes     | No  | Yes | Yes     | No      | No      | No      | Yes | Yes | No      | No      | Yes     | Low    |
| Walker et al., 2008       | Yes | Yes | No      | Yes | No      | No      | No      | Yes     | Yes     | No  | N/A | Yes     | Yes     | No      | Yes     | Yes | Yes | Yes     | No      | Yes     | High   |
| Kavli et al., 1985        | No  | Yes | No      | Yes | Yes     | No      | No      | Yes     | No      | Yes | No  | No      | No      | No      | Unclear | Yes | Yes | No      | No      | Unclear | High   |
| Braathen et al., 1989     | Yes | Yes | No      | Yes | Yes     | Yes     | No      | Yes     | Yes     | Yes | Yes | Yes     | No      | Yes     | Yes     | Yes | Yes | Yes     | No      | Unclear | Low    |
| Falk et al., 1993         | Yes | Yes | Yes     | Yes | Yes     | Yes     | N/A     | Yes     | Yes     | Yes | Yes | Yes     | N/A     | N/A     | No      | Yes | Yes | Yes     | No      | Unclear | Medium |
| Bo et al., 2008           | Yes | Yes | Yes     | Yes | Yes     | Unclear | No      | Yes     | Yes     | Yes | No  | Yes     | Yes     | No      | No      | No  | Yes | Yes     | No      | Yes     | Medium |
| Danielsen et al., 2013    | Yes | Yes | No      | Yes | Yes     | Yes     | No      | No      | Yes     | Yes | No  | Yes     | No      | No      | Yes     | No  | Yes | No      | No      | Yes     | Medium |
| Hoff et al., 2015         | Yes | Yes | No      | Yes | Yes     | Yes     | No      | Yes     | Yes     | Yes | Yes | Yes     | No      | No      | Yes     | Yes | Yes | Yes     | No      | Yes     | Medium |
| Modalsli et al., 2016     | Yes | Yes | No      | Yes | Yes     | Yes     | Yes     | Yes     | Yes     | Yes | Yes | Yes     | No      | Yes     | Yes     | Yes | Yes | Yes     | No      | Yes     | Low    |
| Hegvik et al., 2017       | Yes | No  | No      | Yes | Yes     | Unclear | No      | Yes     | Yes     | Yes | Yes | Yes     | N/A     | N/A     | Yes     | Yes | Yes | Yes     | No      | Yes     | High   |
| Borzecki et al., 2012     | No  | Yes | Unclear | Yes | Yes     | Yes     | No      | No      | No      | No  | No  | Unclear | Unclear | No      | Yes     | Yes | Yes | No      | No      | No      | High   |
| Borzecki et al., 2018     | Yes | Yes | N/A     | Yes | Yes     | Yes     | N/A     | Yes     | Yes     | No  | No  | Yes     | N/A     | N/A     | Yes     | Yes | Yes | Yes     | No      | Unclear | Medium |
| Videira et al., 2017      | Yes | Yes | N/A     | Yes | Yes     | Yes     | N/A     | Yes     | Yes     | Yes | Yes | Yes     | N/A     | N/A     | Yes     | Yes | Yes | Yes     | No      | Yes     | Medium |
| Lee et al., 2017          | Yes | Yes | No      | Yes | Yes     | Yes     | N/A     | Yes     | Yes     | No  | Yes | No      | N/A     | N/A     | Unclear | Yes | Yes | Yes     | No      | No      | Low    |
| Oh et al., 2017           | Yes | Yes | No      | Yes | Yes     | Unclear | N/A     | Yes     | Yes     | Yes | No  | No      | N/A     | N/A     | Unclear | Yes | Yes | Yes     | No      | Unclear | Medium |
| Han et al., 2018          | Yes | Yes | N/A     | Yes | Yes     | Yes     | N/A     | Yes     | Yes     | Yes | Yes | Yes     | N/A     | N/A     | Yes     | Yes | Yes | Yes     | No      | Yes     | Low    |
| Popescu et al., 1999      | Yes | Yes | No      | Yes | Yes     | Yes     | Yes     | Yes     | Yes     | No  | Yes | Yes     | No      | Yes     | Yes     | Yes | Yes | No      | No      | Yes     | Low    |
| Boca et al., 2019         | Yes | Yes | Yes     | Yes | Yes     | Yes     | N/A     | Yes     | Yes     | Yes | Yes | Yes     | No      | No      | Yes     | Yes | Yes | Yes     | No      | Yes     | Low    |
| Osmanova et al., 1985     | Yes | Yes | No      | Yes | Yes     | Unclear | Unclear | Yes     | Yes     | No  | No  | Yes     | Unclear | No      | Yes     | Yes | No  | No      | No      | Unclear | High   |
| Znamenskaya et al., 2012  | Yes | Yes | N/A     | Yes | Yes     | Yes     | N/A     | Yes     | Yes     | No  | No  | Yes     | N/A     | N/A     | Unclear | Yes | Yes | Unclear | No      | Unclear | Low    |

|                                   |     |     |     |     |         |         |         |     |         |     |         |     |         |     |         |     |     |         |    |         |        |
|-----------------------------------|-----|-----|-----|-----|---------|---------|---------|-----|---------|-----|---------|-----|---------|-----|---------|-----|-----|---------|----|---------|--------|
| Kubanova et al., 2017             | Yes | Yes | N/A | Yes | Yes     | Yes     | N/A     | Yes | Yes     | No  | No      | Yes | N/A     | N/A | Unclear | Yes | Yes | Unclear | No | Unclear | Low    |
| Odinets et al., 2017              | Yes | Yes | N/A | Yes | Yes     | Yes     | N/A     | Yes | Yes     | No  | No      | Yes | N/A     | N/A | Unclear | Yes | Yes | Unclear | No | Unclear | Low    |
| Campion et al., 1983              | Yes | Yes | No  | Yes | Yes     | Yes     | No      | Yes | No      | No  | No      | No  | Yes     | No  | Unclear | Yes | Yes | Yes     | No | Unclear | High   |
| Simpson et al., 2002              | Yes | Yes | No  | Yes | Yes     | Yes     | No      | Yes | Yes     | Yes | Yes     | No  | No      | No  | Yes     | Yes | Yes | Yes     | No | Unclear | Medium |
| McHattie et al., 2012             | Yes | Yes | N/A | Yes | Yes     | Yes     | N/A     | Yes | Yes     | No  | No      | No  | N/A     | N/A | Unclear | Yes | No  | No      | No | Unclear | High   |
| Ferrandiz et al., 2001            | Yes | Yes | Yes | Yes | Yes     | Yes     | No      | Yes | No      | Yes | Yes     | Yes | No      | No  | Yes     | Yes | Yes | Yes     | No | No      | Low    |
| Fernandez-Sueiro et al., 2012     | Yes | Yes | No  | Yes | Yes     | Yes     | No      | Yes | Yes     | No  | No      | Yes | Yes     | No  | Yes     | Yes | Yes | No      | No | Unclear | High   |
| Ferrandiz et al., 2014            | Yes | Yes | Yes | Yes | Yes     | Yes     | No      | Yes | Yes     | No  | Yes     | Yes | Unclear | No  | Yes     | Yes | Yes | Yes     | No | Unclear | Low    |
| Siso-Almirall et al., 2018        | Yes | Yes | No  | Yes | Yes     | Yes     | N/A     | Yes | Yes     | No  | No      | No  | N/A     | N/A | Yes     | Yes | Yes | No      | No | Unclear | High   |
| Fernandez-Armenteros et al., 2019 | Yes | Yes | N/A | Yes | Yes     | Yes     | N/A     | Yes | Yes     | Yes | Yes     | Yes | N/A     | N/A | No      | Yes | Yes | Yes     | No | Yes     | Low    |
| Perera et al., 2000               | No  | Yes | Yes | Yes | Yes     | Yes     | No      | Yes | Yes     | No  | Yes     | Yes | No      | No  | Yes     | Yes | Yes | No      | No | Unclear | Low    |
| Hellgren et al., 1967             | Yes | Yes | No  | Yes | Yes     | Unclear | Yes     | Yes | Yes     | No  | Unclear | Yes | No      | Yes | Yes     | Yes | Yes | Yes     | No | No      | Low    |
| Larsson et al., 1980              | Yes | Yes | No  | Yes | Unclear | Yes     | Yes     | Yes | Yes     | No  | Yes     | Yes | No      | Yes | Yes     | Yes | Yes | Yes     | No | Yes     | Low    |
| Lindberg et al., 2014             | Yes | Yes | No  | Yes | Yes     | Yes     | Yes     | Yes | Yes     | Yes | Yes     | Yes | No      | Yes | Yes     | Yes | Yes | Yes     | No | Yes     | Low    |
| Lofvendahl et al., 2014           | Yes | Yes | Yes | Yes | Yes     | Yes     | N/A     | Yes | Yes     | Yes | Yes     | Yes | N/A     | N/A | Yes     | Yes | Yes | Yes     | No | Yes     | Low    |
| Yang et al., 2007                 | Yes | Yes | No  | Yes | Yes     | Yes     | No      | Yes | Yes     | Yes | Yes     | Yes | Yes     | Yes | Yes     | Yes | Yes | Yes     | No | No      | Medium |
| Chen et al., 2008                 | Yes | Yes | No  | Yes | Yes     | Yes     | No      | Yes | Yes     | Yes | Yes     | Yes | No      | No  | Yes     | Yes | Yes | Yes     | No | No      | Medium |
| Chang et al., 2009                | Yes | Yes | No  | Yes | Yes     | Yes     | N/A     | Yes | No      | Yes | Yes     | No  | N/A     | N/A | Yes     | Yes | Yes | Yes     | No | Yes     | Medium |
| Tsai et al., 2011                 | Yes | Yes | No  | Yes | Yes     | Yes     | N/A     | Yes | Yes     | Yes | Yes     | Yes | N/A     | N/A | Yes     | Yes | Yes | Yes     | No | No      | Low    |
| Chiang et al., 2012               | Yes | Yes | No  | Yes | Yes     | Yes     | N/A     | Yes | Yes     | Yes | Yes     | Yes | N/A     | N/A | Yes     | Yes | Yes | Yes     | No | No      | Medium |
| Wang et al., 2016                 | Yes | Yes | Yes | Yes | Yes     | Yes     | N/A     | Yes | Yes     | Yes | Yes     | Yes | N/A     | N/A | Yes     | Yes | Yes | Yes     | No | Yes     | Low    |
| Wei et al., 2018                  | Yes | Yes | Yes | Yes | Yes     | Yes     | N/A     | Yes | Yes     | Yes | Yes     | Yes | N/A     | N/A | Yes     | Yes | Yes | Yes     | No | Yes     | Low    |
| Gibbs et al., 1996                | Yes | Yes | No  | Yes | Yes     | Yes     | Yes     | Yes | No      | No  | Yes     | No  | Yes     | No  | Yes     | Yes | Yes | No      | No | Unclear | Low    |
| El Fekih et al., 2007             | Yes | Yes | No  | Yes | Unclear | Unclear | Unclear | Yes | Yes     | No  | No      | No  | Unclear | No  | Unclear | Yes | Yes | No      | No | Unclear | High   |
| Donker et al., 1998               | Yes | Yes | No  | Yes | Yes     | Yes     | N/A     | No  | No      | No  | No      | No  | N/A     | N/A | No      | No  | Yes | Unclear | No | Unclear | High   |
| Westert GP et al., 2005           | Yes | Yes | No  | Yes | Yes     | Yes     | Yes     | Yes | Yes     | Yes | Yes     | Yes | No      | Yes | Yes     | Yes | Yes | Yes     | No | Yes     | Medium |
| Karreman et al., 2016             | Yes | Yes | No  | Yes | Yes     | Yes     | Yes     | Yes | Yes     | Yes | Yes     | Yes | No      | No  | Yes     | Yes | Yes | Yes     | No | Yes     | Low    |
| Dowlatshahi et al., 2017          | Yes | Yes | N/A | Yes | Yes     | Yes     | N/A     | Yes | Yes     | Yes | Yes     | Yes | N/A     | N/A | Yes     | Yes | Yes | Yes     | No | Unclear | Medium |
| Sanders et al., 2017              | Yes | Yes | No  | Yes | Yes     | Yes     | Yes     | Yes | Yes     | Yes | Yes     | No  | No      | No  | Yes     | Yes | Yes | No      | No | Yes     | Medium |
| Cakir et al., 2012                | Yes | Yes | Yes | Yes | Yes     | Yes     | No      | Yes | Yes     | Yes | Yes     | Yes | No      | No  | Yes     | Yes | Yes | Yes     | No | Yes     | Low    |
| Serdaroğlu et al., 2012           | Yes | Yes | Yes | Yes | Yes     | Yes     | No      | Yes | No      | No  | No      | Yes | No      | No  | Yes     | Yes | Yes | No      | No | Unclear | Low    |
| Bas et al., 2016                  | Yes | Yes | Yes | Yes | Yes     | No      | Yes     | Yes | Yes     | Yes | Yes     | Yes | No      | No  | Yes     | Yes | Yes | No      | No | No      | Low    |
| Yayli et al., 2016                | Yes | Yes | Yes | Yes | Yes     | Yes     | No      | Yes | No      | Yes | Yes     | Yes | No      | No  | Yes     | Yes | Yes | Yes     | No | Yes     | Low    |
| Williams et al., 1994             | Yes | Yes | Yes | Yes | Yes     | Yes     | Unclear | Yes | Yes     | No  | No      | No  | Unclear | No  | Unclear | Yes | Yes | Yes     | No | Unclear | Medium |
| Nevitt et al., 1996               | Yes | Yes | Yes | Yes | Yes     | Yes     | Yes     | Yes | Yes     | Yes | Yes     | Yes | No      | Yes | Yes     | Yes | Yes | Yes     | No | No      | Low    |
| O'Neill et al., 1996              | Yes | Yes | No  | Yes | Yes     | Yes     | Yes     | Yes | Yes     | No  | Yes     | Yes | No      | Yes | Yes     | Yes | Yes | No      | No | Yes     | Low    |
| Kay et al., 1999                  | Yes | Yes | No  | Yes | Yes     | Yes     | No      | Yes | Unclear | No  | No      | Yes | No      | No  | Yes     | Yes | No  | No      | No | No      | Medium |
| Gelfand et al., 2005              | Yes | Yes | No  | Yes | Yes     | Yes     | N/A     | Yes | Yes     | Yes | Yes     | Yes | N/A     | N/A | Yes     | Yes | Yes | Yes     | No | Yes     | Low    |
| Gillard et al., 2005              | Yes | Yes | No  | Yes | Yes     | Yes     | N/A     | Yes | Yes     | Yes | Yes     | Yes | N/A     | N/A | Yes     | Yes | Yes | Yes     | No | Unclear | High   |
| Huerta et al., 2007               | Yes | Yes | Yes | Yes | No      | No      | N/A     | Yes | Yes     | Yes | No      | Yes | N/A     | N/A | Yes     | Yes | Yes | Yes     | No | No      | High   |
| Seminara et al., 2011             | Yes | Yes | No  | Yes | Yes     | Yes     | N/A     | Yes | Yes     | Yes | Yes     | Yes | N/A     | N/A | Yes     | Yes | Yes | Yes     | No | Yes     | Low    |
| Khalid et al., 2013               | Yes | Yes | No  | Yes | Yes     | Yes     | N/A     | Yes | Yes     | Yes | Yes     | Yes | N/A     | N/A | Yes     | Yes | Yes | Yes     | No | No      | Low    |
| Ogdie et al., 2013                | Yes | Yes | No  | Yes | Yes     | Yes     | N/A     | Yes | Yes     | Yes | Yes     | Yes | N/A     | N/A | Yes     | Yes | Yes | Yes     | No | Yes     | Medium |
| Springate et al., 2017            | Yes | Yes | No  | Yes | Yes     | Yes     | N/A     | Yes | Yes     | Yes | Yes     | Yes | N/A     | N/A | Yes     | Yes | Yes | Yes     | No | Yes     | Low    |
| Tillett et al., 2017              | Yes | Yes | N/A | Yes | Yes     | Yes     | N/A     | Yes | Yes     | Yes | Yes     | Yes | N/A     | N/A | Yes     | Yes | Yes | No      | No | Yes     | Medium |
| Johnson et al., 1978              | Yes | Yes | Yes | Yes | Yes     | Yes     | No      | Yes | Yes     | No  | No      | Yes | No      | No  | Yes     | No  | Yes | Yes     | No | Yes     | Low    |
| Bell et al., 1991                 | Yes | Yes | No  | Yes | Yes     | Yes     | N/A     | Yes | Yes     | Yes | No      | Yes | N/A     | N/A | Unclear | Yes | Yes | Yes     | No | No      | Medium |
| Shbeeb et al., 1995               | Yes | Yes | No  | Yes | Yes     | Yes     | N/A     | Yes | Yes     | Yes | No      | Yes | N/A     | N/A | Yes     | Yes | Yes | No      | No | No      | Low    |
| Koo, 1996                         | Yes | Yes | Yes | Yes | Yes     | Yes     | No      | Yes | Yes     | No  | Unclear | No  | No      | No  | Yes     | Yes | Yes | Yes     | No | Unclear | Medium |

|                         |     |     |     |     |         |         |         |         |         |     |     |     |         |     |         |     |     |     |    |         |        |
|-------------------------|-----|-----|-----|-----|---------|---------|---------|---------|---------|-----|-----|-----|---------|-----|---------|-----|-----|-----|----|---------|--------|
| Javitz et al., 2002     | Yes | Yes | No  | Yes | Yes     | Yes     | No      | Yes     | Yes     | No  | No  | Yes | No      | No  | Yes     | No  | Yes | Yes | No | No      | Medium |
| Gelfand et al., 2004    | Yes | Yes | No  | Yes | Yes     | Yes     | No      | Yes     | Yes     | Yes | Yes | Yes | No      | No  | Yes     | Yes | Yes | Yes | No | Unclear | Low    |
| Stern et al., 2004      | Yes | Yes | No  | Yes | Yes     | Yes     | No      | Yes     | Yes     | Yes | Yes | Yes | No      | No  | Yes     | Yes | Yes | Yes | No | Unclear | Low    |
| Gelfand et al., 2005    | Yes | Yes | No  | Yes | Yes     | Yes     | No      | Yes     | Yes     | Yes | Yes | Yes | No      | No  | Yes     | Yes | Yes | Yes | No | Unclear | Low    |
| Icen et al., 2009       | Yes | Yes | No  | Yes | Yes     | Yes     | N/A     | Yes     | Yes     | Yes | Yes | Yes | N/A     | N/A | Yes     | Yes | Yes | Yes | No | No      | Low    |
| Kurd et al., 2009       | Yes | Yes | No  | Yes | Yes     | Yes     | No      | Yes     | Yes     | Yes | No  | Yes | No      | No  | No      | No  | Yes | Yes | No | Yes     | Low    |
| Wu et al., 2009         | Yes | Yes | No  | No  | Yes     | Yes     | Unclear | Yes     | Yes     | Yes | Yes | Yes | Unclear | No  | No      | Yes | Yes | Yes | No | Yes     | Medium |
| Tollefson et al., 2010  | Yes | Yes | No  | Yes | Yes     | Yes     | N/A     | Yes     | Yes     | Yes | No  | Yes | N/A     | N/A | Yes     | Yes | Yes | Yes | No | No      | Low    |
| Helmick et al., 2014    | Yes | Yes | No  | Yes | Yes     | Yes     | No      | Yes     | Yes     | Yes | Yes | Yes | No      | No  | Yes     | Yes | Yes | Yes | No | Yes     | Low    |
| Rachakonda et al., 2014 | Yes | Yes | No  | Yes | Yes     | Yes     | No      | Yes     | Yes     | Yes | Yes | Yes | No      | No  | Yes     | Yes | Yes | Yes | No | Yes     | Low    |
| Swary et al., 2015      | Yes | Yes | Yes | Yes | Yes     | Unclear | N/A     | Yes     | Yes     | Yes | Yes | Yes | N/A     | N/A | Yes     | Yes | Yes | Yes | No | Yes     | Medium |
| Mendelson et al., 2017  | Yes | Yes | No  | Yes | No      | Unclear | No      | Yes     | Yes     | No  | Yes | Yes | No      | No  | Yes     | Yes | Yes | Yes | No | Yes     | Medium |
| Cooksey et al., 2018    | Yes | Yes | N/A | Yes | Yes     | Yes     | N/A     | Yes     | Yes     | Yes | Yes | Yes | N/A     | N/A | No      | Yes | Yes | Yes | No | N/A     | Medium |
| Arzensek et al., 1984   | Yes | Yes | No  | Yes | Yes     | Yes     | No      | Yes     | Yes     | No  | No  | No  | No      | No  | Yes     | Yes | Yes | No  | No | Unclear | Medium |
| Benchikhi et al., 2012  | Yes | Yes | No  | No  | Unclear | Unclear | Unclear | Unclear | Unclear | No  | No  | No  | Unclear | No  | Unclear | Yes | Yes | No  | No | Unclear | High   |
| Lillie et al., 2012     | Yes | Yes | N/A | Yes | Yes     | Yes     | N/A     | Unclear | Unclear | No  | No  | No  | N/A     | N/A | Unclear | Yes | Yes | No  | No | Unclear | High   |
| Lebwohl et al., 2014    | Yes | Yes | No  | Yes | Yes     | Yes     | No      | Yes     | Yes     | Yes | No  | No  | Yes     | No  | Unclear | Yes | Yes | Yes | No | Yes     | Medium |
| Augustin et al., 2017   | Yes | Yes | No  | Yes | Yes     | Yes     | No      | Yes     | Yes     | Yes | Yes | No  | No      | No  | Unclear | Yes | Yes | Yes | No | Unclear | Medium |
| Svensson et al., 2018   | Yes | Yes | Yes | Yes | Yes     | Yes     | No      | Yes     | Yes     | Yes | Yes | Yes | No      | No  | Yes     | Yes | Yes | No  | No | Yes     | Low    |
| Danielsen et al., 2019  | Yes | Yes | No  | Yes | Yes     | Yes     | No      | Yes     | Yes     | Yes | Yes | Yes | No      | No  | Yes     | Yes | Yes | Yes | No | Yes     | Medium |

AXIS: Appraisal tool of Cross-Sectional Studies:

- Q1) Were the aims/objectives of the study clear?
- Q2) Was the study design appropriate for the stated aim(s)?
- Q3) Was the sample size justified?
- Q4) Was the target/reference population clearly defined? (Is it clear who the research was about?)
- Q5) Was the sample frame taken from an appropriate population base so that it closely represented the target/reference population under investigation?
- Q6) Was the selection process likely to select subjects/participants that were representative of the target/reference population under investigation?
- Q7) Were measures undertaken to address and categorise non-responders?
- Q8) Were the risk factor and outcome variables measured appropriate to the aims of the study?
- Q9) Were the risk factor and outcome variables measured correctly using instruments/measurements that had been trialled, piloted or published previously?
- Q10) Is it clear what was used to determined statistical significance and/or precision estimates? (eg, p values, CIs)
- Q11) Were the methods (including statistical methods) sufficiently described to enable them to be repeated?
- Q12) Were the basic data adequately described?
- Q13) Does the response rate raise concerns about non-response bias?
- Q14) If appropriate, was information about non-responders described?
- Q15) Were the results internally consistent?
- Q16) Were the results for the analyses described in the methods, presented?
- Q17) Were the authors' discussions and conclusions justified by the results?
- Q18) Were the limitations of the study discussed?
- Q19) Were there any funding sources or conflicts of interest that may affect the authors' interpretation of the results?
- Q20) Was ethical approval or consent of participants attained?
